# Supplementary material for: Biological implications of genetic variations in autism spectrum disorders from genomics studies
Source: PubMed Central journal article supplement (PMC8298259; doi:10.1042/bsr20210593), 2021-07-22
Supplement: BSR-2021-0593C_supp.pdf [file BSR-2021-0593C_supp.pdf]

**Table S1. ASD risk genes with single nucleotide variants.**

| <b>Gene symbol</b> | <b>Gene name</b>                                          | <b>Ensembl ID</b> | <b>Chromosome</b> | <b>Genetics category</b>                         |
|--------------------|-----------------------------------------------------------|-------------------|-------------------|--------------------------------------------------|
| <i>ABAT</i>        | 4-aminobutyrate aminotransferase                          | ENSG00000183044   | 16                | Rare Single Gene Mutation, Genetic Association   |
| <i>ABCA10</i>      | ATP-binding cassette, sub-family A (ABC1), member 10      | ENSG00000154263   | 17                | Rare Single Gene Mutation                        |
| <i>ABCA13</i>      | ATP binding cassette subfamily A member 13                | ENSG00000179869   | 7                 | Rare Single Gene Mutation, Functional            |
| <i>ABCA7</i>       | ATP-binding cassette, sub-family A (ABC1), member 7       | ENSG00000064687   | 19                | Rare Single Gene Mutation                        |
| <i>ACE</i>         | angiotensin I converting enzyme                           | ENSG00000159640   | 17                | Rare Single Gene Mutation, Genetic Association   |
| <i>ACHE</i>        | Acetylcholinesterase (Yt blood group)                     | ENSG00000087085   | 7                 | Rare Single Gene Mutation                        |
| <i>ACTB</i>        | actin beta                                                | ENSG00000075624   | 7                 | Rare Single Gene Mutation, Syndromic             |
| <i>ACTL6B</i>      | actin like 6B                                             | ENSG00000077080   | 7                 | Rare Single Gene Mutation, Syndromic             |
| <i>ACTN4</i>       | actinin alpha 4                                           | ENSG00000130402   | 19                | Rare Single Gene Mutation                        |
| <i>ACY1</i>        | aminoacylase 1                                            | ENSG00000243989   | 3                 | Rare Single Gene Mutation, Syndromic             |
| <i>ADA</i>         | adenosine deaminase                                       | ENSG00000196839   | 20                | Rare Single Gene Mutation, Genetic Association   |
| <i>ADCY3</i>       | adenylate cyclase 3                                       | ENSG00000138031   | 2                 | Rare Single Gene Mutation                        |
| <i>ADCY5</i>       | Adenylate cyclase 5                                       | ENSG00000173175   | 3                 | Rare Single Gene Mutation                        |
| <i>ADK</i>         | adenosine kinase                                          | ENSG00000156110   | 10                | Rare Single Gene Mutation                        |
| <i>ADNP</i>        | Activity-dependent neuroprotector homeobox                | ENSG00000101126   | 20                | Rare Single Gene Mutation, Syndromic, Functional |
| <i>ADORA3</i>      | Adenosine A3 receptor                                     | ENSG00000282608   | 1                 | Rare Single Gene Mutation, Functional            |
| <i>ADSL</i>        | adenylosuccinate lyase                                    | ENSG00000239900   | 22                | Rare Single Gene Mutation, Syndromic             |
| <i>AFF2</i>        | AF4/FMR2 family, member 2                                 | ENSG00000155966   | X                 | Rare Single Gene Mutation, Syndromic             |
| <i>AGAP1</i>       | ArfGAP with GTPase domain, ankyrin repeat and PH domain 1 | ENSG00000157985   | 2                 | Rare Single Gene Mutation                        |

|                |                                                                                    |                 |    |                                                           |
|----------------|------------------------------------------------------------------------------------|-----------------|----|-----------------------------------------------------------|
| <i>AGAP2</i>   | ArfGAP with GTPase domain, ankyrin repeat and PH domain 2                          | ENSG00000135439 | 12 | Rare Single Gene Mutation                                 |
| <i>ADSS2</i>   | adenylosuccinate synthase 2                                                        | ENSG00000035687 | 1  | Rare Single Gene Mutation                                 |
| <i>AGBL4</i>   | ATP/GTP binding protein-like 4                                                     | ENSG00000186094 | 1  | Rare Single Gene Mutation                                 |
| <i>AGMO</i>    | alkylglycerol monooxygenase                                                        | ENSG00000187546 | 7  | Rare Single Gene Mutation, Genetic Association            |
| <i>AGO1</i>    | argonaute 1, RISC catalytic component                                              | ENSG00000092847 | 1  | Rare Single Gene Mutation                                 |
| <i>AGO3</i>    | argonaute RISC catalytic component 3                                               | ENSG00000126070 | 1  | Rare Single Gene Mutation                                 |
| <i>AGO4</i>    | argonaute RISC catalytic component 4                                               | ENSG00000134698 | 1  | Rare Single Gene Mutation                                 |
| <i>AGTR2</i>   | angiotensin II receptor, type 2                                                    | ENSG00000180772 | X  | Rare Single Gene Mutation                                 |
| <i>AHDC1</i>   | AT-hook DNA binding motif containing 1                                             | ENSG00000126705 | 1  | Rare Single Gene Mutation, Syndromic                      |
| <i>AHII</i>    | Abelson helper integration site 1                                                  | ENSG00000135541 | 6  | Rare Single Gene Mutation, Syndromic, Genetic Association |
| <i>AKAP9</i>   | A kinase (PRKA) anchor protein 9                                                   | ENSG00000127914 | 7  | Rare Single Gene Mutation                                 |
| <i>ALDH1A3</i> | aldehyde dehydrogenase 1 family member A3                                          | ENSG00000184254 | 15 | Rare Single Gene Mutation, Syndromic                      |
| <i>ALDH5A1</i> | aldehyde dehydrogenase 5 family, member A1 (succinate-semialdehyde dehydrogenase ) | ENSG00000112294 | 6  | Rare Single Gene Mutation, Syndromic                      |
| <i>AMPD1</i>   | Adenosine monophosphate deaminase 1                                                | ENSG00000116748 | 1  | Rare Single Gene Mutation, Genetic Association            |
| <i>AMT</i>     | Aminomethyltransferase                                                             | ENSG00000145020 | 3  | Rare Single Gene Mutation                                 |

|                  |                                                                 |                 |    |                                                |
|------------------|-----------------------------------------------------------------|-----------------|----|------------------------------------------------|
| <i>ANK2</i>      | Ankyrin 2, neuronal                                             | ENSG00000145362 | 4  | Rare Single Gene Mutation                      |
| <i>ANK3</i>      | ankyrin 3                                                       | ENSG00000151150 | 10 | Rare Single Gene Mutation, Genetic Association |
| <i>AGAP5</i>     | ArfGAP with GTPase domain, ankyrin repeat and PH domain 5       | ENSG00000172650 | 10 | Rare Single Gene Mutation                      |
| <i>ANKRD11</i>   | ankyrin repeat domain 11                                        | ENSG00000167522 | 16 | Rare Single Gene Mutation, Syndromic           |
| <i>ANKS1B</i>    | ankyrin repeat and sterile alpha motif domain containing 1B     | ENSG00000185046 | 12 | Rare Single Gene Mutation, Syndromic           |
| <i>ANXA1</i>     | Annexin A1 adaptor related protein                              | ENSG00000135046 | 9  | Rare Single Gene Mutation                      |
| <i>AP1S2</i>     | complex 1 sigma 2 subunit                                       | ENSG00000182287 | X  | Rare Single Gene Mutation, Syndromic           |
| <i>APBA2</i>     | amyloid beta (A4) precursor protein-binding, family A, member 2 | ENSG00000034053 | 15 | Rare Single Gene Mutation                      |
| <i>APBB1</i>     | amyloid beta precursor protein binding family B member 1        | ENSG00000166313 | 11 | Rare Single Gene Mutation, Functional          |
| <i>APH1A</i>     | APH1A gamma secretase subunit                                   | ENSG00000117362 | 1  | Rare Single Gene Mutation                      |
| <i>ARHGAP11B</i> | Rho GTPase activating protein 11B                               | ENSG00000285077 | 15 | Rare Single Gene Mutation                      |
| <i>ARHGAP32</i>  | Rho GTPase activating protein 32                                | ENSG00000134909 | 11 | Rare Single Gene Mutation, Functional          |
| <i>ARHGAP5</i>   | Rho GTPase activating protein 5                                 | ENSG00000100852 | 14 | Rare Single Gene Mutation                      |
| <i>ARHGEF10</i>  | Rho guanine nucleotide exchange factor 10                       | ENSG00000104728 | 8  | Rare Single Gene Mutation, Functional          |
| <i>ARHGEF9</i>   | Cdc42 guanine nucleotide exchange factor (GEF) 9                | ENSG00000131089 | X  | Rare Single Gene Mutation, Syndromic           |
| <i>ARID1B</i>    | AT-rich interaction domain 1B                                   | ENSG00000049618 | 6  | Rare Single Gene Mutation, Syndromic           |

|               |                                                                     |                 |         |                                                            |
|---------------|---------------------------------------------------------------------|-----------------|---------|------------------------------------------------------------|
| <i>ARID2</i>  | AT-rich interaction domain 2                                        | ENSG00000189079 | 12      | Rare Single Gene Mutation, Syndromic                       |
| <i>ARNT2</i>  | aryl-hydrocarbon receptor nuclear translocator 2                    | ENSG00000172379 | 15      | Rare Single Gene Mutation, Syndromic, Genetic Association  |
| <i>ARX</i>    | aristaless related homeobox                                         | ENSG00000004848 | X       | Rare Single Gene Mutation, Syndromic                       |
| <i>ASAP2</i>  | ArfGAP with SH3 domain, ankyrin repeat and PH domain 2              | ENSG00000151693 | 2       | Rare Single Gene Mutation                                  |
| <i>ASB14</i>  | ankyrin repeat and SOCS box containing 14                           | ENSG00000239388 | 3       | Rare Single Gene Mutation                                  |
| <i>ASH1L</i>  | Ash1 (absent, small, or homeotic)-like (Drosophila)                 | ENSG00000116539 | 1       | Rare Single Gene Mutation, Syndromic                       |
| <i>ASMT</i>   | acetylserotonin O-methyltransferase                                 | ENSG00000196433 | X,Y     | Rare Single Gene Mutation, Genetic Association             |
| <i>ASPM</i>   | abnormal spindle microtubule assembly                               | ENSG00000066279 | 1       | Rare Single Gene Mutation, Syndromic, Functional           |
| <i>ASTN2</i>  | astrotactin 2                                                       | ENSG00000148219 | 9       | Rare Single Gene Mutation, Genetic Association             |
| <i>AP2S1</i>  | adaptor related protein complex 2 subunit sigma 1                   | ENSG00000042753 | 19      | Rare Single Gene Mutation                                  |
| <i>ASXL3</i>  | Additional sex combs like 3 (Drosophila)                            | ENSG00000141431 | 18      | Rare Single Gene Mutation, Syndromic                       |
| <i>ATP10A</i> | Probable phospholipid-transporting ATPase VA                        | ENSG00000206190 | 15      | Rare Single Gene Mutation, Genetic Association, Functional |
| <i>ATP1A1</i> | ATPase Na <sup>+</sup> /K <sup>+</sup> transporting subunit alpha 1 | ENSG00000163399 | 1       | Rare Single Gene Mutation, Syndromic                       |
| <i>ATP1A3</i> | ATPase Na <sup>+</sup> /K <sup>+</sup> transporting subunit alpha 3 | ENSG00000105409 | 19<br>3 | Rare Single Gene Mutation, Syndromic, Functional           |

|                 |                                                          |                 |    |                                                                       |
|-----------------|----------------------------------------------------------|-----------------|----|-----------------------------------------------------------------------|
| <i>ATP2B2</i>   | ATPase, Ca <sup>++</sup> transporting, plasma membrane 2 | ENSG00000157087 | 3  | Rare Single Gene Mutation, Genetic Association                        |
| <i>ATP6V0A2</i> | ATPase H <sup>+</sup> transporting V0 subunit a2         | ENSG00000185344 | 12 | Rare Single Gene Mutation                                             |
| <i>ATRX</i>     | alpha thalassemia/mental retardation syndrome X-linked   | ENSG00000085224 | X  | Rare Single Gene Mutation, Syndromic                                  |
| <i>AUTS2</i>    | autism susceptibility candidate 2                        | ENSG00000158321 | 7  | Rare Single Gene Mutation, Syndromic, Genetic Association, Functional |
| <i>AVPR1A</i>   | arginine vasopressin receptor 1A                         | ENSG00000166148 | 12 | Rare Single Gene Mutation, Genetic Association                        |
| <i>AZGP1</i>    | alpha-2-glycoprotein 1, zinc-binding                     | ENSG00000160862 | 7  | Rare Single Gene Mutation                                             |
| <i>BAZ2B</i>    | bromodomain adjacent to zinc finger domain 2B            | ENSG00000123636 | 2  | Rare Single Gene Mutation                                             |
| <i>BBS4</i>     | Bardet-Biedl syndrome 4                                  | ENSG00000140463 | 15 | Rare Single Gene Mutation, Syndromic                                  |
| <i>BCAS1</i>    | breast carcinoma amplified sequence 1                    | ENSG00000064787 | 20 | Rare Single Gene Mutation                                             |
| <i>BCKDK</i>    | Branched chain ketoacid dehydrogenase kinase             | ENSG00000103507 | 16 | Rare Single Gene Mutation                                             |
| <i>BCL11A</i>   | B-cell CLL/lymphoma 11A (zinc finger protein)            | ENSG00000119866 | 2  | Rare Single Gene Mutation, Syndromic                                  |
| <i>BCORL1</i>   | BCL6 corepressor like 1                                  | ENSG00000085185 | X  | Rare Single Gene Mutation, Syndromic                                  |
| <i>BIRC6</i>    | Baculoviral IAP repeat containing 6                      | ENSG00000115760 | 2  | Rare Single Gene Mutation                                             |
| <i>BRAF</i>     | v-raf murine sarcoma viral oncogene homolog              | ENSG00000157764 | 7  | Rare Single Gene Mutation, Syndromic                                  |
| <i>BRCA2</i>    | breast cancer 2, early onset                             | ENSG00000139618 | 13 | Rare Single Gene Mutation                                             |
| <i>BRD4</i>     | bromodomain containing 4                                 | ENSG00000141867 | 19 | Rare Single Gene Mutation, Syndromic                                  |

|                 |                                                                                                  |                 |    |                                                                       |
|-----------------|--------------------------------------------------------------------------------------------------|-----------------|----|-----------------------------------------------------------------------|
| <i>BRSK2</i>    | BR serine/threonine kinase 2                                                                     | ENSG00000174672 | 11 | Rare Single Gene Mutation, Syndromic                                  |
| <i>BTAF1</i>    | RNA polymerase II, B-TFIID transcription factor-associated, 170kDa (Mot1 homolog, S. cerevisiae) | ENSG00000095564 | 10 | Rare Single Gene Mutation                                             |
| <i>BTRC</i>     | beta-transducin repeat containing E3 ubiquitin protein ligase                                    | ENSG00000166167 | 10 | Rare Single Gene Mutation                                             |
| <i>C12orf57</i> | Chromosome 12 open reading frame 57                                                              | ENSG00000111678 | 12 | Rare Single Gene Mutation, Syndromic                                  |
| <i>C15orf62</i> | chromosome 15 open reading frame 62                                                              | ENSG00000188277 | 15 | Rare Single Gene Mutation                                             |
| <i>C4B</i>      | complement component 4B                                                                          | ENSG00000203710 | 6  | Rare Single Gene Mutation, Genetic Association, Functional            |
| <i>CA6</i>      | carbonic anhydrase VI                                                                            | ENSG00000131686 | 1  | Rare Single Gene Mutation                                             |
| <i>CACNA1A</i>  | Calcium channel, voltage-dependent, P/Q type, alpha 1A subunit                                   | ENSG00000141837 | 19 | Rare Single Gene Mutation, Genetic Association                        |
| <i>CACNA1B</i>  | calcium voltage-gated channel subunit alpha1 B                                                   | ENSG00000148408 | 9  | Rare Single Gene Mutation, Syndromic, Genetic Association             |
| <i>CACNA1C</i>  | calcium channel, voltage-dependent, L type, alpha 1C subunit                                     | ENSG00000151067 | 12 | Rare Single Gene Mutation, Syndromic, Genetic Association, Functional |
| <i>CACNA1D</i>  | calcium channel, voltage-dependent, L type, alpha 1D                                             | ENSG00000157388 | 3  | Rare Single Gene Mutation, Syndromic, Genetic Association, Functional |
| <i>CACNA1E</i>  | calcium voltage-gated channel subunit alpha1 E                                                   | ENSG00000198216 | 1  | Rare Single Gene Mutation                                             |
| <i>CACNA1F</i>  | calcium channel, voltage-dependent, alpha 1F                                                     | ENSG00000102001 | X  | Rare Single Gene Mutation, Genetic Association                        |

|                 |                                                               |                 |    |                                                                       |
|-----------------|---------------------------------------------------------------|-----------------|----|-----------------------------------------------------------------------|
| <i>CACNA1G</i>  | calcium channel, voltage-dependent, T type, alpha 1G subunit  | ENSG00000006283 | 17 | Rare Single Gene Mutation, Syndromic, Genetic Association             |
| <i>BRINP3</i>   | BMP/retinoic acid inducible neural specific                   | ENSG00000162670 | 13 | Rare Single Gene Mutation, Functional                                 |
| <i>CACNA1H</i>  | calcium channel, voltage-dependent, alpha 1H subunit          | ENSG00000196557 | 16 | Rare Single Gene Mutation                                             |
| <i>CACNA1I</i>  | Calcium channel, voltage-dependent, T type, alpha 1I subunit  | ENSG00000100346 | 22 | Rare Single Gene Mutation, Genetic Association                        |
| <i>CACNA2D1</i> | calcium voltage-gated channel auxiliary subunit alpha2delta 1 | ENSG00000153956 | 7  | Rare Single Gene Mutation                                             |
| <i>CACNA2D3</i> | Calcium channel, voltage-dependent, alpha 2/delta subunit 3   | ENSG00000157445 | 3  | Rare Single Gene Mutation                                             |
| <i>CACNB2</i>   | Calcium channel, voltage-dependent, beta 2 subunit            | ENSG00000165995 | 10 | Rare Single Gene Mutation, Genetic Association                        |
| <i>CADMI</i>    | cell adhesion molecule 1                                      | ENSG00000182985 | 11 | Rare Single Gene Mutation                                             |
| <i>CADM2</i>    | Cell adhesion molecule 2                                      | ENSG00000175161 | 3  | Rare Single Gene Mutation, Genetic Association                        |
| <i>CADPS</i>    | calcium dependent secretion activator                         | ENSG00000163618 | 3  | Rare Single Gene Mutation, Genetic Association                        |
| <i>CADPS2</i>   | Ca <sup>2+</sup> -dependent activator protein for secretion 2 | ENSG00000081803 | 7  | Rare Single Gene Mutation, Functional                                 |
| <i>CAMK2A</i>   | calcium/calmodulin dependent protein kinase II alpha          | ENSG00000070808 | 5  | Rare Single Gene Mutation, Syndromic, Genetic Association, Functional |
| <i>CAMK2B</i>   | calcium/calmodulin dependent protein kinase II beta           | ENSG00000058404 | 7  | Rare Single Gene Mutation, Syndromic                                  |
| <i>CAPN12</i>   | Calpain 12                                                    | ENSG00000182472 | 19 | Rare Single Gene Mutation                                             |

|                 |                                                    |                 |    |                                                            |
|-----------------|----------------------------------------------------|-----------------|----|------------------------------------------------------------|
| <i>CAPRIN1</i>  | Cell cycle associated protein 1                    | ENSG00000135387 | 11 | Rare Single Gene Mutation, Functional                      |
| <i>CARD11</i>   | caspase recruitment domain family member           | ENSG00000198286 | 7  | Rare Single Gene Mutation                                  |
| <i>CASC4</i>    | cancer susceptibility candidate 4                  | ENSG00000166734 | 15 | Rare Single Gene Mutation                                  |
| <i>CASK</i>     | calcium/calmodulin dependent serine protein kinase | ENSG00000147044 | X  | Rare Single Gene Mutation, Syndromic                       |
| <i>CASZ1</i>    | castor zinc finger 1                               | ENSG00000130940 | 1  | Rare Single Gene Mutation                                  |
| <i>CC2D1A</i>   | Coiled-coil and C2 domain containing 1A            | ENSG00000132024 | 19 | Rare Single Gene Mutation, Functional                      |
| <i>CCDC88C</i>  | Coiled-coil domain containing 88C                  | ENSG00000015133 | 14 | Rare Single Gene Mutation                                  |
| <i>CCDC91</i>   | coiled-coil domain containing 91                   | ENSG00000123106 | 12 | Rare Single Gene Mutation                                  |
| <i>CCIN</i>     | calicin                                            | ENSG00000185972 | 9  | Rare Single Gene Mutation                                  |
| <i>CCNG1</i>    | cyclin G1                                          | ENSG00000113328 | 5  | Rare Single Gene Mutation                                  |
| <i>CCNK</i>     | cyclin K                                           | ENSG00000090061 | 14 | Rare Single Gene Mutation, Syndromic                       |
| <i>CCSER1</i>   | coiled-coil serine rich protein 1                  | ENSG00000184305 | 4  | Rare Single Gene Mutation                                  |
| <i>CCT4</i>     | Chaperonin containing TCP1, subunit 4 (delta)      | ENSG00000115484 | 2  | Rare Single Gene Mutation                                  |
| <i>CD276</i>    | CD276 molecule                                     | ENSG00000103855 | 15 | Rare Single Gene Mutation                                  |
| <i>CD38</i>     | CD38 molecule                                      | ENSG00000004468 | 4  | Rare Single Gene Mutation, Genetic Association, Functional |
| <i>CDC42BPB</i> | CDC42 binding protein kinase beta (DMPK-like)      | ENSG00000198752 | 14 | Rare Single Gene Mutation, Syndromic                       |
| <i>CDH10</i>    | cadherin 10, type 2 (T2-cadherin)                  | ENSG00000040731 | 5  | Rare Single Gene Mutation, Genetic Association             |
| <i>CDH11</i>    | cadherin 11                                        | ENSG00000140937 | 16 | Rare Single Gene Mutation                                  |
| <i>CDH13</i>    | cadherin 13                                        | ENSG00000140945 | 16 | Rare Single Gene Mutation                                  |
| <i>CDH8</i>     | cadherin 8, type 2                                 | ENSG00000150394 | 16 | Rare Single Gene Mutation                                  |



|               |                                                        |                 |    |                                                |
|---------------|--------------------------------------------------------|-----------------|----|------------------------------------------------|
| <i>CDH9</i>   | cadherin 9, type 2 (T1-cadherin)                       | ENSG00000113100 | 5  | Rare Single Gene Mutation, Genetic Association |
| <i>CDK13</i>  | cyclin dependent kinase 13                             | ENSG00000065883 | 7  | Rare Single Gene Mutation, Syndromic           |
| <i>CACNB1</i> | calcium voltage-gated channel auxiliary subunit beta 1 | ENSG00000067191 | 17 | Rare Single Gene Mutation                      |
| <i>CDKL5</i>  | cyclin-dependent kinase-like 5                         | ENSG00000008086 | X  | Rare Single Gene Mutation, Syndromic           |
| <i>CDON</i>   | cell adhesion associated, oncogene regulated           | ENSG00000064309 | 11 | Rare Single Gene Mutation                      |
| <i>CECR2</i>  | CECR2, histone acetyl-lysine reader                    | ENSG00000099954 | 22 | Rare Single Gene Mutation                      |
| <i>CELF4</i>  | CUGBP, Elav-like family member 4                       | ENSG00000101489 | 18 | Rare Single Gene Mutation, Functional          |
| <i>CELF6</i>  | CUGBP, Elav-like family member 6                       | ENSG00000140488 | 15 | Rare Single Gene Mutation, Genetic Association |
| <i>CEP135</i> | centrosomal protein 135                                | ENSG00000174799 | 4  | Rare Single Gene Mutation, Syndromic           |
| <i>CEP290</i> | Centrosomal protein 290kDa                             | ENSG00000198707 | 12 | Rare Single Gene Mutation, Syndromic           |
| <i>CEP41</i>  | testis specific, 14                                    | ENSG00000106477 | 7  | Rare Single Gene Mutation, Syndromic           |
| <i>CGNL1</i>  | Cingulin-like 1                                        | ENSG00000128849 | 15 | Rare Single Gene Mutation                      |
| <i>CHAMP1</i> | chromosome alignment maintaining phosphoprotein 1      | ENSG00000198824 | 13 | Rare Single Gene Mutation, Syndromic           |
| <i>CHD1</i>   | chromodomain helicase DNA binding protein 1            | ENSG00000153922 | 5  | Rare Single Gene Mutation                      |
| <i>CHD2</i>   | Chromodomain helicase DNA binding protein 2            | ENSG00000173575 | 15 | Rare Single Gene Mutation, Syndromic           |
| <i>CHD3</i>   | chromodomain helicase DNA binding protein 3            | ENSG00000170004 | 17 | Rare Single Gene Mutation, Syndromic           |
| <i>CHD7</i>   | chromodomain helicase DNA binding protein 7            | ENSG00000171316 | 8  | Rare Single Gene Mutation, Syndromic           |

|               |                                                                                            |                 |    |                                                  |
|---------------|--------------------------------------------------------------------------------------------|-----------------|----|--------------------------------------------------|
| <i>CHD8</i>   | chromodomain helicase<br>DNA binding protein 8                                             | ENSG00000100888 | 14 | Rare Single Gene Mutation, Syndromic, Functional |
| <i>CHKB</i>   | Choline kinase beta                                                                        | ENSG00000100288 | 22 | Rare Single Gene Mutation, Syndromic             |
| <i>CHM</i>    | CHMRab escort protein                                                                      | ENSG00000188419 | X  | Rare Single Gene Mutation                        |
| <i>CHMP1A</i> | charged multivesicular<br>body protein 1A                                                  | ENSG00000131165 | 16 | Rare Single Gene Mutation, Syndromic             |
| <i>CHRM3</i>  | cholinergic receptor<br>muscarinic 3                                                       | ENSG00000133019 | 1  | Rare Single Gene Mutation, Genetic Association   |
| <i>CHRNA7</i> | cholinergic receptor,<br>nicotinic, alpha 7                                                | ENSG00000175344 | 15 | Rare Single Gene Mutation                        |
| <i>CHRNB3</i> | cholinergic receptor<br>nicotinic beta 3 subunit                                           | ENSG00000147432 | 8  | Rare Single Gene Mutation                        |
| <i>CIB2</i>   | Calcium and integrin<br>binding family member 2                                            | ENSG00000136425 | 15 | Rare Single Gene Mutation                        |
| <i>CIC</i>    | capicua transcriptional<br>repressor                                                       | ENSG00000079432 | 19 | Rare Single Gene Mutation, Functional            |
| <i>CLASP1</i> | cytoplasmic linker<br>associated protein 1                                                 | ENSG00000074054 | 2  | Rare Single Gene Mutation                        |
| <i>CLCN4</i>  | chloride voltage-gated<br>channel 4                                                        | ENSG00000073464 | X  | Rare Single Gene Mutation, Syndromic             |
| <i>CLN8</i>   | Ceroid-lipofuscinosis,<br>neuronal 8 (epilepsy,<br>progressive with mental<br>retardation) | ENSG00000182372 | 8  | Rare Single Gene Mutation, Syndromic             |
| <i>CLTCL1</i> | clathrin, heavy chain-like<br>1                                                            | ENSG00000070371 | 22 | Rare Single Gene Mutation                        |
| <i>CMIP</i>   | c-Maf inducing protein                                                                     | ENSG00000153815 | 16 | Rare Single Gene Mutation, Genetic Association   |
| <i>CMPK2</i>  | cytidine/uridine<br>monophosphate kinase 2                                                 | ENSG00000134326 | 2  | Rare Single Gene Mutation                        |
| <i>CNGB3</i>  | cyclic nucleotide gated<br>channel beta 3                                                  | ENSG00000170289 | 8  | Rare Single Gene Mutation                        |

|                |                                                        |                 |    |                                                           |
|----------------|--------------------------------------------------------|-----------------|----|-----------------------------------------------------------|
| <i>CNKSR2</i>  | connector enhancer of<br>kinase suppressor of Ras<br>2 | ENSG00000149970 | X  | Rare Single Gene Mutation, Syndromic                      |
| <i>CNOT3</i>   | CCR4-NOT transcription<br>complex subunit 3            | ENSG00000088038 | 19 | Rare Single Gene Mutation, Syndromic                      |
| <i>CNR1</i>    | cannabinoid receptor 1<br>(brain)                      | ENSG00000118432 | 6  | Rare Single Gene Mutation, Genetic Association            |
| <i>CNTN3</i>   | contactin 3                                            | ENSG00000113805 | 3  | Rare Single Gene Mutation                                 |
| <i>CNTN4</i>   | contactin 4                                            | ENSG00000144619 | 3  | Rare Single Gene Mutation, Syndromic, Genetic Association |
| <i>CNTN5</i>   | Contactin 5                                            | ENSG00000149972 | 11 | Rare Single Gene Mutation, Genetic Association            |
| <i>CNTN6</i>   | Contactin 6                                            | ENSG00000134115 | 3  | Rare Single Gene Mutation, Genetic Association            |
| <i>CNTNAP2</i> | contactin associated<br>protein-like 2                 | ENSG00000174469 | 7  | Rare Single Gene Mutation, Syndromic, Genetic Association |
| <i>CNTNAP3</i> | contactin associated<br>protein-like 3                 | ENSG00000106714 | 9  | Rare Single Gene Mutation, Functional                     |
| <i>CNTNAP4</i> | Contactin associated<br>protein-like 4                 | ENSG00000152910 | 16 | Rare Single Gene Mutation, Functional                     |
| <i>CNTNAP5</i> | contactin associated<br>protein-like 5                 | ENSG00000155052 | 2  | Rare Single Gene Mutation, Genetic Association            |
| <i>COL28A1</i> | collagen type XXVIII<br>alpha 1 chain                  | ENSG00000215018 | 7  | Rare Single Gene Mutation                                 |
| <i>CPT2</i>    | carnitine<br>palmitoyltransferase 2                    | ENSG00000157184 | 1  | Rare Single Gene Mutation                                 |
| <i>CPZ</i>     | carboxypeptidase Z                                     | ENSG00000109625 | 4  | Rare Single Gene Mutation                                 |
| <i>CREBBP</i>  | CREB binding protein                                   | ENSG00000005339 | 16 | Rare Single Gene Mutation, Syndromic, Genetic Association |
| <i>CNOT1</i>   | CCR4-NOT transcription<br>complex subunit 1            | ENSG00000125107 | 16 | Rare Single Gene Mutation, Syndromic                      |
| <i>CORO1A</i>  | coronin 1A                                             | ENSG00000102879 | 16 | Rare Single Gene Mutation                                 |
| <i>CSDE1</i>   | cold shock domain<br>containing E1                     | ENSG00000009307 | 1  | Rare Single Gene Mutation, Syndromic                      |
| <i>CSMD1</i>   | CUB and Sushi multiple<br>domains 1                    | ENSG00000183117 | 8  | Rare Single Gene Mutation, Genetic Association            |
| <i>CSNK1E</i>  | casein kinase 1 epsilon                                | ENSG00000213923 | 22 | Rare Single Gene Mutation, Functional                     |

|                |                                                         |                 |    |                                                            |
|----------------|---------------------------------------------------------|-----------------|----|------------------------------------------------------------|
| <i>CSNK2A1</i> | casein kinase 2 alpha 1                                 | ENSG00000101266 | 20 | Rare Single Gene Mutation, Syndromic                       |
| <i>CTCF</i>    | CCCTC-binding factor                                    | ENSG00000102974 | 16 | Rare Single Gene Mutation, Syndromic, Functional           |
| <i>CTNNA3</i>  | catenin (cadherin-associated protein), alpha 3          | ENSG00000183230 | 10 | Rare Single Gene Mutation, Genetic Association             |
| <i>CTNNB1</i>  | catenin beta 1                                          | ENSG00000168036 | 3  | Rare Single Gene Mutation, Syndromic                       |
| <i>CTNND2</i>  | Catenin (cadherin-associated protein), delta 2          | ENSG00000169862 | 5  | Rare Single Gene Mutation                                  |
| <i>CTTNBP2</i> | cortactin binding protein                               | ENSG00000077063 | 7  | Rare Single Gene Mutation, Syndromic, Functional           |
| <i>CUL3</i>    | Cullin 3                                                | ENSG00000036257 | 2  | Rare Single Gene Mutation, Genetic Association             |
| <i>CUL7</i>    | Cullin 7                                                | ENSG00000044090 | 6  | Rare Single Gene Mutation                                  |
| <i>CUX1</i>    | cut like homeobox 1                                     | ENSG00000257923 | 7  | Rare Single Gene Mutation, Functional                      |
| <i>CUX2</i>    | cut like homeobox 2                                     | ENSG00000111249 | 12 | Rare Single Gene Mutation, Syndromic                       |
| <i>CX3CR1</i>  | Chemokine (C-X3-C motif) receptor 1                     | ENSG00000168329 | 3  | Rare Single Gene Mutation, Functional                      |
| <i>CYFIP1</i>  | cytoplasmic FMR1 interacting protein 1                  | ENSG00000273749 | 15 | Rare Single Gene Mutation, Genetic Association, Functional |
| <i>CYLC2</i>   | cylicin, basic protein of sperm head cytoskeleton 2     | ENSG00000155833 | 9  | Rare Single Gene Mutation                                  |
| <i>CYP27A1</i> | cytochrome P450 family 27 subfamily A member 1          | ENSG00000135929 | 2  | Rare Single Gene Mutation, Syndromic                       |
| <i>DAGLA</i>   | diacylglycerol lipase alpha                             | ENSG00000134780 | 11 | Rare Single Gene Mutation, Functional                      |
| <i>DAPP1</i>   | Dual adaptor of phosphotyrosine and 3-phosphoinositides | ENSG00000070190 | 4  | Rare Single Gene Mutation                                  |
| <i>DDX3X</i>   | DEAD (Asp-Glu-Ala-Asp) box helicase 3, X-linked         | ENSG00000215301 | X  | Rare Single Gene Mutation, Syndromic                       |
| <i>DDX53</i>   | DEAD (Asp-Glu-Ala-Asp) box polypeptide 53               | ENSG00000184735 | X  | Rare Single Gene Mutation                                  |

|               |                                                         |                 |    |                                                            |
|---------------|---------------------------------------------------------|-----------------|----|------------------------------------------------------------|
| <i>DEAF1</i>  | DEAF1 transcription factor                              | ENSG00000177030 | 11 | Rare Single Gene Mutation, Syndromic                       |
| <i>DENR</i>   | density-regulated protein                               | ENSG00000139726 | 12 | Rare Single Gene Mutation                                  |
| <i>DEPDC5</i> | DEP domain containing 5                                 | ENSG00000100150 | 22 | Rare Single Gene Mutation, Syndromic                       |
| <i>DHCR7</i>  | 7-dehydrocholesterol reductase                          | ENSG00000172893 | 11 | Rare Single Gene Mutation, Syndromic                       |
| <i>DHX30</i>  | DExH-box helicase 30                                    | ENSG00000132153 | 3  | Rare Single Gene Mutation, Syndromic                       |
| <i>DIP2A</i>  | DIP2 disco-interacting protein 2 homolog A (Drosophila) | ENSG00000160305 | 21 | Rare Single Gene Mutation, Functional                      |
| <i>DIP2C</i>  | disco interacting protein 2 homolog C                   | ENSG00000151240 | 10 | Rare Single Gene Mutation                                  |
| <i>DISC1</i>  | disrupted in schizophrenia 1                            | ENSG00000162946 | 1  | Rare Single Gene Mutation, Syndromic, Genetic Association  |
| <i>DIPK2A</i> | divergent protein kinase domain 2A                      | ENSG00000181744 | 3  | Rare Single Gene Mutation                                  |
| <i>DDHD2</i>  | DDHD domain containing 2                                | ENSG00000085788 | 8  | Rare Single Gene Mutation, Genetic Association, Functional |
| <i>DIXDC1</i> | DIX domain containing 1                                 | ENSG00000150764 | 11 | Rare Single Gene Mutation, Functional                      |
| <i>DLG1</i>   | discs large MAGUK scaffold protein 1                    | ENSG00000075711 | 3  | Rare Single Gene Mutation                                  |
| <i>DLG2</i>   | discs large MAGUK scaffold protein 2                    | ENSG00000150672 | 11 | Rare Single Gene Mutation                                  |
| <i>DLG4</i>   | discs large MAGUK scaffold protein 4                    | ENSG00000132535 | 17 | Rare Single Gene Mutation, Syndromic, Functional           |
| <i>DLGAP1</i> | DLG associated protein 1 discs, large (Drosophila)      | ENSG00000170579 | 18 | Rare Single Gene Mutation, Functional                      |
| <i>DLGAP2</i> | homolog-associated protein 2                            | ENSG00000198010 | 8  | Rare Single Gene Mutation                                  |
| <i>DLGAP3</i> | DLG associated protein 3                                | ENSG00000116544 | 1  | Rare Single Gene Mutation, Genetic Association, Functional |
| <i>DLL1</i>   | delta like canonical Notch ligand 1                     | ENSG00000198719 | 6  | Rare Single Gene Mutation, Syndromic                       |
| <i>DLX3</i>   | distal-less homeobox 3                                  | ENSG00000064195 | 17 | Rare Single Gene Mutation                                  |

|               |                                                            |                 |    |                                                            |
|---------------|------------------------------------------------------------|-----------------|----|------------------------------------------------------------|
| <i>DLX6</i>   | distal-less homeobox 6                                     | ENSG00000006377 | 7  | Rare Single Gene Mutation                                  |
| <i>DMD</i>    | dystrophin (muscular dystrophy, Duchenne and Becker types) | ENSG00000198947 | X  | Rare Single Gene Mutation, Syndromic, Genetic Association  |
| <i>DMPK</i>   | dystrophia myotonica-protein kinase                        | ENSG00000104936 | 19 | Rare Single Gene Mutation, Syndromic                       |
| <i>DMWD</i>   | DM1 locus, WD repeat containing                            | ENSG00000185800 | 19 | Rare Single Gene Mutation                                  |
| <i>DMXL2</i>  | Dmx-like 2                                                 | ENSG00000104093 | 15 | Rare Single Gene Mutation                                  |
| <i>DNAH10</i> | Dynein, axonemal, heavy chain 10                           | ENSG00000197653 | 12 | Rare Single Gene Mutation                                  |
| <i>DNAH17</i> | dynein axonemal heavy chain 17                             | ENSG00000187775 | 17 | Rare Single Gene Mutation, Genetic Association             |
| <i>DNAH3</i>  | dynein axonemal heavy chain 3                              | ENSG00000158486 | 16 | Rare Single Gene Mutation                                  |
| <i>DNER</i>   | Delta/notch-like EGF repeat containing                     | ENSG00000187957 | 2  | Rare Single Gene Mutation, Genetic Association             |
| <i>DNMT3A</i> | DNA (cytosine-5)-methyltransferase 3 alpha                 | ENSG00000119772 | 2  | Rare Single Gene Mutation, Syndromic, Genetic Association  |
| <i>DOCK1</i>  | Dedicator of cytokinesis 1                                 | ENSG00000150760 | 10 | Rare Single Gene Mutation                                  |
| <i>DOCK4</i>  | Dedicator of cytokinesis 4                                 | ENSG00000128512 | 7  | Rare Single Gene Mutation, Genetic Association, Functional |
| <i>DOCK8</i>  | dedicator of cytokinesis 8                                 | ENSG00000107099 | 9  | Rare Single Gene Mutation                                  |
| <i>DPP10</i>  | Dipeptidyl-peptidase 10                                    | ENSG00000175497 | 2  | Rare Single Gene Mutation, Genetic Association             |
| <i>DPP3</i>   | dipeptidyl peptidase 3                                     | ENSG00000254986 | 11 | Rare Single Gene Mutation                                  |
| <i>DPP4</i>   | Dipeptidyl-peptidase 4                                     | ENSG00000197635 | 2  | Rare Single Gene Mutation, Genetic Association             |
| <i>DPP6</i>   | dipeptidyl-peptidase 6                                     | ENSG00000130226 | 7  | Rare Single Gene Mutation, Genetic Association, Functional |
| <i>DPYD</i>   | dihydropyrimidine dehydrogenase                            | ENSG00000188641 | 1  | Rare Single Gene Mutation, Syndromic, Genetic Association  |
| <i>DPYSL2</i> | dihydropyrimidinase like 2                                 | ENSG00000092964 | 8  | Rare Single Gene Mutation, Genetic Association, Functional |

|                |                                                                          |                 |    |                                                  |
|----------------|--------------------------------------------------------------------------|-----------------|----|--------------------------------------------------|
| <i>DPYSL3</i>  | dihydropyrimidinase like<br>3                                            | ENSG00000113657 | 5  | Rare Single Gene Mutation                        |
| <i>DRD2</i>    | Dopamine receptor D2                                                     | ENSG00000149295 | 11 | Rare Single Gene Mutation, Genetic Association   |
| <i>DRD3</i>    | dopamine receptor D3                                                     | ENSG00000151577 | 3  | Rare Single Gene Mutation, Genetic Association   |
| <i>DSCAM</i>   | Down syndrome cell<br>adhesion molecule                                  | ENSG00000171587 | 21 | Rare Single Gene Mutation, Genetic Association   |
| <i>DST</i>     | Dystonin                                                                 | ENSG00000151914 | 6  | Rare Single Gene Mutation                        |
| <i>DUSP15</i>  | dual specificity<br>phosphatase 15                                       | ENSG00000149599 | 20 | Rare Single Gene Mutation, Genetic Association   |
| <i>DVL3</i>    | Dishevelled segment<br>polarity protein 3                                | ENSG00000161202 | 3  | Rare Single Gene Mutation, Functional            |
| <i>DYDC1</i>   | DPY30 domain<br>containing 1                                             | ENSG00000170788 | 10 | Rare Single Gene Mutation                        |
| <i>DYDC2</i>   | DPY30 domain<br>containing 2                                             | ENSG00000133665 | 10 |                                                  |
| <i>DYNC1H1</i> | dynein cytoplasmic 1<br>heavy chain 1                                    | ENSG00000197102 | 14 | Rare Single Gene Mutation, Syndromic             |
| <i>DYRK1A</i>  | Dual-specificity tyrosine-<br>(Y)-phosphorylation<br>regulated kinase 1A | ENSG00000157540 | 21 | Rare Single Gene Mutation, Syndromic, Functional |
| <i>EBF3</i>    | early B-cell factor 3                                                    | ENSG00000108001 | 10 | Rare Single Gene Mutation, Syndromic             |
| <i>EEF1A2</i>  | Eukaryotic translation<br>elongation factor 1 alpha<br>2                 | ENSG00000101210 | 20 | Rare Single Gene Mutation, Syndromic             |
| <i>EFR3A</i>   | EFR3 homolog A (S.<br>cerevisiae)                                        | ENSG00000132294 | 8  | Rare Single Gene Mutation                        |
| <i>EGR3</i>    | early growth response 3                                                  | ENSG00000179388 | 8  | Rare Single Gene Mutation                        |
| <i>EHMT1</i>   | Euchromatic histone-<br>lysine N-<br>methyltransferase 1                 | ENSG00000181090 | 9  | Rare Single Gene Mutation, Syndromic, Functional |
| <i>EIF3G</i>   | eukaryotic translation<br>initiation factor 3 subunit<br>G               | ENSG00000130811 | 19 | Rare Single Gene Mutation                        |

|               |                                                    |                 |    |                                                            |
|---------------|----------------------------------------------------|-----------------|----|------------------------------------------------------------|
| <i>EIF4E</i>  | eukaryotic translation initiation factor 4E        | ENSG00000151247 | 4  | Rare Single Gene Mutation, Genetic Association             |
| <i>EIF4G1</i> | eukaryotic translation initiation factor 4 gamma 1 | ENSG00000114867 | 3  | Rare Single Gene Mutation, Functional                      |
| <i>ELAVL2</i> | ELAV like neuron-specific RNA binding protein 2    | ENSG00000107105 | 9  | Rare Single Gene Mutation, Genetic Association, Functional |
| <i>ELAVL3</i> | ELAV like neuron-specific RNA binding protein 3    | ENSG00000196361 | 19 | Rare Single Gene Mutation                                  |
| <i>ELP4</i>   | Elongator acetyltransferase complex subunit 4      | ENSG00000109911 | 11 | Rare Single Gene Mutation, Genetic Association             |
| <i>EN2</i>    | engrailed homolog 2                                | ENSG00000164778 | 7  | Rare Single Gene Mutation, Genetic Association, Functional |
| <i>EP300</i>  | E1A binding protein p300                           | ENSG00000100393 | 22 | Rare Single Gene Mutation, Syndromic                       |
| <i>EMSY</i>   | EMSY, BRCA2 interacting transcriptional repressor  | ENSG00000158636 | 11 | Rare Single Gene Mutation, Functional                      |
| <i>EP400</i>  | E1A binding protein p400                           | ENSG00000183495 | 12 | Rare Single Gene Mutation                                  |
| <i>EPC2</i>   | Enhancer of polycomb homolog 2 (Drosophila)        | ENSG00000135999 | 2  | Rare Single Gene Mutation                                  |
| <i>EPHB2</i>  | EPH receptor B2                                    | ENSG00000133216 | 1  | Rare Single Gene Mutation                                  |
| <i>EPPK1</i>  | epiplakin 1                                        | ENSG00000261150 | 8  | Rare Single Gene Mutation                                  |
| <i>ERMN</i>   | ermin                                              | ENSG00000136541 | 2  | Rare Single Gene Mutation                                  |
| <i>ESR2</i>   | estrogen receptor 2 (ER beta)                      | ENSG00000140009 | 14 | Rare Single Gene Mutation, Syndromic, Genetic Association  |
| <i>ESRRB</i>  | estrogen-related receptor beta                     | ENSG00000119715 | 14 | Rare Single Gene Mutation, Genetic Association             |
| <i>ETFB</i>   | Electron-transfer-flavoprotein, beta polypeptide   | ENSG00000105379 | 19 | Rare Single Gene Mutation                                  |



|               |                                                     |                 |    |                                                                       |
|---------------|-----------------------------------------------------|-----------------|----|-----------------------------------------------------------------------|
| <i>EXOC3</i>  | exocyst complex component 3                         | ENSG00000180104 | 5  | Rare Single Gene Mutation                                             |
| <i>EXOC5</i>  | exocyst complex component 5                         | ENSG00000070367 | 14 | Rare Single Gene Mutation                                             |
| <i>EXOC6</i>  | exocyst complex component 6                         | ENSG00000138190 | 10 | Rare Single Gene Mutation                                             |
| <i>EXOC6B</i> | exocyst complex component 6B                        | ENSG00000144036 | 2  | Rare Single Gene Mutation                                             |
| <i>EXT1</i>   | Exostosin 1                                         | ENSG00000182197 | 8  | Rare Single Gene Mutation, Genetic Association                        |
| <i>FABP5</i>  | fatty acid binding protein 5 (psoriasis-associated) | ENSG00000164687 | 8  | Rare Single Gene Mutation, Functional                                 |
| <i>ERBIN</i>  | erbB2 interacting protein                           | ENSG00000112851 | 5  | Rare Single Gene Mutation                                             |
| <i>FAM47A</i> | family with sequence similarity 47 member A         | ENSG00000185448 | X  | Rare Single Gene Mutation                                             |
| <i>FAM92B</i> | Family with sequence similarity 92, member B        | ENSG00000153789 | 16 | Rare Single Gene Mutation                                             |
| <i>FAM98C</i> | family with sequence similarity 98 member C         | ENSG00000130244 | 19 | Rare Single Gene Mutation                                             |
| <i>FAN1</i>   | FANCD2/FANCI-associated nuclease 1                  | ENSG00000198690 | 15 | Rare Single Gene Mutation, Genetic Association                        |
| <i>FAT1</i>   | FAT atypical cadherin 1                             | ENSG00000083857 | 4  | Rare Single Gene Mutation                                             |
| <i>FBN1</i>   | Fibrillin 1                                         | ENSG00000166147 | 15 | Rare Single Gene Mutation                                             |
| <i>FBXO11</i> | F-box protein 11                                    | ENSG00000138081 | 2  | Rare Single Gene Mutation, Syndromic                                  |
| <i>FBXO40</i> | F-box protein 40                                    | ENSG00000163833 | 3  | Rare Single Gene Mutation, Genetic Association                        |
| <i>FCRL6</i>  | Fc receptor like 6                                  | ENSG00000181036 | 1  | Rare Single Gene Mutation                                             |
| <i>FEZF2</i>  | FEZ family zinc finger 2                            | ENSG00000153266 | 3  | Rare Single Gene Mutation, Genetic Association                        |
| <i>FGA</i>    | Fibrinogen alpha chain                              | ENSG00000171560 | 4  | Rare Single Gene Mutation, Genetic Association                        |
| <i>FHIT</i>   | fragile histidine triad                             | ENSG00000189283 | 3  | Rare Single Gene Mutation, Genetic Association                        |
| <i>FMRI</i>   | fragile X mental retardation 1                      | ENSG00000102081 | X  | Rare Single Gene Mutation, Syndromic, Genetic Association, Functional |
| <i>FOXP1</i>  | Forkhead box G1                                     | ENSG00000176165 | 14 | Rare Single Gene Mutation, Syndromic, Genetic Association             |
| <i>FOXP1</i>  | forkhead box P1                                     | ENSG00000114861 | 3  | Rare Single Gene Mutation, Syndromic, Genetic Association, Functional |

|                |                                                    |                 |    |                                                                       |
|----------------|----------------------------------------------------|-----------------|----|-----------------------------------------------------------------------|
|                | ectonucleotide                                     |                 |    |                                                                       |
| <i>ENPP1</i>   | pyrophosphatase/phosphodiesterase 1                | ENSG00000197594 | 6  | Rare Single Gene Mutation                                             |
| <i>FGF14</i>   | fibroblast growth factor 14                        | ENSG00000102466 | 13 | Rare Single Gene Mutation                                             |
| <i>FOXP2</i>   | forkhead box P2                                    | ENSG00000128573 | 7  | Rare Single Gene Mutation, Genetic Association                        |
| <i>FRK</i>     | fyn-related kinase                                 | ENSG00000111816 | 6  | Rare Single Gene Mutation, Genetic Association                        |
| <i>FRMPD4</i>  | FERM and PDZ domain containing 4                   | ENSG00000169933 | X  | Rare Single Gene Mutation, Syndromic                                  |
| <i>GABBR2</i>  | gamma-aminobutyric acid type B receptor subunit 2  | ENSG00000136928 | 9  | Rare Single Gene Mutation, Syndromic, Genetic Association, Functional |
| <i>GABRA3</i>  | Gamma-aminobutyric acid (GABA) A receptor, alpha 3 | ENSG00000011677 | X  | Rare Single Gene Mutation                                             |
| <i>GABRA4</i>  | gamma-aminobutyric acid (GABA) A receptor, alpha 4 | ENSG00000109158 | 4  | Rare Single Gene Mutation, Genetic Association, Functional            |
| <i>GABRB3</i>  | gamma-aminobutyric acid (GABA) A receptor, beta 3  | ENSG00000166206 | 15 | Rare Single Gene Mutation, Genetic Association                        |
| <i>GALNT13</i> | polypeptide N-acetylgalactosaminyltransferase 13   | ENSG00000144278 | 2  | Rare Single Gene Mutation                                             |
| <i>GALNT14</i> | polypeptide N-acetylgalactosaminyltransferase 14   | ENSG00000158089 | 2  | Rare Single Gene Mutation, Genetic Association                        |
| <i>GALNT8</i>  | polypeptide N-acetylgalactosaminyltransferase 8    | ENSG00000130035 | 12 | Rare Single Gene Mutation                                             |
| <i>GDA</i>     | guanine deaminase                                  | ENSG00000119125 | 9  | Rare Single Gene Mutation, Genetic Association                        |
| <i>GGNBP2</i>  | gametogenetin binding protein 2                    | ENSG00000278311 | 17 | Rare Single Gene Mutation                                             |

|                |                                                                         |                 |    |                                                           |
|----------------|-------------------------------------------------------------------------|-----------------|----|-----------------------------------------------------------|
| <i>GIGYF1</i>  | GRB10 interacting GYF protein 1                                         | ENSG00000146830 | 7  | Rare Single Gene Mutation                                 |
| <i>GIGYF2</i>  | GRB10 interacting GYF protein 2                                         | ENSG00000204120 | 2  | Rare Single Gene Mutation                                 |
| <i>GLIS1</i>   | GLIS family zinc finger 1                                               | ENSG00000174332 | 1  | Rare Single Gene Mutation, Genetic Association            |
| <i>GLO1</i>    | glyoxalase I                                                            | ENSG00000124767 | 6  | Rare Single Gene Mutation, Genetic Association            |
| <i>GLRA2</i>   | glycine receptor, alpha 2                                               | ENSG00000101958 | X  | Rare Single Gene Mutation, Functional                     |
| <i>GNAS</i>    | GNAS complex locus                                                      | ENSG00000087460 | 20 | Rare Single Gene Mutation                                 |
| <i>GNB1L</i>   | guanine nucleotide binding protein (G protein), beta polypeptide 1-like | ENSG00000185838 | 22 | Rare Single Gene Mutation, Genetic Association            |
| <i>GPC4</i>    | glypican 4                                                              | ENSG00000076716 | X  | Rare Single Gene Mutation                                 |
| <i>GPC6</i>    | glypican 6                                                              | ENSG00000183098 | 13 | Rare Single Gene Mutation, Genetic Association            |
| <i>GPD2</i>    | glycerol-3-phosphate dehydrogenase 2                                    | ENSG00000115159 | 2  | Rare Single Gene Mutation, Genetic Association            |
| <i>GPHN</i>    | Gephyrin                                                                | ENSG00000171723 | 14 | Rare Single Gene Mutation                                 |
| <i>GPR37</i>   | G protein-coupled receptor 37                                           | ENSG00000170775 | 7  | Rare Single Gene Mutation                                 |
| <i>GPR85</i>   | G protein-coupled receptor 85                                           | ENSG00000164604 | 7  | Rare Single Gene Mutation, Genetic Association            |
| <i>GRIA1</i>   | glutamate ionotropic receptor AMPA type subunit 1                       | ENSG00000155511 | 5  | Rare Single Gene Mutation                                 |
| <i>GRIA2</i>   | glutamate ionotropic receptor AMPA type subunit 2                       | ENSG00000120251 | 4  | Rare Single Gene Mutation                                 |
| <i>GRID1</i>   | Glutamate receptor, ionotropic, delta 1                                 | ENSG00000182771 | 10 | Rare Single Gene Mutation, Genetic Association            |
| <i>GRID2</i>   | glutamate receptor, ionotropic, delta 2                                 | ENSG00000152208 | 4  | Rare Single Gene Mutation, Syndromic, Genetic Association |
| <i>GRID2IP</i> | Grid2 interacting protein                                               | ENSG00000215045 | 7  | Rare Single Gene Mutation                                 |

|               |                                                         |                 |    |                                                            |
|---------------|---------------------------------------------------------|-----------------|----|------------------------------------------------------------|
| <i>GRIK2</i>  | glutamate ionotropic receptor kainate type subunit 2    | ENSG00000164418 | 6  | Rare Single Gene Mutation, Genetic Association             |
| <i>FXN</i>    | frataxin                                                | ENSG00000165060 | 9  | Rare Single Gene Mutation                                  |
| <i>GABRB2</i> | gamma-aminobutyric acid type A receptor subunit beta2   | ENSG00000145864 | 5  | Rare Single Gene Mutation                                  |
| <i>GFAP</i>   | glial fibrillary acidic protein                         | ENSG00000131095 | 17 | Rare Single Gene Mutation                                  |
| <i>GNAI1</i>  | G protein subunit alpha i1                              | ENSG00000127955 | 7  | Rare Single Gene Mutation                                  |
| <i>GRIK3</i>  | glutamate ionotropic receptor kainate type subunit 3    | ENSG00000163873 | 1  | Rare Single Gene Mutation, Genetic Association             |
| <i>GRIK4</i>  | Glutamate receptor, ionotropic, kainate 4               | ENSG00000149403 | 11 | Rare Single Gene Mutation, Functional                      |
| <i>GRIK5</i>  | Glutamate receptor, ionotropic, kainate 5               | ENSG00000105737 | 19 | Rare Single Gene Mutation                                  |
| <i>GRIN1</i>  | Glutamate receptor, ionotropic, N-methyl D-aspartate 1  | ENSG00000176884 | 9  | Rare Single Gene Mutation, Functional                      |
| <i>GRIN2A</i> | glutamate receptor, ionotropic, N-methyl D-aspartate 2A | ENSG00000183454 | 16 | Rare Single Gene Mutation, Syndromic, Genetic Association  |
| <i>GRIN2B</i> | glutamate receptor, ionotropic, N-methyl D-aspartate 2B | ENSG00000273079 | 12 | Rare Single Gene Mutation, Syndromic, Genetic Association  |
| <i>GRIP1</i>  | glutamate receptor interacting protein 1                | ENSG00000155974 | 12 | Rare Single Gene Mutation                                  |
| <i>GRM5</i>   | glutamate metabotropic receptor 5                       | ENSG00000168959 | 11 | Rare Single Gene Mutation, Genetic Association, Functional |
| <i>GRM7</i>   | Glutamate receptor, metabotropic 7                      | ENSG00000196277 | 3  | Rare Single Gene Mutation, Genetic Association             |

|                 |                                                                |                 |    |                                                           |
|-----------------|----------------------------------------------------------------|-----------------|----|-----------------------------------------------------------|
| <i>GTF2I</i>    | general transcription factor Ii                                | ENSG00000263001 | 7  | Rare Single Gene Mutation, Genetic Association            |
| <i>GUCY1A2</i>  | guanylate cyclase 1 soluble subunit alpha 2                    | ENSG00000152402 | 11 | Rare Single Gene Mutation, Genetic Association            |
| <i>HCFC1</i>    | host cell factor C1<br>Hyperpolarization                       | ENSG00000172534 | X  | Rare Single Gene Mutation, Syndromic                      |
| <i>HCN1</i>     | activated cyclic nucleotide-gated                              | ENSG00000164588 | 5  | Rare Single Gene Mutation, Genetic Association            |
| <i>H2BC11</i>   | potassium channel 1<br>H2B clustered histone                   | ENSG00000124635 | 6  | Rare Single Gene Mutation                                 |
| <i>HDAC4</i>    | histone deacetylase 4                                          | ENSG00000068024 | 2  | Rare Single Gene Mutation, Syndromic, Genetic Association |
| <i>HDLBP</i>    | high density lipoprotein binding protein                       | ENSG00000115677 | 2  | Rare Single Gene Mutation                                 |
| <i>HECTD4</i>   | HECT domain E3 ubiquitin protein ligase 4<br>HECT, C2 and WW   | ENSG00000173064 | 12 | Rare Single Gene Mutation                                 |
| <i>HECW2</i>    | domain containing E3 ubiquitin protein ligase 2                | ENSG00000138411 | 2  | Rare Single Gene Mutation, Syndromic                      |
| <i>HEPACAM</i>  | hepatic and glial cell adhesion molecule                       | ENSG00000165478 | 11 | Rare Single Gene Mutation, Syndromic                      |
| <i>HERC2</i>    | HECT and RLD domain containing E3 ubiquitin protein ligase 2   | ENSG00000128731 | 15 | Rare Single Gene Mutation                                 |
| <i>HIVEP3</i>   | human immunodeficiency virus type I enhancer binding protein 3 | ENSG00000127124 | 1  | Rare Single Gene Mutation, Genetic Association            |
| <i>HLA-DPB1</i> | major histocompatibility complex, class II, DP beta 1          | ENSG00000223865 | 6  | Rare Single Gene Mutation, Genetic Association            |
| <i>HNRNPH2</i>  | heterogeneous nuclear ribonucleoprotein H2                     | ENSG00000126945 | X  | Rare Single Gene Mutation, Syndromic                      |
| <i>HNRNPU</i>   | heterogeneous nuclear ribonucleoprotein U                      | ENSG00000153187 | 1  | Rare Single Gene Mutation, Syndromic, Functional          |

|                 |                                                                                 |                 |    |                                                            |
|-----------------|---------------------------------------------------------------------------------|-----------------|----|------------------------------------------------------------|
| <i>HOMER1</i>   | Homer homolog 1<br>(Drosophila)                                                 | ENSG00000152413 | 5  | Rare Single Gene Mutation, Functional                      |
| <i>HOXA1</i>    | homeobox A1<br>v-Ha-ras Harvey rat                                              | ENSG00000105991 | 7  | Rare Single Gene Mutation, Syndromic, Genetic Association  |
| <i>HRAS</i>     | sarcoma viral oncogene<br>homolog                                               | ENSG00000174775 | 11 | Rare Single Gene Mutation, Syndromic, Genetic Association  |
| <i>HTR1B</i>    | 5-hydroxytryptamine<br>(serotonin) receptor 1B                                  | ENSG00000135312 | 6  | Rare Single Gene Mutation, Genetic Association             |
| <i>HTR3A</i>    | 5-hydroxytryptamine<br>(serotonin) receptor 3A                                  | ENSG00000166736 | 11 | Rare Single Gene Mutation, Genetic Association, Functional |
| <i>HTR3C</i>    | 5-hydroxytryptamine<br>(serotonin) receptor 3,<br>family member C               | ENSG00000178084 | 3  | Rare Single Gene Mutation, Genetic Association             |
| <i>HUWE1</i>    | HECT, UBA and WWE<br>domain containing 1, E3<br>ubiquitin protein ligase        | ENSG00000086758 | X  | Rare Single Gene Mutation, Syndromic                       |
| <i>HYDIN</i>    | HYDIN, axonemal<br>central pair apparatus                                       | ENSG00000157423 | 16 | Rare Single Gene Mutation, Genetic Association             |
| <i>ICA1</i>     | islet cell autoantigen 1                                                        | ENSG00000003147 | 7  | Rare Single Gene Mutation                                  |
| <i>IL1R2</i>    | interleukin 1 receptor,<br>type II                                              | ENSG00000115590 | 2  | Rare Single Gene Mutation                                  |
| <i>IL1RAPL1</i> | interleukin 1 receptor<br>accessory protein-like 1                              | ENSG00000169306 | X  | Rare Single Gene Mutation                                  |
| <i>IL1RAPL2</i> | interleukin 1 receptor<br>accessory protein-like 2                              | ENSG00000189108 | X  | Rare Single Gene Mutation, Genetic Association             |
| <i>ILF2</i>     | Interleukin enhancer<br>binding factor 2                                        | ENSG00000143621 | 1  | Rare Single Gene Mutation                                  |
| <i>IMMP2L</i>   | IMP2 inner mitochondrial<br>membrane peptidase-like<br>( <i>S. cerevisiae</i> ) | ENSG00000184903 | 7  | Rare Single Gene Mutation, Genetic Association, Functional |
| <i>INPP1</i>    | inositol polyphosphate-1-<br>phosphatase                                        | ENSG00000151689 | 2  | Rare Single Gene Mutation, Genetic Association             |

|                |                                                             |                 |    |                                                           |
|----------------|-------------------------------------------------------------|-----------------|----|-----------------------------------------------------------|
| <i>INTS1</i>   | integrator complex subunit 1                                | ENSG00000164880 | 7  | Rare Single Gene Mutation, Syndromic                      |
| <i>INTS6</i>   | Integrator complex subunit 6                                | ENSG00000102786 | 13 | Rare Single Gene Mutation                                 |
| <i>IQGAP3</i>  | IQ motif containing GTPase activating protein 3             | ENSG00000183856 | 1  | Rare Single Gene Mutation                                 |
| <i>IQSEC2</i>  | IQ motif and Sec7 domain 2                                  | ENSG00000124313 | X  | Rare Single Gene Mutation, Syndromic, Functional          |
| <i>IRF2BPL</i> | Interferon regulatory factor 2 binding protein-like         | ENSG00000119669 | 14 | Rare Single Gene Mutation, Syndromic                      |
| <i>ITGB3</i>   | integrin, beta 3 (platelet glycoprotein IIIa, antigen CD61) | ENSG00000259207 | 17 | Rare Single Gene Mutation, Genetic Association            |
| <i>ITPR1</i>   | inositol 1,4,5-trisphosphate receptor type 1                | ENSG00000150995 | 3  | Rare Single Gene Mutation, Genetic Association            |
| <i>ITSN1</i>   | intersectin 1                                               | ENSG00000205726 | 21 | Rare Single Gene Mutation                                 |
| <i>JARID2</i>  | jumonji and AT-rich interaction domain containing 2         | ENSG00000008083 | 6  | Rare Single Gene Mutation, Syndromic, Genetic Association |
| <i>JMJD1C</i>  | jumonji domain containing 1C                                | ENSG00000171988 | 10 | Rare Single Gene Mutation                                 |
| <i>KANK1</i>   | KN motif and ankyrin repeat domains 1                       | ENSG00000107104 | 9  | Rare Single Gene Mutation                                 |
| <i>KANSL1</i>  | KAT8 regulatory NSL complex subunit 1                       | ENSG00000120071 | 17 | Rare Single Gene Mutation, Syndromic                      |
| <i>KAT2B</i>   | K(lysine) acetyltransferase 2B                              | ENSG00000114166 | 3  | Rare Single Gene Mutation                                 |
| <i>KAT6A</i>   | K(lysine) acetyltransferase 6A                              | ENSG00000083168 | 8  | Rare Single Gene Mutation, Syndromic                      |

|                |                                                                                    |                 |    |                                                           |
|----------------|------------------------------------------------------------------------------------|-----------------|----|-----------------------------------------------------------|
| <i>KATNAL1</i> | katanin catalytic subunit A1 like 1                                                | ENSG00000102781 | 13 | Rare Single Gene Mutation, Functional                     |
| <i>KATNAL2</i> | Katanin p60 subunit A-like 2                                                       | ENSG00000167216 | 18 | Rare Single Gene Mutation                                 |
| <i>KCNB1</i>   | potassium voltage-gated channel subfamily B member 1                               | ENSG00000158445 | 20 | Rare Single Gene Mutation, Syndromic                      |
| <i>KCNC1</i>   | potassium voltage-gated channel subfamily C member 1                               | ENSG00000129159 | 11 | Rare Single Gene Mutation                                 |
| <i>KCND2</i>   | potassium voltage-gated channel subfamily D member 2                               | ENSG00000184408 | 7  | Rare Single Gene Mutation, Genetic Association            |
| <i>KCND3</i>   | potassium voltage-gated channel subfamily D member 3                               | ENSG00000171385 | 1  | Rare Single Gene Mutation, Syndromic, Genetic Association |
| <i>KCNJ10</i>  | potassium voltage-gated channel subfamily J member 10                              | ENSG00000177807 | 1  | Rare Single Gene Mutation, Syndromic, Genetic Association |
| <i>KCNJ15</i>  | potassium voltage-gated channel subfamily J member 15                              | ENSG00000157551 | 21 | Rare Single Gene Mutation                                 |
| <i>KCNK7</i>   | potassium two pore domain channel subfamily K member 7                             | ENSG00000173338 | 11 | Rare Single Gene Mutation                                 |
| <i>KCNMA1</i>  | potassium large conductance calcium-activated channel, subfamily M, alpha member 1 | ENSG00000156113 | 10 | Rare Single Gene Mutation, Syndromic                      |
| <i>IGF1</i>    | insulin like growth factor 1                                                       | ENSG00000017427 | 12 | Rare Single Gene Mutation, Functional                     |



|                 |                                                                     |                 |    |                                                           |
|-----------------|---------------------------------------------------------------------|-----------------|----|-----------------------------------------------------------|
| <i>KCNQ2</i>    | potassium voltage-gated channel subfamily Q member 2                | ENSG00000075043 | 20 | Rare Single Gene Mutation, Syndromic, Genetic Association |
| <i>KCNQ3</i>    | potassium voltage-gated channel subfamily Q member 3                | ENSG00000184156 | 8  | Rare Single Gene Mutation, Genetic Association            |
| <i>KCNS3</i>    | potassium voltage-gated channel modifier subfamily S member 3       | ENSG00000170745 | 2  | Rare Single Gene Mutation                                 |
| <i>KCTD13</i>   | Potassium channel tetramerisation domain containing 13              | ENSG00000174943 | 16 | Rare Single Gene Mutation, Functional                     |
| <i>KDM1B</i>    | lysine demethylase 1B                                               | ENSG00000165097 | 6  | Rare Single Gene Mutation                                 |
| <i>KDM4B</i>    | lysine demethylase 4B                                               | ENSG00000127663 | 19 | Rare Single Gene Mutation, Functional                     |
| <i>KDM4C</i>    | lysine demethylase 4C                                               | ENSG00000107077 | 9  | Rare Single Gene Mutation                                 |
| <i>KDM5B</i>    | Lysine (K)-specific demethylase 5B                                  | ENSG00000117139 | 1  | Rare Single Gene Mutation, Syndromic, Functional          |
| <i>KDM5C</i>    | lysine demethylase 5C                                               | ENSG00000126012 | X  | Rare Single Gene Mutation, Syndromic, Functional          |
| <i>KDM6A</i>    | lysine demethylase 6A                                               | ENSG00000147050 | X  | Rare Single Gene Mutation, Syndromic                      |
| <i>KDM6B</i>    | Lysine (K)-specific demethylase 6B                                  | ENSG00000132510 | 17 | Rare Single Gene Mutation, Syndromic                      |
| <i>KHDRBS2</i>  | KH domain containing, RNA binding, signal transduction associated 2 | ENSG00000112232 | 6  | Rare Single Gene Mutation                                 |
| <i>KIAA1586</i> | KIAA1586                                                            | ENSG00000168116 | 6  | Rare Single Gene Mutation                                 |
| <i>KIF13B</i>   | Kinesin family member 13B                                           | ENSG00000197892 | 8  | Rare Single Gene Mutation                                 |
| <i>KIF14</i>    | kinesin family member 14                                            | ENSG00000118193 | 1  | Rare Single Gene Mutation, Syndromic                      |
| <i>KIF5C</i>    | Kinesin family member 5C                                            | ENSG00000168280 | 2  | Rare Single Gene Mutation, Syndromic                      |
| <i>KIRREL3</i>  | Kin of IRRE like 3 (Drosophila)                                     | ENSG00000149571 | 11 | Rare Single Gene Mutation                                 |
| <i>KLF16</i>    | Kruppel like factor 16                                              | ENSG00000129911 | 19 | Rare Single Gene Mutation                                 |

|                 |                                                                 |                 |    |                                                           |
|-----------------|-----------------------------------------------------------------|-----------------|----|-----------------------------------------------------------|
| <i>KMT2A</i>    | Lysine (K)-specific methyltransferase 2A                        | ENSG00000118058 | 11 | Rare Single Gene Mutation, Syndromic                      |
| <i>KMT2C</i>    | Lysine (K)-specific methyltransferase 2C                        | ENSG00000055609 | 7  | Rare Single Gene Mutation, Syndromic, Functional          |
| <i>KMT2E</i>    | Lysine (K)-specific methyltransferase 2E                        | ENSG00000005483 | 7  | Rare Single Gene Mutation, Syndromic, Genetic Association |
| <i>KMT5B</i>    | lysine methyltransferase 5B                                     | ENSG00000110066 | 11 | Rare Single Gene Mutation, Syndromic                      |
| <i>KIAA0232</i> | KIAA0232                                                        | ENSG00000170871 | 4  | Rare Single Gene Mutation                                 |
| <i>KNG1</i>     | kininogen 1                                                     | ENSG00000113889 | 3  | Rare Single Gene Mutation                                 |
| <i>KPTN</i>     | kaptin, actin binding protein                                   | ENSG00000118162 | 19 | Rare Single Gene Mutation, Syndromic                      |
| <i>KRR1</i>     | KRR1, small subunit (SSU) processome component, homolog (yeast) | ENSG00000111615 | 12 | Rare Single Gene Mutation, Genetic Association            |
| <i>KRT26</i>    | keratin 26                                                      | ENSG00000186393 | 17 | Rare Single Gene Mutation                                 |
| <i>LAMA1</i>    | Laminin, alpha 1                                                | ENSG00000101680 | 18 | Rare Single Gene Mutation, Genetic Association            |
| <i>LAMB1</i>    | laminin, beta 1                                                 | ENSG00000091136 | 7  | Rare Single Gene Mutation, Genetic Association            |
| <i>LAS1L</i>    | LAS1 like ribosome biogenesis factor                            | ENSG00000001497 | X  | Rare Single Gene Mutation, Syndromic                      |
| <i>LDB1</i>     | LIM domain binding 1                                            | ENSG00000198728 | 10 | Rare Single Gene Mutation                                 |
| <i>LDLR</i>     | low density lipoprotein receptor                                | ENSG00000130164 | 19 | Rare Single Gene Mutation                                 |
| <i>LEO1</i>     | LEO1 homolog, Paf1/RNA polymerase II complex component          | ENSG00000166477 | 15 | Rare Single Gene Mutation                                 |
| <i>LEP</i>      | Leptin leukocyte                                                | ENSG00000174697 | 7  | Rare Single Gene Mutation                                 |
| <i>LILRB2</i>   | immunoglobulin like receptor B2                                 | ENSG00000131042 | 19 | Rare Single Gene Mutation                                 |

|                |                                                                  |                 |    |                                                                       |
|----------------|------------------------------------------------------------------|-----------------|----|-----------------------------------------------------------------------|
| <i>LIN7B</i>   | lin-7 homolog B, crumbs cell polarity complex component          | ENSG00000104863 | 19 | Rare Single Gene Mutation                                             |
| <i>LRBA</i>    | LPS-responsive vesicle trafficking, beach and anchor containing  | ENSG00000198589 | 4  | Rare Single Gene Mutation                                             |
| <i>LRFN2</i>   | leucine rich repeat and fibronectin type III domain containing 2 | ENSG00000156564 | 6  | Rare Single Gene Mutation, Genetic Association, Functional            |
| <i>LRFN5</i>   | leucine rich repeat and fibronectin type III domain containing 5 | ENSG00000165379 | 14 | Rare Single Gene Mutation, Genetic Association                        |
| <i>LRP1</i>    | LDL receptor related protein 1                                   | ENSG00000123384 | 12 | Rare Single Gene Mutation                                             |
| <i>LRP2</i>    | LDL receptor related protein 2                                   | ENSG00000081479 | 2  | Rare Single Gene Mutation, Syndromic, Genetic Association             |
| <i>LRRC1</i>   | leucine rich repeat containing 1                                 | ENSG00000137269 | 6  | Rare Single Gene Mutation, Genetic Association                        |
| <i>LRRC4</i>   | leucine rich repeat containing 4                                 | ENSG00000128594 | 7  | Rare Single Gene Mutation, Functional                                 |
| <i>LZTR1</i>   | Leucine-zipper-like transcription regulator 1                    | ENSG00000099949 | 22 | Rare Single Gene Mutation, Syndromic                                  |
| <i>MACROD2</i> | MACRO domain containing 2                                        | ENSG00000172264 | 20 | Rare Single Gene Mutation, Genetic Association                        |
| <i>MAGEL2</i>  | MAGE-like 2                                                      | ENSG00000254585 | 15 | Rare Single Gene Mutation, Syndromic                                  |
| <i>MAOA</i>    | monoamine oxidase A                                              | ENSG00000189221 | X  | Rare Single Gene Mutation, Syndromic, Genetic Association, Functional |
| <i>MAOB</i>    | monoamine oxidase B                                              | ENSG00000069535 | X  | Rare Single Gene Mutation, Genetic Association, Functional            |
| <i>MAPK3</i>   | mitogen-activated protein kinase 3                               | ENSG00000102882 | 16 | Rare Single Gene Mutation, Functional                                 |
| <i>MARK1</i>   | microtubule affinity regulating kinase 1                         | ENSG00000116141 | 1  | Rare Single Gene Mutation, Genetic Association                        |

|               |                                                             |                 |    |                                                  |
|---------------|-------------------------------------------------------------|-----------------|----|--------------------------------------------------|
| <i>MBD1</i>   | methyl-CpG binding domain protein 1                         | ENSG00000141644 | 18 | Rare Single Gene Mutation                        |
| <i>MBD3</i>   | methyl-CpG binding domain protein 3                         | ENSG00000071655 | 19 | Rare Single Gene Mutation                        |
| <i>MBD4</i>   | methyl-CpG binding domain protein 4                         | ENSG00000129071 | 3  | Rare Single Gene Mutation                        |
| <i>MBD5</i>   | Methyl-CpG binding domain protein 5                         | ENSG00000204406 | 2  | Rare Single Gene Mutation, Syndromic, Functional |
| <i>MBD6</i>   | Methyl-CpG binding domain protein 6                         | ENSG00000166987 | 12 | Rare Single Gene Mutation                        |
| <i>MBOAT7</i> | membrane bound O-acyltransferase domain containing 7        | ENSG00000125505 | 19 | Rare Single Gene Mutation, Syndromic             |
| <i>MCM4</i>   | minichromosome maintenance complex component 4              | ENSG00000104738 | 8  | Rare Single Gene Mutation                        |
| <i>MCM6</i>   | minichromosome maintenance complex component 6              | ENSG00000076003 | 2  | Rare Single Gene Mutation                        |
| <i>MCPH1</i>  | microcephalin 1                                             | ENSG00000147316 | 8  | Rare Single Gene Mutation                        |
| <i>MDGA2</i>  | MAM domain containing glycosylphosphatidylinositol anchor 2 | ENSG00000139915 | 14 | Rare Single Gene Mutation, Genetic Association   |
| <i>MECP2</i>  | Methyl CpG binding protein 2                                | ENSG00000169057 | X  | Rare Single Gene Mutation, Syndromic, Functional |
| <i>LRRC4C</i> | leucine rich repeat containing 4C                           | ENSG00000148948 | 11 | Rare Single Gene Mutation                        |
| <i>MAP1A</i>  | microtubule associated protein 1A                           | ENSG00000166963 | 15 | Rare Single Gene Mutation                        |
| <i>MED12L</i> | mediator complex subunit 12L                                | ENSG00000144893 | 3  | Rare Single Gene Mutation, Syndromic             |
| <i>MED13</i>  | mediator complex subunit 13                                 | ENSG00000108510 | 17 | Rare Single Gene Mutation, Syndromic             |

|                |                                                |                 |    |                                                                       |
|----------------|------------------------------------------------|-----------------|----|-----------------------------------------------------------------------|
| <i>MED13L</i>  | Mediator complex subunit 13-like               | ENSG00000123066 | 12 | Rare Single Gene Mutation, Syndromic                                  |
| <i>MEF2C</i>   | myocyte enhancer factor 2C                     | ENSG00000081189 | 5  | Rare Single Gene Mutation, Syndromic, Genetic Association, Functional |
| <i>MEGF10</i>  | multiple EGF like domains 10                   | ENSG00000145794 | 5  | Rare Single Gene Mutation, Genetic Association                        |
| <i>MEGF11</i>  | multiple EGF like domains 11                   | ENSG00000157890 | 15 | Rare Single Gene Mutation                                             |
| <i>MEIS2</i>   | Meis homeobox 2                                | ENSG00000134138 | 15 | Rare Single Gene Mutation, Syndromic                                  |
| <i>MEMO1</i>   | mediator of cell motility 1 met proto-oncogene | ENSG00000162959 | 2  | Rare Single Gene Mutation, Functional                                 |
| <i>MET</i>     | (hepatocyte growth factor receptor)            | ENSG00000105976 | 7  | Rare Single Gene Mutation, Genetic Association, Functional            |
| <i>MFRP</i>    | Membrane frizzled-related protein              | ENSG00000235718 | 11 | Rare Single Gene Mutation                                             |
| <i>MIB1</i>    | Mindbomb E3 ubiquitin protein ligase 1         | ENSG00000101752 | 18 | Rare Single Gene Mutation                                             |
| <i>MLANA</i>   | melan-A                                        | ENSG00000120215 | 9  | Rare Single Gene Mutation                                             |
| <i>MPP6</i>    | membrane palmitoylated protein 6               | ENSG00000105926 | 7  | Rare Single Gene Mutation                                             |
| <i>MSANTD2</i> | Myb/SANT DNA binding domain containing 2       | ENSG00000120458 | 11 | Rare Single Gene Mutation                                             |
| <i>METTL26</i> | methyltransferase like 26                      | ENSG00000130731 | 16 | Rare Single Gene Mutation                                             |
| <i>MIR137</i>  | microRNA 137                                   | ENSG00000284202 | 1  | Rare Single Gene Mutation, Syndromic, Genetic Association, Functional |
| <i>MRTFB</i>   | myocardin related transcription factor B       | ENSG00000186260 | 16 | Rare Single Gene Mutation, Genetic Association                        |
| <i>MSR1</i>    | macrophage scavenger receptor 1                | ENSG00000038945 | 8  | Rare Single Gene Mutation                                             |
| <i>MTHFR</i>   | methylenetetrahydrofolate reductase (NAD(P)H)  | ENSG00000177000 | 1  | Rare Single Gene Mutation, Syndromic, Genetic Association             |

|                 |                                                           |                 |    |                                                           |
|-----------------|-----------------------------------------------------------|-----------------|----|-----------------------------------------------------------|
| <i>MTOR</i>     | Mechanistic target of rapamycin (serine/threonine kinase) | ENSG00000198793 | 1  | Rare Single Gene Mutation, Syndromic, Functional          |
| <i>MUC12</i>    | mucin 12, cell surface associated                         | ENSG00000205277 | 7  | Rare Single Gene Mutation                                 |
| <i>MUC4</i>     | mucin 4, cell surface associated                          | ENSG00000145113 | 3  | Rare Single Gene Mutation                                 |
| <i>MYH10</i>    | myosin heavy chain 10                                     | ENSG00000133026 | 17 | Rare Single Gene Mutation                                 |
| <i>MYH4</i>     | Myosin, heavy chain 4, skeletal muscle                    | ENSG00000264424 | 17 | Rare Single Gene Mutation                                 |
| <i>MYO16</i>    | myosin XVI                                                | ENSG00000041515 | 13 | Rare Single Gene Mutation, Genetic Association            |
| <i>MYO1E</i>    | myosin IE                                                 | ENSG00000157483 | 15 | Rare Single Gene Mutation                                 |
| <i>MYO5A</i>    | myosin VA                                                 | ENSG00000197535 | 15 | Rare Single Gene Mutation, Genetic Association            |
| <i>MYO5C</i>    | myosin VC                                                 | ENSG00000128833 | 15 | Rare Single Gene Mutation                                 |
| <i>MYO9B</i>    | Myosin IXB                                                | ENSG00000099331 | 19 | Rare Single Gene Mutation                                 |
| <i>MYT1L</i>    | Myelin transcription factor 1-like N(alpha)-              | ENSG00000186487 | 2  | Rare Single Gene Mutation, Syndromic, Genetic Association |
| <i>NAA15</i>    | acetyltransferase 15, NatA auxiliary subunit              | ENSG00000164134 | 4  | Rare Single Gene Mutation, Syndromic                      |
| <i>MKX</i>      | mohawk homeobox                                           | ENSG00000150051 | 10 | Rare Single Gene Mutation                                 |
| <i>MSX2</i>     | msh homeobox 2                                            | ENSG00000120149 | 5  | Rare Single Gene Mutation, Syndromic                      |
| <i>MYLK</i>     | myosin light chain kinase                                 | ENSG00000065534 | 3  | Rare Single Gene Mutation                                 |
| <i>MYOCD</i>    | myocardin                                                 | ENSG00000141052 | 17 | Rare Single Gene Mutation                                 |
| <i>NAALADL2</i> | N-acetylated alpha-linked acidic dipeptidase-like 2       | ENSG00000177694 | 3  | Rare Single Gene Mutation, Genetic Association            |
| <i>NACCI1</i>   | nucleus accumbens associated 1                            | ENSG00000160877 | 19 | Rare Single Gene Mutation, Syndromic                      |
| <i>NAV2</i>     | neuron navigator 2                                        | ENSG00000166833 | 11 | Rare Single Gene Mutation                                 |
| <i>NBEA</i>     | neurobeachin                                              | ENSG00000172915 | 13 | Rare Single Gene Mutation, Syndromic, Functional          |
| <i>NCKAP1</i>   | NCK-associated protein 1                                  | ENSG00000061676 | 2  | Rare Single Gene Mutation                                 |
| <i>NCKAP5</i>   | NCK-associated protein 5                                  | ENSG00000176771 | 2  | Rare Single Gene Mutation                                 |

|               |                                                                 |                 |    |                                                            |
|---------------|-----------------------------------------------------------------|-----------------|----|------------------------------------------------------------|
| <i>NCOR1</i>  | nuclear receptor corepressor 1                                  | ENSG00000141027 | 17 | Rare Single Gene Mutation, Functional                      |
| <i>NEGR1</i>  | neuronal growth regulator 1                                     | ENSG00000172260 | 1  | Rare Single Gene Mutation, Genetic Association, Functional |
| <i>NEO1</i>   | Neogenin 1 neurofibromin 1                                      | ENSG00000067141 | 15 |                                                            |
| <i>NF1</i>    | (neurofibromatosis, von Recklinghausen disease, Watson disease) | ENSG00000196712 | 17 | Rare Single Gene Mutation, Syndromic, Genetic Association  |
| <i>NFE2L3</i> | nuclear factor, erythroid 2 like 3                              | ENSG00000050344 | 7  | Rare Single Gene Mutation                                  |
| <i>NFIA</i>   | nuclear factor I/A                                              | ENSG00000162599 | 1  | Rare Single Gene Mutation                                  |
| <i>NFIB</i>   | nuclear factor I B                                              | ENSG00000147862 | 9  | Rare Single Gene Mutation, Syndromic                       |
| <i>NFIX</i>   | nuclear factor I/X (CCAAT-binding transcription factor)         | ENSG00000008441 | 19 | Rare Single Gene Mutation, Syndromic                       |
| <i>NINL</i>   | Ninein-like non imprinted in Prader-Willi/Angelman syndrome 1   | ENSG00000101004 | 20 | Rare Single Gene Mutation                                  |
| <i>NIPA1</i>  | non imprinted in Prader-Willi/Angelman syndrome 1               | ENSG00000170113 | 15 | Rare Single Gene Mutation                                  |
| <i>NIPA2</i>  | non imprinted in Prader-Willi/Angelman syndrome 2               | ENSG00000140157 | 15 | Rare Single Gene Mutation                                  |
| <i>NIPBL</i>  | Nipped-B homolog (Drosophila)                                   | ENSG00000164190 | 5  | Rare Single Gene Mutation, Syndromic                       |
| <i>NEXMIF</i> | neurite extension and migration factor                          | ENSG00000050030 | X  | Rare Single Gene Mutation, Syndromic, Functional           |
| <i>NLGN1</i>  | neuroligin 1                                                    | ENSG00000169760 | 3  | Rare Single Gene Mutation, Genetic Association             |
| <i>NLGN2</i>  | Neuroligin 2                                                    | ENSG00000169992 | 17 | Rare Single Gene Mutation, Functional                      |
| <i>NLGN3</i>  | neuroligin 3                                                    | ENSG00000196338 | X  | Rare Single Gene Mutation                                  |
| <i>NLGN4X</i> | neuroligin 4, X-linked                                          | ENSG00000146938 | X  | Rare Single Gene Mutation, Genetic Association             |
| <i>NLGN4Y</i> | neuroligin 4, Y-linked                                          | ENSG00000165246 | Y  | Rare Single Gene Mutation, Genetic Association, Functional |

|               |                                                       |                 |    |                                                                          |
|---------------|-------------------------------------------------------|-----------------|----|--------------------------------------------------------------------------|
| <i>NR1D1</i>  | nuclear receptor<br>subfamily 1 group D<br>member 1   | ENSG00000126368 | 17 | Rare Single Gene Mutation                                                |
| <i>NR2F1</i>  | nuclear receptor<br>subfamily 2 group F<br>member 1   | ENSG00000175745 | 5  | Rare Single Gene Mutation, Syndromic, Functional                         |
| <i>NR3C2</i>  | Nuclear receptor<br>subfamily 3, group C,<br>member 2 | ENSG00000151623 | 4  | Rare Single Gene Mutation, Syndromic                                     |
| <i>NR4A2</i>  | nuclear receptor<br>subfamily 4 group A<br>member 2   | ENSG00000153234 | 2  | Rare Single Gene Mutation, Syndromic                                     |
| <i>NRCAM</i>  | neuronal cell adhesion<br>molecule                    | ENSG00000091129 | 7  | Rare Single Gene Mutation, Genetic Association                           |
| <i>NRP2</i>   | neuropilin 2                                          | ENSG00000118257 | 2  | Rare Single Gene Mutation, Genetic Association                           |
| <i>NRXN1</i>  | neurexin 1                                            | ENSG00000179915 | 2  | Rare Single Gene Mutation, Syndromic, Genetic Association,<br>Functional |
| <i>NCAPH2</i> | non-SMC condensin II<br>complex subunit H2            | ENSG00000025770 | 22 | Rare Single Gene Mutation                                                |
| <i>NCOA1</i>  | nuclear receptor<br>coactivator 1                     | ENSG00000084676 | 2  | Rare Single Gene Mutation                                                |
| <i>NRXN2</i>  | neurexin 2                                            | ENSG00000110076 | 11 | Rare Single Gene Mutation, Genetic Association                           |
| <i>NRXN3</i>  | neurexin 3                                            | ENSG00000021645 | 14 | Rare Single Gene Mutation, Genetic Association                           |
| <i>NSD1</i>   | nuclear receptor binding<br>SET domain protein 1      | ENSG00000165671 | 5  | Rare Single Gene Mutation, Syndromic                                     |
| <i>NTNG1</i>  | netrin G1                                             | ENSG00000162631 | 1  | Rare Single Gene Mutation, Syndromic, Genetic Association                |
| <i>NTRK1</i>  | neurotrophic tyrosine<br>kinase, receptor, type 1     | ENSG00000198400 | 1  | Rare Single Gene Mutation, Syndromic                                     |
| <i>NTRK3</i>  | neurotrophic tyrosine<br>kinase, receptor, type 3     | ENSG00000140538 | 15 | Rare Single Gene Mutation, Syndromic, Genetic Association                |
| <i>NUAK1</i>  | NUAK family, SNF1-like<br>kinase, 1                   | ENSG00000074590 | 12 | Rare Single Gene Mutation, Functional                                    |



|               |                                                      |                 |    |                                                            |
|---------------|------------------------------------------------------|-----------------|----|------------------------------------------------------------|
| <i>NUDCD2</i> | NudC domain containing 2                             | ENSG00000170584 | 5  | Rare Single Gene Mutation                                  |
| <i>NUP133</i> | nucleoporin 133kDa                                   | ENSG00000069248 | 1  | Rare Single Gene Mutation                                  |
| <i>NXPH1</i>  | neurexophilin 1                                      | ENSG00000122584 | 7  | Rare Single Gene Mutation                                  |
| <i>OCRL</i>   | oculocerebrorenal syndrome of Lowe                   | ENSG00000122126 | X  | Rare Single Gene Mutation, Syndromic                       |
| <i>ODF3L2</i> | outer dense fiber of sperm tails 3-like 2            | ENSG00000181781 | 19 | Rare Single Gene Mutation                                  |
| <i>OFD1</i>   | OFD1, centriole and centriolar satellite protein     | ENSG00000046651 | X  | Rare Single Gene Mutation                                  |
| <i>OPHN1</i>  | oligophrenin 1                                       | ENSG00000079482 | X  | Rare Single Gene Mutation, Syndromic                       |
| <i>OR1C1</i>  | olfactory receptor, family 1, subfamily C, member 1  | ENSG00000221888 | 1  | Rare Single Gene Mutation                                  |
| <i>OR2T10</i> | olfactory receptor family 2 subfamily T member 10    | ENSG00000184022 | 1  | Rare Single Gene Mutation                                  |
| <i>OR52M1</i> | Olfactory receptor, family 52, subfamily M, member 1 | ENSG00000197790 | 11 | Rare Single Gene Mutation                                  |
| <i>OTUD7A</i> | OTU deubiquitinase 7A                                | ENSG00000169918 | 15 | Rare Single Gene Mutation, Functional                      |
| <i>NUP155</i> | nucleoporin 155                                      | ENSG00000113569 | 5  | Rare Single Gene Mutation                                  |
| <i>NXF1</i>   | nuclear RNA export factor 1                          | ENSG00000162231 | 11 | Rare Single Gene Mutation                                  |
| <i>OXT</i>    | oxytocin/neurophysin I prepropeptide                 | ENSG00000101405 | 20 | Rare Single Gene Mutation, Genetic Association             |
| <i>OXTR</i>   | oxytocin receptor                                    | ENSG00000180914 | 3  | Rare Single Gene Mutation, Genetic Association, Functional |
| <i>P2RX5</i>  | Purinergic receptor P2X, ligand gated ion channel, 5 | ENSG00000083454 | 17 | Rare Single Gene Mutation                                  |
| <i>P4HA2</i>  | Prolyl 4-hydroxylase, alpha polypeptide II           | ENSG00000072682 | 5  | Rare Single Gene Mutation                                  |
| <i>PACS1</i>  | phosphofurin acidic cluster sorting protein 1        | ENSG00000175115 | 11 | Rare Single Gene Mutation, Syndromic                       |

|                 |                                                                   |                 |    |                                                           |
|-----------------|-------------------------------------------------------------------|-----------------|----|-----------------------------------------------------------|
| <i>PACS2</i>    | phosphofurin acidic cluster sorting protein 2                     | ENSG00000179364 | 14 | Rare Single Gene Mutation, Syndromic                      |
| <i>PAFAH1B2</i> | platelet activating factor acetylhydrolase 1b catalytic subunit 2 | ENSG00000168092 | 11 | Rare Single Gene Mutation                                 |
| <i>PAH</i>      | Phenylalanine hydroxylase                                         | ENSG00000171759 | 12 | Rare Single Gene Mutation, Syndromic                      |
| <i>PAK1</i>     | p21 (RAC1) activated kinase 1                                     | ENSG00000149269 | 11 | Rare Single Gene Mutation, Syndromic                      |
| <i>PAK2</i>     | p21 (RAC1) activated kinase 2                                     | ENSG00000180370 | 3  | Rare Single Gene Mutation                                 |
| <i>PAPOLG</i>   | poly(A) polymerase gamma                                          | ENSG00000115421 | 2  | Rare Single Gene Mutation                                 |
| <i>PARD3B</i>   | Par-3 partitioning defective 3 homolog B (C. elegans)             | ENSG00000116117 | 2  | Rare Single Gene Mutation, Genetic Association            |
| <i>PATJ</i>     | PATJ, crumbs cell polarity complex component                      | ENSG00000132849 | 1  | Rare Single Gene Mutation, Genetic Association            |
| <i>PAX5</i>     | Paired box 5                                                      | ENSG00000196092 | 9  | Rare Single Gene Mutation                                 |
| <i>PAX6</i>     | Paired box 6                                                      | ENSG00000007372 | 11 | Rare Single Gene Mutation, Syndromic, Functional          |
| <i>PBX1</i>     | PBX homeobox 1                                                    | ENSG00000185630 | 1  | Rare Single Gene Mutation                                 |
| <i>PCCA</i>     | propionyl-CoA carboxylase alpha subunit                           | ENSG00000175198 | 13 | Rare Single Gene Mutation, Syndromic                      |
| <i>PCCB</i>     | propionyl-CoA carboxylase beta subunit                            | ENSG00000114054 | 3  | Rare Single Gene Mutation, Syndromic                      |
| <i>PCDH10</i>   | protocadherin 10                                                  | ENSG00000138650 | 4  | Rare Single Gene Mutation                                 |
| <i>PCDH11X</i>  | protocadherin 11 X-                                               | ENSG00000102290 | X  | Rare Single Gene Mutation                                 |
| <i>PCDH15</i>   | protocadherin related 15                                          | ENSG00000150275 | 10 | Rare Single Gene Mutation, Syndromic, Genetic Association |
| <i>PCDH19</i>   | protocadherin 19                                                  | ENSG00000165194 | X  | Rare Single Gene Mutation, Syndromic, Functional          |
| <i>PCDH9</i>    | protocadherin 9                                                   | ENSG00000184226 | 13 | Rare Single Gene Mutation, Genetic Association            |
| <i>PCDHA1</i>   | Protocadherin alpha 1                                             | ENSG00000204970 | 5  | Rare Single Gene Mutation, Genetic Association            |
| <i>PCDHA10</i>  | Protocadherin alpha 10                                            | ENSG00000250120 | 5  | Rare Single Gene Mutation, Genetic Association            |

|                |                                            |                 |    |                                                |
|----------------|--------------------------------------------|-----------------|----|------------------------------------------------|
| <i>PCDHA11</i> | Protocadherin alpha 11                     | ENSG00000249158 | 5  | Rare Single Gene Mutation, Genetic Association |
| <i>PCDHA12</i> | Protocadherin alpha 12                     | ENSG00000251664 | 5  | Rare Single Gene Mutation, Genetic Association |
| <i>PCDHA13</i> | Protocadherin alpha 13                     | ENSG00000239389 | 5  | Rare Single Gene Mutation, Genetic Association |
| <i>PCDHA2</i>  | Protocadherin alpha 2                      | ENSG00000204969 | 5  | Rare Single Gene Mutation, Genetic Association |
| <i>PCDHA3</i>  | Protocadherin alpha 3                      | ENSG00000255408 | 5  | Rare Single Gene Mutation, Genetic Association |
| <i>PCDHA4</i>  | Protocadherin alpha 4                      | ENSG00000204967 | 5  | Rare Single Gene Mutation, Genetic Association |
| <i>PCDHA5</i>  | Protocadherin alpha 5                      | ENSG00000204965 | 5  | Rare Single Gene Mutation, Genetic Association |
| <i>PCDHA6</i>  | Protocadherin alpha 6                      | ENSG00000081842 | 5  | Rare Single Gene Mutation, Genetic Association |
| <i>PCDHA7</i>  | Protocadherin alpha 7                      | ENSG00000204963 | 5  | Rare Single Gene Mutation, Genetic Association |
| <i>PCDHA8</i>  | Protocadherin alpha 8                      | ENSG00000204962 | 5  | Rare Single Gene Mutation, Genetic Association |
| <i>PCDHA9</i>  | Protocadherin alpha 9                      | ENSG00000204961 | 5  | Rare Single Gene Mutation, Genetic Association |
| <i>PCDHAC1</i> | Protocadherin alpha subfamily C, 1         | ENSG00000248383 | 5  | Rare Single Gene Mutation, Genetic Association |
| <i>PCMI</i>    | pericentriolar material 1                  | ENSG00000078674 | 8  | Rare Single Gene Mutation                      |
| <i>PDCD1</i>   | programmed cell death 1                    | ENSG00000188389 | 2  | Rare Single Gene Mutation                      |
| <i>PDE1C</i>   | phosphodiesterase 1C                       | ENSG00000154678 | 7  | Rare Single Gene Mutation, Genetic Association |
| <i>PDK2</i>    | pyruvate dehydrogenase kinase 2            | ENSG00000005882 | 17 | Rare Single Gene Mutation                      |
| <i>PER1</i>    | period homolog 1 (Drosophila)              | ENSG00000179094 | 17 | Rare Single Gene Mutation, Genetic Association |
| <i>PER2</i>    | period circadian clock 2                   | ENSG00000132326 | 2  | Rare Single Gene Mutation                      |
| <i>PEX7</i>    | peroxisomal biogenesis factor 7            | ENSG00000112357 | 6  | Rare Single Gene Mutation, Genetic Association |
| <i>PHF2</i>    | PHD finger protein 2                       | ENSG00000197724 | 9  | Rare Single Gene Mutation                      |
| <i>PHF21A</i>  | PHD finger protein 21A                     | ENSG00000135365 | 11 | Rare Single Gene Mutation, Syndromic           |
| <i>PHF3</i>    | PHD finger protein 3                       | ENSG00000118482 | 6  | Rare Single Gene Mutation                      |
| <i>PHF8</i>    | PHD finger protein 8                       | ENSG00000172943 | X  | Rare Single Gene Mutation, Syndromic           |
| <i>PHIP</i>    | pleckstrin homology domain interacting     | ENSG00000146247 | 6  | Rare Single Gene Mutation, Syndromic           |
| <i>PEBP4</i>   | phosphatidylethanolamine binding protein 4 | ENSG00000134020 | 8  | Rare Single Gene Mutation                      |
| <i>PHF12</i>   | PHD finger protein 12                      | ENSG00000109118 | 17 | Rare Single Gene Mutation                      |

|                |                                                                        |                 |    |                                                  |
|----------------|------------------------------------------------------------------------|-----------------|----|--------------------------------------------------|
| <i>PHRF1</i>   | PHD and ring finger domains 1                                          | ENSG00000070047 | 11 | Rare Single Gene Mutation                        |
| <i>PIK3R2</i>  | phosphoinositide-3-kinase regulatory subunit                           | ENSG00000105647 | 19 | Rare Single Gene Mutation, Syndromic             |
| <i>PITX1</i>   | paired-like homeodomain 1                                              | ENSG00000069011 | 5  | Rare Single Gene Mutation, Genetic Association   |
| <i>PLAUR</i>   | Plasminogen activator, urokinase receptor                              | ENSG00000011422 | 19 | Rare Single Gene Mutation, Genetic Association   |
| <i>PLCB1</i>   | phospholipase C, beta 1 (phosphoinositide-specific)                    | ENSG00000182621 | 20 | Rare Single Gene Mutation                        |
| <i>PLCD4</i>   | phospholipase C delta 4                                                | ENSG00000115556 | 2  | Rare Single Gene Mutation                        |
| <i>PLN</i>     | phospholamban                                                          | ENSG00000198523 | 6  | Rare Single Gene Mutation                        |
| <i>PLXNA3</i>  | plexin A3                                                              | ENSG00000130827 | X  | Rare Single Gene Mutation                        |
| <i>PLXNA4</i>  | Plexin A4                                                              | ENSG00000221866 | 7  | Rare Single Gene Mutation, Functional            |
| <i>PLXNB1</i>  | plexin B1                                                              | ENSG00000164050 | 3  | Rare Single Gene Mutation                        |
| <i>PNPLA7</i>  | patatin like phospholipase domain containing 7                         | ENSG00000130653 | 9  | Rare Single Gene Mutation                        |
| <i>POGZ</i>    | Pogo transposable element with ZNF                                     | ENSG00000143442 | 1  | Rare Single Gene Mutation, Syndromic, Functional |
| <i>POLA2</i>   | DNA polymerase alpha 2, accessory subunit                              | ENSG00000014138 | 11 | Rare Single Gene Mutation                        |
| <i>POMGNT1</i> | protein O-linked mannose N-acetylglucosaminyltransferase 1 (beta 1,2-) | ENSG00000085998 | 1  | Rare Single Gene Mutation, Syndromic             |
| <i>POMT1</i>   | protein O-mannosyltransferase 1                                        | ENSG00000130714 | 9  | Rare Single Gene Mutation                        |
| <i>POT1</i>    | Protection of telomeres 1 homolog ( <i>S. pombe</i> )                  | ENSG00000128513 | 7  | Rare Single Gene Mutation                        |
| <i>PPFIA1</i>  | PTPRF interacting protein alpha 1                                      | ENSG00000131626 | 11 | Rare Single Gene Mutation                        |

|                 |                                                                                     |                 |    |                                                  |
|-----------------|-------------------------------------------------------------------------------------|-----------------|----|--------------------------------------------------|
| <i>PPM1D</i>    | protein phosphatase,<br>Mg <sup>2+</sup> /Mn <sup>2+</sup> dependent<br>1D          | ENSG00000170836 | 17 | Rare Single Gene Mutation, Syndromic             |
| <i>PPP2R1B</i>  | protein phosphatase 2<br>regulatory subunit A, beta                                 | ENSG00000137713 | 11 | Rare Single Gene Mutation                        |
| <i>PPP2R5D</i>  | Protein phosphatase 2,<br>regulatory subunit B',<br>delta                           | ENSG00000112640 | 6  | Rare Single Gene Mutation, Syndromic             |
| <i>PREX1</i>    | Phosphatidylinositol-<br>3,4,5-trisphosphate-<br>dependent Rac exchange<br>factor 1 | ENSG00000124126 | 20 | Rare Single Gene Mutation, Genetic Association   |
| <i>PRICKLE1</i> | Prickle homolog 1<br>(Drosophila)                                                   | ENSG00000139174 | 12 | Rare Single Gene Mutation, Syndromic, Functional |
| <i>PRICKLE2</i> | prickle planar cell<br>polarity protein 2                                           | ENSG00000163637 | 3  | Rare Single Gene Mutation, Functional            |
| <i>PRKAR1B</i>  | protein kinase cAMP-<br>dependent type I<br>regulatory subunit beta                 | ENSG00000188191 | 7  | Rare Single Gene Mutation                        |
| <i>PRKCA</i>    | protein kinase C alpha                                                              | ENSG00000154229 | 17 | Rare Single Gene Mutation                        |
| <i>PRKCB</i>    | protein kinase C beta                                                               | ENSG00000166501 | 16 | Rare Single Gene Mutation, Genetic Association   |
| <i>PRKD1</i>    | Protein kinase D1                                                                   | ENSG00000184304 | 14 | Rare Single Gene Mutation, Syndromic             |
| <i>PRKD2</i>    | protein kinase D2                                                                   | ENSG00000105287 | 19 | Rare Single Gene Mutation                        |
| <i>PRKDC</i>    | protein kinase, DNA-<br>activated, catalytic<br>polypeptide                         | ENSG00000253729 | 8  | Rare Single Gene Mutation, Syndromic, Functional |
| <i>PRKN</i>     | parkin RBR E3 ubiquitin<br>protein ligase                                           | ENSG00000185345 | 6  | Rare Single Gene Mutation, Genetic Association   |
| <i>PRPF39</i>   | pre-mRNA processing<br>factor 39                                                    | ENSG00000185246 | 14 | Rare Single Gene Mutation                        |
| <i>PRR12</i>    | proline rich 12                                                                     | ENSG00000126464 | 19 | Rare Single Gene Mutation, Syndromic             |
| <i>PRUNE2</i>   | prune homolog 2                                                                     | ENSG00000106772 | 9  | Rare Single Gene Mutation, Syndromic             |

|                  |                                                                         |                 |    |                                                            |
|------------------|-------------------------------------------------------------------------|-----------------|----|------------------------------------------------------------|
| <i>PSD3</i>      | pleckstrin and Sec7 domain containing 3                                 | ENSG00000156011 | 8  | Rare Single Gene Mutation, Genetic Association             |
| <i>PTBP2</i>     | polypyrimidine tract binding protein 2                                  | ENSG00000117569 | 1  | Rare Single Gene Mutation, Genetic Association             |
| <i>PTCHD1</i>    | patched domain containing 1                                             | ENSG00000165186 | X  | Rare Single Gene Mutation, Genetic Association             |
| <i>PTEN</i>      | phosphatase and tensin homolog (mutated in multiple advanced cancers 1) | ENSG00000171862 | 10 | Rare Single Gene Mutation, Syndromic, Functional           |
| <i>PTCHD1-AS</i> | PTCHD1 antisense RNA (head to head)                                     | ENSG00000233067 | X  | Rare Single Gene Mutation                                  |
| <i>POLR3A</i>    | RNA polymerase III subunit A                                            | ENSG00000148606 | 10 | Rare Single Gene Mutation, Syndromic                       |
| <i>PPP1R9B</i>   | protein phosphatase 1 regulatory subunit 9B                             | ENSG00000108819 | 17 | Rare Single Gene Mutation                                  |
| <i>PPP5C</i>     | protein phosphatase 5 catalytic subunit                                 | ENSG00000011485 | 19 | Rare Single Gene Mutation                                  |
| <i>PTGS2</i>     | prostaglandin-endoperoxide synthase 2                                   | ENSG00000073756 | 1  | Rare Single Gene Mutation, Genetic Association, Functional |
| <i>PTK7</i>      | Protein tyrosine kinase 7 (inactive)                                    | ENSG00000112655 | 6  | Rare Single Gene Mutation                                  |
| <i>PTPN11</i>    | protein tyrosine phosphatase, non-receptor type 11                      | ENSG00000179295 | 12 | Rare Single Gene Mutation, Syndromic                       |
| <i>PTPRB</i>     | protein tyrosine phosphatase, receptor type B                           | ENSG00000127329 | 12 | Rare Single Gene Mutation, Genetic Association             |
| <i>PTPRC</i>     | protein tyrosine phosphatase, receptor type, C                          | ENSG00000081237 | 1  | Rare Single Gene Mutation, Genetic Association             |

|                  |                                                                |                 |    |                                                  |
|------------------|----------------------------------------------------------------|-----------------|----|--------------------------------------------------|
| <i>PTPRT</i>     | protein tyrosine<br>phosphatase, receptor<br>type, T           | ENSG00000196090 | 20 | Rare Single Gene Mutation, Functional            |
| <i>PXDN</i>      | peroxidasin                                                    | ENSG00000130508 | 2  | Rare Single Gene Mutation                        |
| <i>PYHIN1</i>    | Pyrin and HIN domain<br>family, member 1                       | ENSG00000163564 | 1  | Rare Single Gene Mutation                        |
| <i>QRICH1</i>    | glutamine rich 1                                               | ENSG00000198218 | 3  | Rare Single Gene Mutation                        |
| <i>RAB11FIP5</i> | RAB11 family interacting<br>protein 5                          | ENSG00000135631 | 2  | Rare Single Gene Mutation                        |
| <i>RAB2A</i>     | RAB2A, member RAS<br>oncogene family                           | ENSG00000104388 | 8  | Rare Single Gene Mutation                        |
| <i>RAB39B</i>    | RAB39B, member RAS<br>oncogene family                          | ENSG00000155961 | X  | Rare Single Gene Mutation, Syndromic, Functional |
| <i>RAB43</i>     | RAB43, member RAS<br>oncogene family                           | ENSG00000172780 | 3  | Rare Single Gene Mutation                        |
| <i>RAD21L1</i>   | RAD21 cohesin complex<br>component like 1                      | ENSG00000244588 | 20 | Rare Single Gene Mutation                        |
| <i>RAI1</i>      | retinoic acid induced 1                                        | ENSG00000108557 | 17 | Rare Single Gene Mutation, Syndromic             |
| <i>RALGAPB</i>   | Ral GTPase activating<br>protein non-catalytic beta<br>subunit | ENSG00000170471 | 20 | Rare Single Gene Mutation                        |
| <i>RANBP17</i>   | RAN binding protein 17                                         | ENSG00000204764 | 5  | Rare Single Gene Mutation                        |
| <i>RAPGEF4</i>   | Rap guanine nucleotide<br>exchange factor (GEF) 4              | ENSG00000091428 | 2  | Rare Single Gene Mutation                        |
| <i>RASSF5</i>    | Ras association domain<br>family member 5                      | ENSG00000266094 | 1  | Rare Single Gene Mutation, Genetic Association   |
| <i>RBFOX1</i>    | RNA binding protein,<br>fox-1 homolog (C.                      | ENSG00000078328 | 16 | Rare Single Gene Mutation, Genetic Association   |
| <i>RBM27</i>     | RNA binding motif<br>protein 27                                | ENSG00000091009 | 5  | Rare Single Gene Mutation                        |
| <i>REEP3</i>     | receptor accessory<br>protein 3                                | ENSG00000165476 | 10 | Rare Single Gene Mutation                        |

|                |                                                   |                 |    |                                                                       |
|----------------|---------------------------------------------------|-----------------|----|-----------------------------------------------------------------------|
| <i>RELN</i>    | Reelin                                            | ENSG00000189056 | 7  | Rare Single Gene Mutation, Syndromic, Genetic Association, Functional |
| <i>RERE</i>    | Arginine-glutamic acid dipeptide (RE) repeats     | ENSG00000142599 | 1  | Rare Single Gene Mutation, Syndromic, Genetic Association             |
| <i>RFX3</i>    | regulatory factor X3                              | ENSG00000080298 | 9  | Rare Single Gene Mutation                                             |
| <i>RGS7</i>    | regulator of G-protein signaling 7                | ENSG00000182901 | 1  | Rare Single Gene Mutation                                             |
| <i>RIMS1</i>   | Regulating synaptic membrane exocytosis 1         | ENSG00000079841 | 6  | Rare Single Gene Mutation, Genetic Association                        |
| <i>RIMS3</i>   | regulating synaptic membrane exocytosis 3         | ENSG00000117016 | 1  | Rare Single Gene Mutation                                             |
| <i>RLIM</i>    | Ring finger protein, LIM domain interacting       | ENSG00000131263 | X  | Rare Single Gene Mutation, Syndromic                                  |
| <i>RNF135</i>  | Ring finger protein 135                           | ENSG00000181481 | 17 | Rare Single Gene Mutation, Syndromic, Genetic Association             |
| <i>RNF25</i>   | ring finger protein 25                            | ENSG00000163481 | 2  | Rare Single Gene Mutation                                             |
| <i>RNF38</i>   | ring finger protein 38                            | ENSG00000137075 | 9  | Rare Single Gene Mutation                                             |
| <i>ROBO2</i>   | roundabout guidance receptor 2                    | ENSG00000185008 | 3  | Rare Single Gene Mutation, Genetic Association, Functional            |
| <i>RORA</i>    | RAR-related orphan receptor A                     | ENSG00000069667 | 15 | Rare Single Gene Mutation, Syndromic, Genetic Association, Functional |
| <i>RORB</i>    | RAR related orphan receptor B                     | ENSG00000198963 | 9  | Rare Single Gene Mutation, Syndromic, Functional                      |
| <i>RPL10</i>   | ribosomal protein L10                             | ENSG00000147403 | X  | Rare Single Gene Mutation, Syndromic                                  |
| <i>RPS6KA2</i> | ribosomal protein S6 kinase, 90kDa, polypeptide 2 | ENSG00000071242 | 6  | Rare Single Gene Mutation                                             |
| <i>RPS6KA3</i> | Ribosomal protein S6 kinase, 90kDa, polypeptide 3 | ENSG00000177189 | X  | Rare Single Gene Mutation, Syndromic                                  |
| <i>SAE1</i>    | SUMO1 activating enzyme subunit 1                 | ENSG00000142230 | 19 | Rare Single Gene Mutation                                             |
| <i>SAMD11</i>  | sterile alpha motif domain containing 11          | ENSG00000187634 | 1  | Rare Single Gene Mutation                                             |



|                       |                                                                                    |                 |    |                                                           |
|-----------------------|------------------------------------------------------------------------------------|-----------------|----|-----------------------------------------------------------|
| <i>SASH1</i>          | SAM and SH3 domain containing 1                                                    | ENSG00000111961 | 6  | Rare Single Gene Mutation                                 |
| <i>SATB2</i>          | SATB homeobox 2                                                                    | ENSG00000119042 | 2  | Rare Single Gene Mutation, Syndromic, Genetic Association |
| <i>RP11-1407O15.2</i> |                                                                                    | ENSG00000182591 | 17 | Rare Single Gene Mutation                                 |
| <i>RIMS2</i>          | regulating synaptic membrane exocytosis 2                                          | ENSG00000176406 | 8  | Rare Single Gene Mutation, Syndromic, Genetic Association |
| <i>SATB1</i>          | SATB homeobox 1                                                                    | ENSG00000182568 | 3  | Rare Single Gene Mutation                                 |
| <i>SBF1</i>           | SET binding factor 1                                                               | ENSG00000100241 | 22 | Rare Single Gene Mutation                                 |
| <i>SCFD2</i>          | sec1 family domain containing 2                                                    | ENSG00000184178 | 4  | Rare Single Gene Mutation                                 |
| <i>SCN1A</i>          | sodium channel, voltage-gated, type I, alpha subunit                               | ENSG00000144285 | 2  | Rare Single Gene Mutation, Syndromic, Genetic Association |
| <i>SCN2A</i>          | sodium channel, voltage-gated, type II, alpha subunit                              | ENSG00000136531 | 2  | Rare Single Gene Mutation, Syndromic                      |
| <i>SCN4A</i>          | Sodium channel, voltage gated, type IV alpha subunit                               | ENSG00000007314 | 17 | Rare Single Gene Mutation                                 |
| <i>SCN8A</i>          | sodium channel, voltage gated, type VIII, alpha subunit                            | ENSG00000196876 | 12 | Rare Single Gene Mutation, Syndromic                      |
| <i>SCN9A</i>          | sodium voltage-gated channel alpha subunit 9                                       | ENSG00000169432 | 2  | Rare Single Gene Mutation                                 |
| <i>SCP2</i>           | sterol carrier protein 2                                                           | ENSG00000116171 | 1  | Rare Single Gene Mutation                                 |
| <i>SDC2</i>           | syndecan 2 (heparan sulfate proteoglycan 1, cell surface-associated, fibroglycan ) | ENSG00000169439 | 8  | Rare Single Gene Mutation, Genetic Association            |

|               |                                                                                                                                                               |                 |    |                                                                          |
|---------------|---------------------------------------------------------------------------------------------------------------------------------------------------------------|-----------------|----|--------------------------------------------------------------------------|
| <i>SEMA5A</i> | sema domain, seven<br>thrombospondin repeats<br>(type 1 and type 1-like),<br>transmembrane domain<br>(TM) and short<br>cytoplasmic domain,<br>(semaphorin) 5A | ENSG00000112902 | 5  | Rare Single Gene Mutation, Genetic Association, Functional               |
| <i>SET</i>    | SETnuclear proto-<br>oncogene                                                                                                                                 | ENSG00000152217 | 9  | Rare Single Gene Mutation                                                |
| <i>SETBP1</i> | SET binding protein 1                                                                                                                                         | ENSG00000152217 | 18 | Rare Single Gene Mutation, Syndromic                                     |
| <i>SETD1B</i> | SET domain containing<br>1B                                                                                                                                   | ENSG00000139718 | 12 | Rare Single Gene Mutation, Syndromic                                     |
| <i>SETD2</i>  | SET domain containing 2                                                                                                                                       | ENSG00000181555 | 3  | Rare Single Gene Mutation, Syndromic                                     |
| <i>SETD5</i>  | SET domain containing 5                                                                                                                                       | ENSG00000168137 | 3  | Rare Single Gene Mutation, Syndromic                                     |
| <i>SETDB1</i> | SET domain, bifurcated 1                                                                                                                                      | ENSG00000143379 | 1  | Rare Single Gene Mutation                                                |
| <i>SETDB2</i> | SET domain, bifurcated 2                                                                                                                                      | ENSG00000136169 | 13 | Rare Single Gene Mutation, Syndromic                                     |
| <i>SEZ6L2</i> | SEZ6L2 seizure related<br>homolog (mouse)-like 2                                                                                                              | ENSG00000174938 | 16 | Rare Single Gene Mutation, Genetic Association                           |
| <i>SF3B1</i>  | splicing factor 3b subunit<br>1                                                                                                                               | ENSG00000115524 | 2  | Rare Single Gene Mutation                                                |
| <i>SGSH</i>   | N-sulfoglucosamine<br>sulfohydrolase                                                                                                                          | ENSG00000181523 | 17 | Rare Single Gene Mutation, Syndromic                                     |
| <i>SGSM3</i>  | Small G protein signaling<br>modulator 3                                                                                                                      | ENSG00000100359 | 22 | Rare Single Gene Mutation                                                |
| <i>SH3RF3</i> | SH3 domain containing<br>ring finger 3                                                                                                                        | ENSG00000172985 | 2  | Rare Single Gene Mutation                                                |
| <i>SHANK1</i> | SH3 and multiple ankyrin<br>repeat domains 1                                                                                                                  | ENSG00000161681 | 19 | Rare Single Gene Mutation, Genetic Association                           |
| <i>SHANK2</i> | SH3 and multiple ankyrin<br>repeat domains 2                                                                                                                  | ENSG00000162105 | 11 | Rare Single Gene Mutation, Syndromic, Genetic Association,<br>Functional |
| <i>SHANK3</i> | SH3 and multiple ankyrin<br>repeat domains 3                                                                                                                  | ENSG00000251322 | 22 | Rare Single Gene Mutation, Syndromic, Genetic Association,<br>Functional |

|                 |                                                                                                                     |                 |     |                                                            |
|-----------------|---------------------------------------------------------------------------------------------------------------------|-----------------|-----|------------------------------------------------------------|
| <i>SETD1A</i>   | SET domain containing<br>1A, histone lysine<br>methyltransferase                                                    | ENSG00000099381 | 16  | Rare Single Gene Mutation, Syndromic                       |
| <i>SHOX</i>     | short stature homeobox                                                                                              | ENSG00000185960 | X,Y | Rare Single Gene Mutation                                  |
| <i>SIK1</i>     | Salt-inducible kinase 1                                                                                             | ENSG00000142178 | 21  | Rare Single Gene Mutation, Syndromic                       |
| <i>SIN3A</i>    | SIN3 transcription<br>regulator family member<br>A                                                                  | ENSG00000169375 | 15  | Rare Single Gene Mutation, Syndromic                       |
| <i>SLC12A5</i>  | Solute carrier family 12<br>(potassium/chloride<br>transporter), member 5                                           | ENSG00000124140 | 20  | Rare Single Gene Mutation                                  |
| <i>SLC1A1</i>   | solute carrier family 1<br>(neuronal/epithelial high<br>affinity glutamate<br>transporter, system Xag),<br>member 1 | ENSG00000106688 | 9   | Rare Single Gene Mutation, Genetic Association             |
| <i>SLC1A2</i>   | Solute carrier family 1<br>(glial high affinity<br>glutamate transporter),<br>member 2                              | ENSG00000110436 | 11  | Rare Single Gene Mutation, Genetic Association, Functional |
| <i>SLC22A9</i>  | solute carrier family 22<br>member 9                                                                                | ENSG00000149742 | 11  | Rare Single Gene Mutation                                  |
| <i>SLC24A2</i>  | solute carrier family 24<br>member 2                                                                                | ENSG00000155886 | 9   | Rare Single Gene Mutation                                  |
| <i>SLC25A12</i> | solute carrier family 25<br>(mitochondrial carrier,<br>Aralar), member 12                                           | ENSG00000115840 | 2   | Rare Single Gene Mutation, Genetic Association, Functional |
| <i>SLC25A39</i> | solute carrier family 25<br>member 39                                                                               | ENSG00000013306 | 17  | Rare Single Gene Mutation                                  |
| <i>SLC27A4</i>  | Solute carrier family 27<br>(fatty acid transporter),<br>member 4                                                   | ENSG00000167114 | 9   | Rare Single Gene Mutation                                  |

|                 |                                                                                            |                 |    |                                                            |
|-----------------|--------------------------------------------------------------------------------------------|-----------------|----|------------------------------------------------------------|
| <i>SLC29A4</i>  | solute carrier family 29 member 4                                                          | ENSG00000164638 | 7  | Rare Single Gene Mutation                                  |
| <i>SLC38A10</i> | solute carrier family 38, member 10                                                        | ENSG00000157637 | 17 | Rare Single Gene Mutation                                  |
| <i>SLC45A1</i>  | solute carrier family 45 member 1                                                          | ENSG00000162426 | 1  | Rare Single Gene Mutation, Syndromic                       |
| <i>SLC4A10</i>  | solute carrier family 4, sodium bicarbonate transporter-like, member 10                    | ENSG00000144290 | 2  | Rare Single Gene Mutation, Genetic Association             |
| <i>SLC6A1</i>   | Solute carrier family 6 (neurotransmitter transporter), member 1                           | ENSG00000157103 | 3  | Rare Single Gene Mutation, Syndromic, Genetic Association  |
| <i>SKI</i>      | SKI proto-oncogene                                                                         | ENSG00000157933 | 1  | Rare Single Gene Mutation                                  |
| <i>SLC6A3</i>   | Solute carrier family 6 (neurotransmitter transporter), member 3                           | ENSG00000142319 | 5  | Rare Single Gene Mutation, Genetic Association, Functional |
| <i>SLC6A4</i>   | solute carrier family 6 (neurotransmitter transporter, serotonin), member 4                | ENSG00000108576 | 17 | Rare Single Gene Mutation, Genetic Association             |
| <i>SLC6A8</i>   | solute carrier family 6 (neurotransmitter transporter, creatine), member 8                 | ENSG00000130821 | X  | Rare Single Gene Mutation, Syndromic                       |
| <i>SLC7A3</i>   | Solute carrier family 7 (cationic amino acid transporter, y <sup>+</sup> system), member 3 | ENSG00000165349 | X  | Rare Single Gene Mutation                                  |
| <i>SLC7A5</i>   | solute carrier family 7 member 5                                                           | ENSG00000103257 | 16 | Rare Single Gene Mutation, Functional                      |
| <i>SLC7A7</i>   | solute carrier family 7 member 7                                                           | ENSG00000155465 | 14 | Rare Single Gene Mutation                                  |

|                |                                                                                                   |                 |    |                                                            |
|----------------|---------------------------------------------------------------------------------------------------|-----------------|----|------------------------------------------------------------|
| <i>SLC9A6</i>  | solute carrier family 9 (sodium/hydrogen exchanger), member 6                                     | ENSG00000198689 | X  | Rare Single Gene Mutation, Syndromic, Functional           |
| <i>SLC9A9</i>  | solute carrier family 9 (sodium/hydrogen exchanger), member 9                                     | ENSG00000181804 | 3  | Rare Single Gene Mutation, Genetic Association, Functional |
| <i>SLCO1B3</i> | Solute carrier organic anion transporter family, member 1B3                                       | ENSG00000111700 | 12 | Rare Single Gene Mutation                                  |
| <i>SLITRK5</i> | SLIT and NTRK like family member 5                                                                | ENSG00000165300 | 13 | Rare Single Gene Mutation, Functional                      |
| <i>SMAD4</i>   | SMAD family member 4 SWI/SNF related, matrix associated, actin                                    | ENSG00000141646 | 18 | Rare Single Gene Mutation                                  |
| <i>SMARCA2</i> | dependent regulator of chromatin, subfamily a, member 2 SWI/SNF related, matrix associated, actin | ENSG00000080503 | 9  | Rare Single Gene Mutation, Syndromic, Genetic Association  |
| <i>SMARCA4</i> | dependent regulator of chromatin, subfamily a, member 4 SWI/SNF related, matrix associated, actin | ENSG00000127616 | 19 | Rare Single Gene Mutation, Syndromic                       |
| <i>SMARCC2</i> | dependent regulator of chromatin, subfamily c, member 2                                           | ENSG00000139613 | 12 | Rare Single Gene Mutation, Syndromic, Functional           |
| <i>SMC1A</i>   | structural maintenance of chromosomes 1A                                                          | ENSG00000072501 | X  | Rare Single Gene Mutation, Syndromic                       |
| <i>SMC3</i>    | structural maintenance of chromosomes 3                                                           | ENSG00000108055 | 10 | Rare Single Gene Mutation, Syndromic                       |

|                |                                                       |                 |    |                                                           |
|----------------|-------------------------------------------------------|-----------------|----|-----------------------------------------------------------|
| <i>SMG6</i>    | SMG6, nonsense mediated mRNA decay factor             | ENSG00000070366 | 17 | Rare Single Gene Mutation                                 |
| <i>SMURF1</i>  | SMAD specific E3 ubiquitin protein ligase 1           | ENSG00000198742 | 7  | Rare Single Gene Mutation                                 |
| <i>SNAP25</i>  | Synaptosomal-associated protein, 25kDa                | ENSG00000132639 | 20 | Rare Single Gene Mutation, Genetic Association            |
| <i>SND1</i>    | staphylococcal nuclease and tudor domain containing 1 | ENSG00000197157 | 7  | Rare Single Gene Mutation, Genetic Association            |
| <i>SNTG2</i>   | syntrophin gamma 2                                    | ENSG00000172554 | 2  | Rare Single Gene Mutation                                 |
| <i>SNX14</i>   | Sorting nexin 14                                      | ENSG00000135317 | 6  | Rare Single Gene Mutation, Syndromic                      |
| <i>SNX5</i>    | sorting nexin 5                                       | ENSG00000089006 | 20 | Rare Single Gene Mutation                                 |
| <i>SON</i>     | SONDNA binding                                        | ENSG00000115904 | 21 | Rare Single Gene Mutation, Syndromic, Functional          |
| <i>SOX5</i>    | SRY-box 5                                             | ENSG00000134532 | 12 | Rare Single Gene Mutation, Syndromic, Genetic Association |
| <i>SPARCL1</i> | SPARC like 1                                          | ENSG00000152583 | 4  | Rare Single Gene Mutation, Functional                     |
| <i>SPAST</i>   | Spastin                                               | ENSG00000021574 | 2  | Rare Single Gene Mutation                                 |
| <i>SPEN</i>    | spenfamily transcriptional repressor                  | ENSG00000065526 | 1  | Rare Single Gene Mutation                                 |
| <i>SPP2</i>    | secreted phosphoprotein                               | ENSG00000072080 | 2  | Rare Single Gene Mutation                                 |
| <i>SRCAP</i>   | Snf2 related CREBBP activator protein                 | ENSG00000080603 | 16 | Rare Single Gene Mutation                                 |
| <i>SRGAP3</i>  | SLIT-ROBO Rho GTPase activating protein 3             | ENSG00000196220 | 3  | Rare Single Gene Mutation                                 |
| <i>SRSF11</i>  | serine and arginine rich splicing factor 11           | ENSG00000116754 | 1  | Rare Single Gene Mutation                                 |
| <i>SSPO</i>    | SCO-spondin                                           | ENSG00000197558 | 7  | Rare Single Gene Mutation                                 |
| <i>SSRP1</i>   | structure specific recognition protein 1              | ENSG00000149136 | 11 | Rare Single Gene Mutation                                 |
| <i>ST7</i>     | suppression of tumorigenicity 7                       | ENSG00000004866 | 7  | Rare Single Gene Mutation                                 |

|                |                                                                                               |                 |    |                                                            |
|----------------|-----------------------------------------------------------------------------------------------|-----------------|----|------------------------------------------------------------|
| <i>ST8SIA2</i> | ST8 alpha-N-acetylneuraminide alpha-2,8-sialyltransferase 2                                   | ENSG00000140557 | 15 | Rare Single Gene Mutation, Genetic Association             |
| <i>STAG1</i>   | stromal antigen 1                                                                             | ENSG00000118007 | 3  | Rare Single Gene Mutation, Syndromic                       |
| <i>STX1A</i>   | Syntaxin 1A (brain)                                                                           | ENSG00000106089 | 7  | Rare Single Gene Mutation, Genetic Association             |
| <i>STXBP1</i>  | Syntaxin binding protein sortilin related VPS10 domain containing receptor 3                  | ENSG00000136854 | 9  | Rare Single Gene Mutation, Syndromic, Functional           |
| <i>SORCS3</i>  | Syntaxin binding protein 5 (tomosyn)                                                          | ENSG00000156395 | 10 | Rare Single Gene Mutation, Syndromic, Genetic Association  |
| <i>STXBP5</i>  | Serine/threonine/tyrosine kinase 1                                                            | ENSG00000164506 | 6  | Rare Single Gene Mutation                                  |
| <i>STYK1</i>   | Synapse associated protein 1                                                                  | ENSG00000060140 | 12 | Rare Single Gene Mutation, Genetic Association             |
| <i>SYAP1</i>   | Synapsin 1                                                                                    | ENSG00000169895 | X  | Rare Single Gene Mutation                                  |
| <i>SYN1</i>    | Synapsin II                                                                                   | ENSG00000008056 | X  | Rare Single Gene Mutation, Functional                      |
| <i>SYN2</i>    | synaptotagmin binding cytoplasmic RNA interacting protein spectrin repeat containing, nuclear | ENSG00000157152 | 3  | Rare Single Gene Mutation, Genetic Association, Functional |
| <i>SYNCRIP</i> | synaptic Ras GTPase activating protein 1                                                      | ENSG00000135316 | 6  | Rare Single Gene Mutation                                  |
| <i>SYNE1</i>   | SRP receptor subunit alpha                                                                    | ENSG00000131018 | 6  | Rare Single Gene Mutation, Genetic Association             |
| <i>SYNGAP1</i> | synaptojanin 1                                                                                | ENSG00000197283 | 6  | Rare Single Gene Mutation, Syndromic                       |
| <i>SRPRA</i>   | synaptotagmin 1                                                                               | ENSG00000182934 | 11 | Rare Single Gene Mutation                                  |
| <i>SYNJI</i>   | TATA-box binding protein associated factor 1                                                  | ENSG00000159082 | 21 | Rare Single Gene Mutation                                  |
| <i>SYTI</i>    |                                                                                               | ENSG00000067715 | 12 | Rare Single Gene Mutation, Syndromic                       |
| <i>TAF1</i>    |                                                                                               | ENSG00000147133 | X  | Rare Single Gene Mutation, Syndromic                       |

|                |                                                                        |                 |    |                                                                       |
|----------------|------------------------------------------------------------------------|-----------------|----|-----------------------------------------------------------------------|
| <i>TAF1C</i>   | TATA-box binding protein associated factor, RNA polymerase I subunit C | ENSG00000103168 | 16 | Rare Single Gene Mutation, Genetic Association                        |
| <i>TAF6</i>    | TATA-box binding protein associated factor 6                           | ENSG00000106290 | 7  | Rare Single Gene Mutation                                             |
| <i>TANC2</i>   | etratricopeptide repeat, ankyrin repeat and coiled-coil containing 2   | ENSG00000170921 | 17 | Rare Single Gene Mutation, Syndromic                                  |
| <i>TAOK1</i>   | TAO kinase 1                                                           | ENSG00000160551 | 17 | Rare Single Gene Mutation, Syndromic                                  |
| <i>TAOK2</i>   | TAO kinase 2                                                           | ENSG00000149930 | 16 | Rare Single Gene Mutation, Functional                                 |
| <i>TBC1D31</i> | TBC1 domain family, member 31                                          | ENSG00000156787 | 8  | Rare Single Gene Mutation                                             |
| <i>TBC1D5</i>  | TBC1 domain family, member 5                                           | ENSG00000131374 | 3  | Rare Single Gene Mutation, Genetic Association                        |
| <i>TBL1XR1</i> | transducin beta like 1 X-linked receptor 1                             | ENSG00000177565 | 3  | Rare Single Gene Mutation, Syndromic                                  |
| <i>TBR1</i>    | T-box, brain, 1                                                        | ENSG00000136535 | 2  | Rare Single Gene Mutation, Syndromic, Genetic Association, Functional |
| <i>SUPT16H</i> | SPT16 homolog, facilitates chromatin remodeling subunit                | ENSG00000092201 | 14 | Rare Single Gene Mutation                                             |
| <i>SYBU</i>    | syntabulin                                                             | ENSG00000147642 | 8  | Rare Single Gene Mutation                                             |
| <i>SYCE1</i>   | synaptonemal complex central element protein 1                         | ENSG00000171772 | 10 | Rare Single Gene Mutation                                             |
| <i>SYP</i>     | synaptophysin                                                          | ENSG00000102003 | X  | Rare Single Gene Mutation                                             |
| <i>TBX22</i>   | T-box transcription factor 22                                          | ENSG00000122145 | X  | Rare Single Gene Mutation                                             |
| <i>TCF20</i>   | Transcription factor 20 (AR1)                                          | ENSG00000100207 | 22 | Rare Single Gene Mutation, Syndromic                                  |
| <i>TCF4</i>    | Transcription factor 4                                                 | ENSG00000196628 | 18 | Rare Single Gene Mutation, Syndromic, Genetic Association, Functional |



|                 |                                                          |                 |    |                                                            |
|-----------------|----------------------------------------------------------|-----------------|----|------------------------------------------------------------|
| <i>TCF7L2</i>   | Transcription factor 7-like 2 (T-cell specific, HMG-box) | ENSG00000148737 | 10 | Rare Single Gene Mutation                                  |
| <i>TECTA</i>    | tectorin alpha                                           | ENSG00000109927 | 11 | Rare Single Gene Mutation                                  |
| <i>TERF2</i>    | Telomeric repeat binding factor 2                        | ENSG00000132604 | 16 | Rare Single Gene Mutation                                  |
| <i>TERB2</i>    | telomere repeat binding bouquet formation protein 2      | ENSG00000167014 | 15 | Rare Single Gene Mutation                                  |
| <i>TET2</i>     | Tet methylcytosine dioxygenase 2                         | ENSG00000168769 | 4  | Rare Single Gene Mutation                                  |
| <i>THBS1</i>    | Thrombospondin 1                                         | ENSG00000137801 | 15 | Rare Single Gene Mutation, Genetic Association             |
| <i>THRA</i>     | thyroid hormone receptor alpha                           | ENSG00000126351 | 17 | Rare Single Gene Mutation, Functional                      |
| <i>TLK2</i>     | tousled-like kinase 2                                    | ENSG00000146872 | 17 | Rare Single Gene Mutation, Syndromic                       |
| <i>TM4SF19</i>  | transmembrane 4 L six family member 19                   | ENSG00000145107 | 3  | Rare Single Gene Mutation                                  |
| <i>TM4SF20</i>  | Transmembrane 4 L six family member 20                   | ENSG00000168955 | 2  | Rare Single Gene Mutation                                  |
| <i>TMEM39B</i>  | transmembrane protein 39B                                | ENSG00000121775 | 1  | Rare Single Gene Mutation                                  |
| <i>TMLHE</i>    | trimethyllysine hydroxylase, epsilon                     | ENSG00000185973 | X  | Rare Single Gene Mutation, Genetic Association             |
| <i>TNRC6B</i>   | Trinucleotide repeat containing 6B                       | ENSG00000100354 | 22 | Rare Single Gene Mutation, Syndromic                       |
| <i>TOP3B</i>    | Topoisomerase (DNA) III beta                             | ENSG00000100038 | 22 | Rare Single Gene Mutation, Genetic Association, Functional |
| <i>TRAF7</i>    | TNF receptor associated factor 7                         | ENSG00000131653 | 16 | Rare Single Gene Mutation, Syndromic                       |
| <i>TRAPPC6B</i> | trafficking protein particle complex 6B                  | ENSG00000182400 | 14 | Rare Single Gene Mutation, Syndromic                       |
| <i>TRAPPC9</i>  | trafficking protein particle complex 9                   | ENSG00000167632 | 8  | Rare Single Gene Mutation, Syndromic                       |

|                 |                                                                    |                 |    |                                                           |
|-----------------|--------------------------------------------------------------------|-----------------|----|-----------------------------------------------------------|
| <i>TRIO</i>     | Trio Rho guanine nucleotide exchange factor                        | ENSG00000038382 | 5  | Rare Single Gene Mutation, Syndromic                      |
| <i>TRIP12</i>   | Thyroid hormone receptor interactor 12                             | ENSG00000153827 | 2  | Rare Single Gene Mutation, Syndromic                      |
| <i>TRPC6</i>    | Transient receptor potential cation channel, subfamily C, member 6 | ENSG00000137672 | 11 | Rare Single Gene Mutation                                 |
| <i>TRPM1</i>    | transient receptor potential cation channel subfamily M member 1   | ENSG00000134160 | 15 | Rare Single Gene Mutation                                 |
| <i>TRRAP</i>    | transformation/transcripti on domain associated protein            | ENSG00000196367 | 7  | Rare Single Gene Mutation, Syndromic                      |
| <i>TSC1</i>     | tuberous sclerosis 1                                               | ENSG00000165699 | 9  | Rare Single Gene Mutation, Syndromic                      |
| <i>TSC2</i>     | tuberous sclerosis 2                                               | ENSG00000103197 | 16 | Rare Single Gene Mutation, Syndromic, Genetic Association |
| <i>TEK</i>      | TEKreceptortyrosine kinase                                         | ENSG00000120156 | 9  | Rare Single Gene Mutation                                 |
| <i>TET3</i>     | tet methylcytosine dioxygenase 3                                   | ENSG00000187605 | 2  | Rare Single Gene Mutation, Syndromic                      |
| <i>TFB2M</i>    | transcription factor B2, mitochondrial                             | ENSG00000162851 | 1  | Rare Single Gene Mutation                                 |
| <i>TM9SF4</i>   | transmembrane 9 superfamily member 4                               | ENSG00000101337 | 20 | Rare Single Gene Mutation                                 |
| <i>TMEM134</i>  | transmembrane protein 134                                          | ENSG00000172663 | 11 | Rare Single Gene Mutation                                 |
| <i>TRAPPC2L</i> | trafficking protein particle complex 2 like                        | ENSG00000167515 | 16 | Rare Single Gene Mutation, Syndromic                      |
| <i>TRIM23</i>   | tripartite motif containing 23                                     | ENSG00000113595 | 5  | Rare Single Gene Mutation                                 |
| <i>TRIM32</i>   | tripartite motif containing 32                                     | ENSG00000119401 | 9  | Rare Single Gene Mutation, Functional                     |

|                |                                                       |                 |    |                                                           |
|----------------|-------------------------------------------------------|-----------------|----|-----------------------------------------------------------|
| <i>TSHZ3</i>   | teashirt zinc finger<br>homeobox 3                    | ENSG00000121297 | 19 | Rare Single Gene Mutation, Functional                     |
| <i>TSPAN17</i> | tetraspanin 17                                        | ENSG00000048140 | 5  | Rare Single Gene Mutation                                 |
| <i>TSPAN4</i>  | tetraspanin 4                                         | ENSG00000214063 | 11 | Rare Single Gene Mutation                                 |
| <i>TSPAN7</i>  | tetraspanin 7                                         | ENSG00000156298 | X  | Rare Single Gene Mutation                                 |
| <i>TTI2</i>    | TELO2 interacting<br>protein 2                        | ENSG00000129696 | 8  | Rare Single Gene Mutation                                 |
| <i>TTN</i>     | titin                                                 | ENSG00000155657 | 2  | Rare Single Gene Mutation, Syndromic                      |
| <i>TNS2</i>    | tensin 2                                              | ENSG00000111077 | 12 | Rare Single Gene Mutation                                 |
| <i>TSPOAP1</i> | TSPO associated protein<br>1                          | ENSG00000005379 | 17 | Rare Single Gene Mutation                                 |
| <i>TUBGCP5</i> | tubulin, gamma complex<br>associated protein 5        | ENSG00000275835 | 15 | Rare Single Gene Mutation                                 |
| <i>UBE3A</i>   | ubiquitin protein ligase<br>E3A                       | ENSG00000114062 | 15 | Rare Single Gene Mutation, Syndromic, Genetic Association |
| <i>UBE3C</i>   | Ubiquitin protein ligase<br>E3C                       | ENSG00000009335 | 7  | Rare Single Gene Mutation                                 |
| <i>UBN2</i>    | ubiquitin protein ligase<br>ubiquitin protein ligase  | ENSG00000157741 | 7  | Rare Single Gene Mutation                                 |
| <i>UBR5</i>    | E3 component n-recogin<br>5                           | ENSG00000104517 | 8  | Rare Single Gene Mutation                                 |
| <i>UIMC1</i>   | ubiquitin interaction<br>motif containing 1           | ENSG00000087206 | 5  | Rare Single Gene Mutation                                 |
| <i>UNC13A</i>  | unc-13 homolog A                                      | ENSG00000130477 | 19 | Rare Single Gene Mutation, Syndromic                      |
| <i>UNC79</i>   | unc-79 homolog, NALCN<br>channel complex subunit      | ENSG00000133958 | 14 | Rare Single Gene Mutation                                 |
| <i>UNC80</i>   | unc-80 homolog, NALCN<br>activator                    | ENSG00000144406 | 2  | Rare Single Gene Mutation                                 |
| <i>UPF2</i>    | UPF2, regulator of<br>nonsense mediated<br>mRNA decay | ENSG00000151461 | 10 | Rare Single Gene Mutation, Functional                     |

|               |                                                          |                 |    |                                                  |
|---------------|----------------------------------------------------------|-----------------|----|--------------------------------------------------|
| <i>UPF3B</i>  | UPF3B, regulator of nonsense mediated mRNA decay         | ENSG00000125351 | X  | Rare Single Gene Mutation, Syndromic             |
| <i>USH2A</i>  | usherin                                                  | ENSG00000042781 | 1  | Rare Single Gene Mutation                        |
| <i>USP15</i>  | ubiquitin specific peptidase 15                          | ENSG00000135655 | 12 | Rare Single Gene Mutation                        |
| <i>USP45</i>  | Ubiquitin specific peptidase 45                          | ENSG00000123552 | 6  | Rare Single Gene Mutation                        |
| <i>USP7</i>   | Ubiquitin specific peptidase 7 (herpes virus-associated) | ENSG00000187555 | 16 | Rare Single Gene Mutation, Syndromic             |
| <i>USP9X</i>  | ubiquitin specific peptidase 9 X-linked                  | ENSG00000124486 | X  | Rare Single Gene Mutation, Syndromic, Functional |
| <i>USP9Y</i>  | ubiquitin specific peptidase 9, Y-linked                 | ENSG00000114374 | Y  | Rare Single Gene Mutation, Genetic Association   |
| <i>VAMP2</i>  | vesicle associated membrane protein 2                    | ENSG00000220205 | 17 | Rare Single Gene Mutation, Syndromic             |
| <i>VIL1</i>   | Villin 1                                                 | ENSG00000127831 | 2  | Rare Single Gene Mutation                        |
| <i>VPS13B</i> | vacuolar protein sorting 13 homolog B (yeast)            | ENSG00000132549 | 8  | Rare Single Gene Mutation, Syndromic             |
| <i>VSIG4</i>  | V-set and immunoglobulin domain                          | ENSG00000155659 | X  | Rare Single Gene Mutation                        |
| <i>WAC</i>    | WW domain containing adaptor with coiled-coil            | ENSG00000095787 | 10 | Rare Single Gene Mutation, Syndromic             |
| <i>WDFY3</i>  | WD repeat and FYVE domain containing 3                   | ENSG00000163625 | 4  | Rare Single Gene Mutation, Syndromic, Functional |
| <i>UNC5D</i>  | unc-5 netrin receptor D                                  | ENSG00000156687 | 8  | Rare Single Gene Mutation                        |
| <i>VEZF1</i>  | vascular endothelial zinc finger 1                       | ENSG00000136451 | 17 | Rare Single Gene Mutation                        |
| <i>VWA7</i>   | von Willebrand factor A domain containing 7              | ENSG00000204396 | 6  | Rare Single Gene Mutation                        |
| <i>WDFY4</i>  | WDFY family member 4                                     | ENSG00000128815 | 10 | Rare Single Gene Mutation                        |
| <i>WDR26</i>  | WD repeat domain 26                                      | ENSG00000162923 | 1  | Rare Single Gene Mutation, Syndromic             |

|                |                                                                     |                 |    |                                                  |
|----------------|---------------------------------------------------------------------|-----------------|----|--------------------------------------------------|
| <i>WNK3</i>    | WNK lysine deficient protein kinase 3                               | ENSG00000196632 | X  | Rare Single Gene Mutation                        |
| <i>WWOX</i>    | WW domain containing oxidoreductase                                 | ENSG00000186153 | 16 | Rare Single Gene Mutation, Syndromic             |
| <i>WWP1</i>    | WW domain containing E3 ubiquitin protein ligase 1                  | ENSG00000123124 | 8  | Rare Single Gene Mutation                        |
| <i>XPC</i>     | xeroderma pigmentosum, complementation group C                      | ENSG00000154767 | 3  | Rare Single Gene Mutation, Syndromic             |
| <i>XPO1</i>    | exportin 1                                                          | ENSG00000082898 | 2  | Rare Single Gene Mutation, Genetic Association   |
| <i>YEATS2</i>  | YEATS domain containing 2                                           | ENSG00000163872 | 3  | Rare Single Gene Mutation, Genetic Association   |
| <i>YTHDC2</i>  | YTH domain containing tyrosine 3-                                   | ENSG00000047188 | 5  | Rare Single Gene Mutation, Genetic Association   |
| <i>YWHAE</i>   | monooxygenase/tryptophan 5-monooxygenase activation protein epsilon | ENSG00000108953 | 17 | Rare Single Gene Mutation                        |
| <i>UBR1</i>    | ubiquitin protein ligase E3 component n-recogin 1                   | ENSG00000159459 | 15 | Rare Single Gene Mutation                        |
| <i>XRCC6</i>   | X-ray repair cross complementing 6 tyrosine 3-                      | ENSG00000196419 | 22 | Rare Single Gene Mutation                        |
| <i>YWHAG</i>   | monooxygenase/tryptophan 5-monooxygenase activation protein gamma   | ENSG00000170027 | 7  | Rare Single Gene Mutation, Syndromic             |
| <i>YY1</i>     | YY1transcription factor                                             | ENSG00000100811 | 14 | Rare Single Gene Mutation, Syndromic, Functional |
| <i>ZBTB20</i>  | Zinc finger and BTB domain containing 20                            | ENSG00000181722 | 3  | Rare Single Gene Mutation, Syndromic             |
| <i>ZC3H11A</i> | zinc finger CCCH-type containing 11A                                | ENSG00000058673 | 1  | Rare Single Gene Mutation                        |
| <i>ZC3H4</i>   | zinc finger CCCH-type containing 4                                  | ENSG00000130749 | 19 | Rare Single Gene Mutation                        |

|                |                                      |                 |    |                                                |
|----------------|--------------------------------------|-----------------|----|------------------------------------------------|
| <i>ZFYVE26</i> | zinc finger FYVE-type containing 26  | ENSG00000072121 | 14 | Rare Single Gene Mutation                      |
| <i>ZMYND11</i> | Zinc finger, MYND-type containing 11 | ENSG00000015171 | 10 | Rare Single Gene Mutation, Syndromic           |
| <i>ZNF18</i>   | zinc finger protein 18               | ENSG00000154957 | 17 | Rare Single Gene Mutation                      |
| <i>ZNF292</i>  | zinc finger protein 292              | ENSG00000188994 | 6  | Rare Single Gene Mutation, Syndromic           |
| <i>ZMIZ1</i>   | zinc finger MIZ-type containing 1    | ENSG00000108175 | 10 | Rare Single Gene Mutation, Syndromic           |
| <i>ZMYND8</i>  | zinc finger MYND-type containing 8   | ENSG00000101040 | 20 | Rare Single Gene Mutation                      |
| <i>ZNF462</i>  | Zinc finger protein 462              | ENSG00000148143 | 9  | Rare Single Gene Mutation, Syndromic           |
| <i>ZNF517</i>  | Zinc finger protein 517              | ENSG00000197363 | 8  | Rare Single Gene Mutation                      |
| <i>ZNF548</i>  | zinc finger protein 548              | ENSG00000188785 | 19 | Rare Single Gene Mutation                      |
| <i>ZNF559</i>  | Zinc finger protein 559              | ENSG00000188321 | 19 | Rare Single Gene Mutation                      |
| <i>ZNF626</i>  | zinc finger protein 626              | ENSG00000188171 | 19 | Rare Single Gene Mutation                      |
| <i>ZNF713</i>  | Zinc finger protein 713              | ENSG00000178665 | 7  | Rare Single Gene Mutation                      |
| <i>ZNF774</i>  | Zinc finger protein 774              | ENSG00000196391 | 15 | Rare Single Gene Mutation                      |
| <i>ZNF804A</i> | Zinc finger protein 804A             | ENSG00000170396 | 2  | Rare Single Gene Mutation, Genetic Association |
| <i>ZWILCH</i>  | zwilchkinetochore protein            | ENSG00000174442 | 15 | Rare Single Gene Mutation                      |

Reference: SFARI Gene. [(accessed on 29 October 2020)]; Available online: <https://gene.sfari.org/>.

**Table S2. The known genes with common variants of ASD.**

| <b>Gene symbol</b> | <b>Gene name</b>                                       | <b>Ensembl ID</b> | <b>Chromosome</b> | <b>Genetics category</b>                                      |
|--------------------|--------------------------------------------------------|-------------------|-------------------|---------------------------------------------------------------|
| <i>ABAT</i>        | 4-aminobutyrate<br>aminotransferase                    | ENSG00000183044   | 16                | Rare Single Gene Mutation, Genetic Association                |
| <i>ACE</i>         | angiotensin I<br>converting enzyme                     | ENSG00000159640   | 17                | Rare Single Gene Mutation, Genetic Association                |
| <i>ADA</i>         | adenosine deaminase                                    | ENSG00000196839   | 20                | Rare Single Gene Mutation, Genetic Association                |
| <i>AGMO</i>        | alkylglycerol<br>monooxygenase                         | ENSG00000187546   | 7                 | Rare Single Gene Mutation, Genetic Association                |
| <i>AH11</i>        | Abelson helper<br>integration site 1                   | ENSG00000135541   | 6                 | Rare Single Gene Mutation, Syndromic, Genetic Association     |
| <i>AMPD1</i>       | Adenosine<br>monophosphate<br>deaminase 1              | ENSG00000116748   | 1                 | Rare Single Gene Mutation, Genetic Association                |
| <i>ANK3</i>        | ankyrin 3                                              | ENSG00000151150   | 10                | Rare Single Gene Mutation, Genetic Association                |
| <i>ARNT2</i>       | aryl-hydrocarbon<br>receptor nuclear<br>translocator 2 | ENSG00000172379   | 15                | Rare Single Gene Mutation, Syndromic, Genetic Association     |
| <i>ASMT</i>        | acetylserotonin O-<br>methyltransferase                | ENSG00000196433   | X,Y               | Rare Single Gene Mutation, Genetic Association                |
| <i>ASTN2</i>       | astrotactin 2                                          | ENSG00000148219   | 9                 | Rare Single Gene Mutation, Genetic Association                |
| <i>ADORA2A</i>     | adenosine A2a<br>receptor                              | ENSG00000128271   | 22                | Genetic Association                                           |
| <i>ADRB2</i>       | adrenergic, beta-2-,<br>receptor, surface<br>Probable  | ENSG00000169252   | 5                 | Genetic Association                                           |
| <i>ATP10A</i>      | phospholipid-<br>transporting ATPase<br>VA             | ENSG00000206190   | 15                | Rare Single Gene Mutation, Genetic Association,<br>Functional |
| <i>AR</i>          | androgen receptor<br>ATPase, Ca <sup>++</sup>          | ENSG00000169083   | X                 | Genetic Association                                           |
| <i>ATP2B2</i>      | transporting, plasma<br>membrane 2                     | ENSG00000157087   | 3                 | Rare Single Gene Mutation, Genetic Association                |

|                |                                                                |                 |    |                                                                       |
|----------------|----------------------------------------------------------------|-----------------|----|-----------------------------------------------------------------------|
| <i>AUTS2</i>   | autism susceptibility candidate 2                              | ENSG00000158321 | 7  | Rare Single Gene Mutation, Syndromic, Genetic Association, Functional |
| <i>AVPRIA</i>  | arginine vasopressin receptor 1A                               | ENSG00000166148 | 12 | Rare Single Gene Mutation, Genetic Association                        |
| <i>BST1</i>    | bone marrow stromal cell antigen 1                             | ENSG00000109743 | 4  | Genetic Association, Functional                                       |
| <i>C4B</i>     | complement component 4B                                        | ENSG00000203710 | 6  | Rare Single Gene Mutation, Genetic Association, Functional            |
| <i>CACNA1A</i> | Calcium channel, voltage-dependent, P/Q type, alpha 1A subunit | ENSG00000141837 | 19 | Rare Single Gene Mutation, Genetic Association                        |
| <i>CACNA1B</i> | calcium voltage-gated channel subunit alpha1 B                 | ENSG00000148408 | 9  | Rare Single Gene Mutation, Syndromic, Genetic Association             |
| <i>CACNA1C</i> | calcium channel, voltage-dependent, L type, alpha 1C subunit   | ENSG00000151067 | 12 | Rare Single Gene Mutation, Syndromic, Genetic Association, Functional |
| <i>CACNA1D</i> | calcium channel, voltage-dependent, L type, alpha 1D           | ENSG00000157388 | 3  | Rare Single Gene Mutation, Syndromic, Genetic Association, Functional |
| <i>CACNA1F</i> | calcium channel, voltage-dependent, alpha 1F                   | ENSG00000102001 | X  | Rare Single Gene Mutation, Genetic Association                        |
| <i>CACNA1G</i> | calcium channel, voltage-dependent, T type, alpha 1G           | ENSG00000006283 | 17 | Rare Single Gene Mutation, Syndromic, Genetic Association             |
| <i>AVPR1B</i>  | arginine vasopressin receptor 1B                               | ENSG00000198049 | 1  | Genetic Association, Functional                                       |
| <i>CACNA1I</i> | Calcium channel, voltage-dependent, T type, alpha 1I subunit   | ENSG00000100346 | 22 | Rare Single Gene Mutation, Genetic Association                        |



|               |                                                            |                 |    |                                                                       |
|---------------|------------------------------------------------------------|-----------------|----|-----------------------------------------------------------------------|
| <i>CACNB2</i> | Calcium channel,<br>voltage-dependent,<br>beta 2 subunit   | ENSG00000165995 | 10 | Rare Single Gene Mutation, Genetic Association                        |
| <i>CADM2</i>  | Cell adhesion<br>molecule 2                                | ENSG00000175161 | 3  | Rare Single Gene Mutation, Genetic Association                        |
| <i>CADPS</i>  | calcium dependent<br>secretion activator                   | ENSG00000163618 | 3  | Rare Single Gene Mutation, Genetic Association                        |
| <i>BICDL1</i> | BICD family like<br>cargo adaptor 1                        | ENSG00000135127 | 12 | Genetic Association                                                   |
| <i>CAMK2A</i> | calcium/calmodulin<br>dependent protein<br>kinase II alpha | ENSG00000070808 | 5  | Rare Single Gene Mutation, Syndromic, Genetic Association, Functional |
| <i>CAMK4</i>  | Calcium/calmodulin-<br>dependent protein<br>kinase IV      | ENSG00000152495 | 5  | Genetic Association                                                   |
| <i>CD38</i>   | CD38 molecule                                              | ENSG00000004468 | 4  | Rare Single Gene Mutation, Genetic Association, Functional            |
| <i>CD99L2</i> | CD99 molecule like 2                                       | ENSG00000102181 | X  | Genetic Association                                                   |
| <i>CDH10</i>  | cadherin 10, type 2<br>(T2-cadherin)                       | ENSG00000040731 | 5  | Rare Single Gene Mutation, Genetic Association                        |
| <i>CDH22</i>  | cadherin-like 22                                           | ENSG00000149654 | 20 | Genetic Association                                                   |
| <i>CDH9</i>   | cadherin 9, type 2<br>(T1-cadherin)                        | ENSG00000113100 | 5  | Rare Single Gene Mutation, Genetic Association                        |
| <i>CELF6</i>  | CUGBP, Elav-like<br>family member 6                        | ENSG00000140488 | 15 | Rare Single Gene Mutation, Genetic Association                        |
| <i>CHRM3</i>  | cholinergic receptor<br>muscarinic 3                       | ENSG00000133019 | 1  | Rare Single Gene Mutation, Genetic Association                        |
| <i>CMIP</i>   | c-Maf inducing<br>protein                                  | ENSG00000153815 | 16 | Rare Single Gene Mutation, Genetic Association                        |
| <i>CNR1</i>   | cannabinoid receptor<br>1 (brain)                          | ENSG00000118432 | 6  | Rare Single Gene Mutation, Genetic Association                        |
| <i>CNTN4</i>  | contactin 4                                                | ENSG00000144619 | 3  | Rare Single Gene Mutation, Syndromic, Genetic Association             |

|                |                                                            |                 |    |                                                            |
|----------------|------------------------------------------------------------|-----------------|----|------------------------------------------------------------|
| <i>CNTN5</i>   | Contactin 5                                                | ENSG00000149972 | 11 | Rare Single Gene Mutation, Genetic Association             |
| <i>CNTN6</i>   | Contactin 6                                                | ENSG00000134115 | 3  | Rare Single Gene Mutation, Genetic Association             |
| <i>CNTNAP2</i> | contactin associated protein-like 2                        | ENSG00000174469 | 7  | Rare Single Gene Mutation, Syndromic, Genetic Association  |
| <i>CNTNAP5</i> | contactin associated protein-like 5                        | ENSG00000155052 | 2  | Rare Single Gene Mutation, Genetic Association             |
| <i>CREBBP</i>  | CREB binding protein                                       | ENSG00000005339 | 16 | Rare Single Gene Mutation, Syndromic, Genetic Association  |
| <i>CSMD1</i>   | CUB and Sushi multiple domains 1                           | ENSG00000183117 | 8  | Rare Single Gene Mutation, Genetic Association             |
| <i>CTNNA3</i>  | catenin (cadherin-associated protein), alpha 3             | ENSG00000183230 | 10 | Rare Single Gene Mutation, Genetic Association             |
| <i>CUL3</i>    | Cullin 3                                                   | ENSG00000036257 | 2  | Rare Single Gene Mutation, Genetic Association             |
| <i>CLIP2</i>   | CAP-Gly domain containing linker protein 2                 | ENSG00000106665 | 7  | Genetic Association                                        |
| <i>CYFIP1</i>  | cytoplasmic FMR1 interacting protein 1                     | ENSG00000273749 | 15 | Rare Single Gene Mutation, Genetic Association, Functional |
| <i>DISC1</i>   | disrupted in schizophrenia 1                               | ENSG00000162946 | 1  | Rare Single Gene Mutation, Syndromic, Genetic Association  |
| <i>DDHD2</i>   | DDHD domain containing 2                                   | ENSG00000085788 | 8  | Rare Single Gene Mutation, Genetic Association, Functional |
| <i>DLGAP3</i>  | DLG associated protein 3                                   | ENSG00000116544 | 1  | Rare Single Gene Mutation, Genetic Association, Functional |
| <i>DMD</i>     | dystrophin (muscular dystrophy, Duchenne and Becker types) | ENSG00000198947 | X  | Rare Single Gene Mutation, Syndromic, Genetic Association  |
| <i>DNAH17</i>  | dynein axonemal heavy chain 17                             | ENSG00000187775 | 17 | Rare Single Gene Mutation, Genetic Association             |
| <i>DNER</i>    | Delta/notch-like EGF repeat containing                     | ENSG00000187957 | 2  | Rare Single Gene Mutation, Genetic Association             |

|               |                                                 |                 |    |                                                            |
|---------------|-------------------------------------------------|-----------------|----|------------------------------------------------------------|
| <i>DNMT3A</i> | DNA (cytosine-5-)-methyltransferase 3 alpha     | ENSG00000119772 | 2  | Rare Single Gene Mutation, Syndromic, Genetic Association  |
| <i>DOCK4</i>  | Dedicator of cytokinesis 4                      | ENSG00000128512 | 7  | Rare Single Gene Mutation, Genetic Association, Functional |
| <i>DPP10</i>  | Dipeptidyl-peptidase 10                         | ENSG00000175497 | 2  | Rare Single Gene Mutation, Genetic Association             |
| <i>DPP4</i>   | Dipeptidyl-peptidase 4                          | ENSG00000197635 | 2  | Rare Single Gene Mutation, Genetic Association             |
| <i>DPP6</i>   | dipeptidyl-peptidase 6                          | ENSG00000130226 | 7  | Rare Single Gene Mutation, Genetic Association, Functional |
| <i>DPYD</i>   | dihydropyrimidine dehydrogenase                 | ENSG00000188641 | 1  | Rare Single Gene Mutation, Syndromic, Genetic Association  |
| <i>DPYSL2</i> | dihydropyrimidinase like 2                      | ENSG00000092964 | 8  | Rare Single Gene Mutation, Genetic Association, Functional |
| <i>DRD2</i>   | Dopamine receptor D2                            | ENSG00000149295 | 11 | Rare Single Gene Mutation, Genetic Association             |
| <i>DRD3</i>   | dopamine receptor D3                            | ENSG00000151577 | 3  | Rare Single Gene Mutation, Genetic Association             |
| <i>DSCAM</i>  | Down syndrome cell adhesion molecule            | ENSG00000171587 | 21 | Rare Single Gene Mutation, Genetic Association             |
| <i>DUSP15</i> | dual specificity phosphatase 15                 | ENSG00000149599 | 20 | Rare Single Gene Mutation, Genetic Association             |
| <i>DDC</i>    | dopa decarboxylase                              | ENSG00000132437 | 7  | Genetic Association                                        |
| <i>DLX2</i>   | distal-less homeobox 2                          | ENSG00000115844 | 2  | Genetic Association                                        |
| <i>DRD1</i>   | Dopamine receptor D1                            | ENSG00000184845 | 5  | Genetic Association, Functional                            |
| <i>DCC</i>    | DCCnetrin 1 receptor                            | ENSG00000187323 | 18 | Genetic Association                                        |
| <i>EIF4E</i>  | eukaryotic translation initiation factor 4E     | ENSG00000151247 | 4  | Rare Single Gene Mutation, Genetic Association             |
| <i>ELAVL2</i> | ELAV like neuron-specific RNA binding protein 2 | ENSG00000107105 | 9  | Rare Single Gene Mutation, Genetic Association, Functional |

|               |                                               |                 |    |                                                                       |
|---------------|-----------------------------------------------|-----------------|----|-----------------------------------------------------------------------|
| <i>ELP4</i>   | Elongator acetyltransferase complex subunit 4 | ENSG00000109911 | 11 | Rare Single Gene Mutation, Genetic Association                        |
| <i>EN2</i>    | engrailed homolog 2                           | ENSG00000164778 | 7  | Rare Single Gene Mutation, Genetic Association, Functional            |
| <i>ESR2</i>   | estrogen receptor 2 (ER beta)                 | ENSG00000140009 | 14 | Rare Single Gene Mutation, Syndromic, Genetic Association             |
| <i>ESRRB</i>  | estrogen-related receptor beta                | ENSG00000119715 | 14 | Rare Single Gene Mutation, Genetic Association                        |
| <i>EXT1</i>   | Exostosin 1                                   | ENSG00000182197 | 8  | Rare Single Gene Mutation, Genetic Association                        |
| <i>FAN1</i>   | FANCD2/FANCI-associated nuclease 1            | ENSG00000198690 | 15 | Rare Single Gene Mutation, Genetic Association                        |
| <i>FBXO40</i> | F-box protein 40                              | ENSG00000163833 | 3  | Rare Single Gene Mutation, Genetic Association                        |
| <i>FEZF2</i>  | FEZ family zinc finger 2                      | ENSG00000153266 | 3  | Rare Single Gene Mutation, Genetic Association                        |
| <i>FGA</i>    | Fibrinogen alpha                              | ENSG00000171560 | 4  | Rare Single Gene Mutation, Genetic Association                        |
| <i>FHIT</i>   | fragile histidine triad gene                  | ENSG00000189283 | 3  | Rare Single Gene Mutation, Genetic Association                        |
| <i>FMR1</i>   | fragile X mental retardation 1                | ENSG00000102081 | X  | Rare Single Gene Mutation, Syndromic, Genetic Association, Functional |
| <i>FOXP1</i>  | Forkhead box P1                               | ENSG00000114861 | 3  | Rare Single Gene Mutation, Syndromic, Genetic Association, Functional |
| <i>FOXP2</i>  | forkhead box P2                               | ENSG00000128573 | 7  | Rare Single Gene Mutation, Genetic Association                        |
| <i>ELOVL2</i> | ELOVL fatty acid elongase 2                   | ENSG00000197977 | 6  | Genetic Association                                                   |
| <i>ERG</i>    | ERG, ETS transcription factor                 | ENSG00000157554 | 21 | Genetic Association                                                   |
| <i>FBXO33</i> | F-box protein 33                              | ENSG00000165355 | 14 | Genetic Association                                                   |
| <i>FRK</i>    | fyn-related kinase                            | ENSG00000111816 | 6  | Rare Single Gene Mutation, Genetic Association                        |

|                |                                                                         |                 |    |                                                                       |
|----------------|-------------------------------------------------------------------------|-----------------|----|-----------------------------------------------------------------------|
| <i>GABBR2</i>  | gamma-aminobutyric acid type B receptor subunit 2                       | ENSG00000136928 | 9  | Rare Single Gene Mutation, Syndromic, Genetic Association, Functional |
| <i>GABRA4</i>  | gamma-aminobutyric acid (GABA) A receptor, alpha 4                      | ENSG00000109158 | 4  | Rare Single Gene Mutation, Genetic Association, Functional            |
| <i>GABRB3</i>  | gamma-aminobutyric acid (GABA) A receptor, beta 3                       | ENSG00000166206 | 15 | Rare Single Gene Mutation, Genetic Association                        |
| <i>GABRG3</i>  | gamma-aminobutyric acid type A receptor gamma3 subunit polypeptide N-   | ENSG00000182256 | 15 | Genetic Association                                                   |
| <i>GALNT14</i> | acetylgalactosaminyltransferase 14                                      | ENSG00000158089 | 2  | Rare Single Gene Mutation, Genetic Association                        |
| <i>GAS2</i>    | Growth arrest-specific 2                                                | ENSG00000148935 | 11 | Genetic Association                                                   |
| <i>GDA</i>     | guanine deaminase                                                       | ENSG00000119125 | 9  | Rare Single Gene Mutation, Genetic Association                        |
| <i>GLIS1</i>   | GLIS family zinc finger 1                                               | ENSG00000174332 | 1  | Rare Single Gene Mutation, Genetic Association                        |
| <i>GLO1</i>    | glyoxalase I                                                            | ENSG00000124767 | 6  | Rare Single Gene Mutation, Genetic Association                        |
| <i>GNB1L</i>   | guanine nucleotide binding protein (G protein), beta polypeptide 1-like | ENSG00000185838 | 22 | Rare Single Gene Mutation, Genetic Association                        |
| <i>GPC6</i>    | glypican 6                                                              | ENSG00000183098 | 13 | Rare Single Gene Mutation, Genetic Association                        |
| <i>GPD2</i>    | glycerol-3-phosphate dehydrogenase 2                                    | ENSG00000115159 | 2  | Rare Single Gene Mutation, Genetic Association                        |
| <i>GPR85</i>   | G protein-coupled receptor 85                                           | ENSG00000164604 | 7  | Rare Single Gene Mutation, Genetic Association                        |
| <i>GPX1</i>    | glutathione peroxidase 1                                                | ENSG00000233276 | 3  | Genetic Association                                                   |

|                |                                                         |                 |    |                                                            |
|----------------|---------------------------------------------------------|-----------------|----|------------------------------------------------------------|
| <i>GRID1</i>   | Glutamate receptor, ionotropic, delta 1                 | ENSG00000182771 | 10 | Rare Single Gene Mutation, Genetic Association             |
| <i>GRID2</i>   | glutamate receptor, ionotropic, delta 2                 | ENSG00000152208 | 4  | Rare Single Gene Mutation, Syndromic, Genetic Association  |
| <i>GRIK2</i>   | glutamate ionotropic receptor kainate type subunit 2    | ENSG00000164418 | 6  | Rare Single Gene Mutation, Genetic Association             |
| <i>FGFR1</i>   | fibroblast growth factor receptor 1                     | ENSG00000077782 | 8  | Genetic Association                                        |
| <i>GALNT10</i> | polypeptide N-acetylgalactosaminyltransferase 10        | ENSG00000164574 | 5  | Genetic Association                                        |
| <i>GRIK3</i>   | glutamate ionotropic receptor kainate type subunit 3    | ENSG00000163873 | 1  | Rare Single Gene Mutation, Genetic Association             |
| <i>GRIN2A</i>  | glutamate receptor, ionotropic, N-methyl D-aspartate 2A | ENSG00000183454 | 16 | Rare Single Gene Mutation, Syndromic, Genetic Association  |
| <i>GRIN2B</i>  | glutamate receptor, ionotropic, N-methyl D-aspartate 2B | ENSG00000273079 | 12 | Rare Single Gene Mutation, Syndromic, Genetic Association  |
| <i>GRM5</i>    | glutamate metabotropic receptor 5                       | ENSG00000168959 | 11 | Rare Single Gene Mutation, Genetic Association, Functional |
| <i>GRM7</i>    | Glutamate receptor, metabotropic 7                      | ENSG00000196277 | 3  | Rare Single Gene Mutation, Genetic Association             |
| <i>GTF2I</i>   | general transcription factor Ii                         | ENSG00000263001 | 7  | Rare Single Gene Mutation, Genetic Association             |
| <i>GUCY1A2</i> | guanylate cyclase 1 soluble subunit alpha 2             | ENSG00000152402 | 11 | Rare Single Gene Mutation, Genetic Association             |

|                 |                                                                                  |                 |    |                                                           |
|-----------------|----------------------------------------------------------------------------------|-----------------|----|-----------------------------------------------------------|
| <i>HCN1</i>     | Hyperpolarization<br>activated cyclic<br>nucleotide-gated<br>potassium channel 1 | ENSG00000164588 | 5  | Rare Single Gene Mutation, Genetic Association            |
| <i>HDAC4</i>    | histone deacetylase 4                                                            | ENSG00000068024 | 2  | Rare Single Gene Mutation, Syndromic, Genetic Association |
| <i>HIVEP3</i>   | human<br>immunodeficiency<br>virus type I enhancer<br>binding protein 3<br>major | ENSG00000127124 | 1  | Rare Single Gene Mutation, Genetic Association            |
| <i>HLA-DPB1</i> | histocompatibility<br>complex, class II, DP<br>beta 1                            | ENSG00000223865 | 6  | Rare Single Gene Mutation, Genetic Association            |
| <i>HOXA1</i>    | homeobox A1                                                                      | ENSG00000105991 | 7  | Rare Single Gene Mutation, Syndromic, Genetic Association |
| <i>HRAS</i>     | v-Ha-ras Harvey rat<br>sarcoma viral<br>oncogene homolog                         | ENSG00000174775 | 11 | Rare Single Gene Mutation, Syndromic, Genetic Association |
| <i>GSTM1</i>    | glutathione S-<br>transferase M1<br>major                                        | ENSG00000134184 | 1  | Genetic Association                                       |
| <i>HLA-A</i>    | histocompatibility<br>complex, class I, A<br>Major                               | ENSG00000206503 | 6  | Genetic Association                                       |
| <i>HLA-B</i>    | histocompatibility<br>complex, class I, B<br>major                               | ENSG00000234745 | 6  | Genetic Association                                       |
| <i>HLA-DRB1</i> | histocompatibility<br>complex, class II, DR<br>beta 1                            | ENSG00000196126 | 6  | Genetic Association                                       |

|                 |                                                                           |                 |    |                                                            |
|-----------------|---------------------------------------------------------------------------|-----------------|----|------------------------------------------------------------|
| <i>HLA-G</i>    | major histocompatibility complex, class I, G                              | ENSG00000204632 | 6  | Genetic Association                                        |
| <i>HMGNI</i>    | high mobility group nucleosome binding domain 1                           | ENSG00000205581 | 21 | Genetic Association                                        |
| <i>HS3ST5</i>   | heparan sulfate (glucosamine) 3-O-sulfotransferase 5                      | ENSG00000249853 | 6  | Genetic Association                                        |
| <i>HTR1B</i>    | 5-hydroxytryptamine (serotonin) receptor 1B                               | ENSG00000135312 | 6  | Rare Single Gene Mutation, Genetic Association             |
| <i>HTR3A</i>    | 5-hydroxytryptamine (serotonin) receptor 3A                               | ENSG00000166736 | 11 | Rare Single Gene Mutation, Genetic Association, Functional |
| <i>HTR3C</i>    | 5-hydroxytryptamine (serotonin) receptor 3, family member C               | ENSG00000178084 | 3  | Rare Single Gene Mutation, Genetic Association             |
| <i>HYDIN</i>    | HYDIN, axonemal central pair apparatus protein                            | ENSG00000157423 | 16 | Rare Single Gene Mutation, Genetic Association             |
| <i>IL1RAPL2</i> | interleukin 1 receptor accessory protein-like 2                           | ENSG00000189108 | X  | Rare Single Gene Mutation, Genetic Association             |
| <i>IMMP2L</i>   | IMP2 inner mitochondrial membrane peptidase-like ( <i>S. cerevisiae</i> ) | ENSG00000184903 | 7  | Rare Single Gene Mutation, Genetic Association, Functional |
| <i>INPP1</i>    | inositol polyphosphate-1-phosphatase                                      | ENSG00000151689 | 2  | Rare Single Gene Mutation, Genetic Association             |



|               |                                                                |                 |    |                                                           |
|---------------|----------------------------------------------------------------|-----------------|----|-----------------------------------------------------------|
| <i>ITGB3</i>  | integrin, beta 3<br>(platelet glycoprotein IIIa, antigen CD61) | ENSG00000259207 | 17 | Rare Single Gene Mutation, Genetic Association            |
| <i>ITPR1</i>  | inositol 1,4,5-trisphosphate receptor type 1                   | ENSG00000150995 | 3  | Rare Single Gene Mutation, Genetic Association            |
| <i>JARID2</i> | jumonji and AT-rich interaction domain containing 2            | ENSG00000008083 | 6  | Rare Single Gene Mutation, Syndromic, Genetic Association |
| <i>KCND2</i>  | potassium voltage-gated channel subfamily D member 2           | ENSG00000184408 | 7  | Rare Single Gene Mutation, Genetic Association            |
| <i>KCND3</i>  | potassium voltage-gated channel subfamily D member 3           | ENSG00000171385 | 1  | Rare Single Gene Mutation, Syndromic, Genetic Association |
| <i>KCNJ10</i> | potassium voltage-gated channel subfamily J member 10          | ENSG00000177807 | 1  | Rare Single Gene Mutation, Syndromic, Genetic Association |
| <i>KCNQ2</i>  | potassium voltage-gated channel subfamily Q member 2           | ENSG00000075043 | 20 | Rare Single Gene Mutation, Syndromic, Genetic Association |
| <i>KCNQ3</i>  | potassium voltage-gated channel subfamily Q member 3           | ENSG00000184156 | 8  | Rare Single Gene Mutation, Genetic Association            |
| <i>KMT2E</i>  | Lysine (K)-specific methyltransferase 2E                       | ENSG00000005483 | 7  | Rare Single Gene Mutation, Syndromic, Genetic Association |

|                |                                                                 |                 |    |                                                                       |
|----------------|-----------------------------------------------------------------|-----------------|----|-----------------------------------------------------------------------|
| <i>KRR1</i>    | KRR1, small subunit (SSU) processome component, homolog (yeast) | ENSG00000111615 | 12 | Rare Single Gene Mutation, Genetic Association                        |
| <i>LAMA1</i>   | Laminin, alpha 1                                                | ENSG00000101680 | 18 | Rare Single Gene Mutation, Genetic Association                        |
| <i>LAMB1</i>   | laminin, beta 1                                                 | ENSG00000091136 | 7  | Rare Single Gene Mutation, Genetic Association                        |
| <i>LRFN2</i>   | leucine rich repeat and fibronectin type III domain containing  | ENSG00000156564 | 6  | Rare Single Gene Mutation, Genetic Association, Functional            |
| <i>LRFN5</i>   | leucine rich repeat and fibronectin type III domain containing  | ENSG00000165379 | 14 | Rare Single Gene Mutation, Genetic Association                        |
| <i>LRP2</i>    | LDL receptor related protein 2                                  | ENSG00000081479 | 2  | Rare Single Gene Mutation, Syndromic, Genetic Association             |
| <i>LRRC1</i>   | leucine rich repeat containing 1                                | ENSG00000137269 | 6  | Rare Single Gene Mutation, Genetic Association                        |
| <i>MACROD2</i> | MACRO domain containing 2                                       | ENSG00000172264 | 20 | Rare Single Gene Mutation, Genetic Association                        |
| <i>MAOA</i>    | monoamine oxidase A                                             | ENSG00000189221 | X  | Rare Single Gene Mutation, Syndromic, Genetic Association, Functional |
| <i>MAOB</i>    | monoamine oxidase B                                             | ENSG00000069535 | X  | Rare Single Gene Mutation, Genetic Association, Functional            |
| <i>MARK1</i>   | microtubule affinity regulating kinase 1                        | ENSG00000116141 | 1  | Rare Single Gene Mutation, Genetic Association                        |
| <i>MDGA2</i>   | MAM domain containing glycosylphosphatidylinositol anchor 2     | ENSG00000139915 | 14 | Rare Single Gene Mutation, Genetic Association                        |
| <i>LMX1B</i>   | LIM homeobox transcription factor 1 beta                        | ENSG00000136944 | 9  | Genetic Association                                                   |

|                 |                                                                             |                 |    |                                                                          |
|-----------------|-----------------------------------------------------------------------------|-----------------|----|--------------------------------------------------------------------------|
| <i>LZTS2</i>    | leucine zipper,<br>putative tumor<br>suppressor 2                           | ENSG00000107816 | 10 | Genetic Association                                                      |
| <i>MAPT-AS1</i> | MAPT antisense<br>RNA 1                                                     | ENSG00000264589 | 17 | Genetic Association                                                      |
| <i>MEF2C</i>    | myocyte enhancer<br>factor 2C                                               | ENSG00000081189 | 5  | Rare Single Gene Mutation, Syndromic, Genetic<br>Association, Functional |
| <i>MEGF10</i>   | multiple EGF like<br>domains 10                                             | ENSG00000145794 | 5  | Rare Single Gene Mutation, Genetic Association                           |
| <i>MET</i>      | met proto-oncogene<br>(hepatocyte growth<br>factor receptor)<br>MAX network | ENSG00000105976 | 7  | Rare Single Gene Mutation, Genetic Association,<br>Functional            |
| <i>MNT</i>      | transcriptional<br>repressor                                                | ENSG00000070444 | 17 | Genetic Association                                                      |
| <i>MIR137</i>   | microRNA 137                                                                | ENSG00000284202 | 1  | Rare Single Gene Mutation, Syndromic, Genetic<br>Association, Functional |
| <i>MRTFB</i>    | myocardin related<br>transcription factor B                                 | ENSG00000186260 | 16 | Rare Single Gene Mutation, Genetic Association                           |
| <i>MSNP1AS</i>  | Moesin pseudogene 1,<br>antisense                                           | ENSG00000251593 | 5  | Genetic Association, Functional                                          |
| <i>MTF1</i>     | metal-regulatory<br>transcription factor 1                                  | ENSG00000188786 | 1  | Syndromic, Genetic Association                                           |
| <i>MTHFR</i>    | methylenetetrahydrof<br>olate reductase<br>(NAD(P)H)                        | ENSG00000177000 | 1  | Rare Single Gene Mutation, Syndromic, Genetic<br>Association             |
| <i>MYO16</i>    | myosin XVI                                                                  | ENSG00000041515 | 13 | Rare Single Gene Mutation, Genetic Association                           |
| <i>MYO5A</i>    | myosin VA                                                                   | ENSG00000197535 | 15 | Rare Single Gene Mutation, Genetic Association                           |
| <i>MYTIL</i>    | Myelin transcription<br>factor 1-like                                       | ENSG00000186487 | 2  | Rare Single Gene Mutation, Syndromic, Genetic<br>Association             |
| <i>NAALADL2</i> | N-acetylated alpha-<br>linked acidic<br>dipeptidase-like 2                  | ENSG00000177694 | 3  | Rare Single Gene Mutation, Genetic Association                           |

|               |                                                                                 |                 |    |                                                                       |
|---------------|---------------------------------------------------------------------------------|-----------------|----|-----------------------------------------------------------------------|
| <i>NEGR1</i>  | neuronal growth regulator 1                                                     | ENSG00000172260 | 1  | Rare Single Gene Mutation, Genetic Association, Functional            |
| <i>NF1</i>    | neurofibromin 1 (neurofibromatosis, von Recklinghausen disease, Watson disease) | ENSG00000196712 | 17 | Rare Single Gene Mutation, Syndromic, Genetic Association             |
| <i>NLGN1</i>  | neuroligin 1                                                                    | ENSG00000169760 | 3  | Rare Single Gene Mutation, Genetic Association                        |
| <i>NLGN4X</i> | neuroligin 4, X-linked                                                          | ENSG00000146938 | X  | Rare Single Gene Mutation, Genetic Association                        |
| <i>NLGN4Y</i> | neuroligin 4, Y-linked                                                          | ENSG00000165246 | Y  | Rare Single Gene Mutation, Genetic Association, Functional            |
| <i>NRCAM</i>  | neuronal cell adhesion molecule                                                 | ENSG00000091129 | 7  | Rare Single Gene Mutation, Genetic Association                        |
| <i>NRP2</i>   | neuropilin 2                                                                    | ENSG00000118257 | 2  | Rare Single Gene Mutation, Genetic Association                        |
| <i>NRXN1</i>  | neurexin 1                                                                      | ENSG00000179915 | 2  | Rare Single Gene Mutation, Syndromic, Genetic Association, Functional |
| <i>NDUFA5</i> | NADH dehydrogenase (ubiquinone) 1 alpha                                         | ENSG00000128609 | 7  | Genetic Association                                                   |
| <i>NPAS2</i>  | neuronal PAS domain protein 2                                                   | ENSG00000170485 | 2  | Genetic Association                                                   |
| <i>NRXN2</i>  | neurexin 2                                                                      | ENSG00000110076 | 11 | Rare Single Gene Mutation, Genetic Association                        |
| <i>NRXN3</i>  | neurexin 3                                                                      | ENSG00000021645 | 14 | Rare Single Gene Mutation, Genetic Association                        |
| <i>NTNG1</i>  | netrin G1                                                                       | ENSG00000162631 | 1  | Rare Single Gene Mutation, Syndromic, Genetic Association             |
| <i>NTRK3</i>  | neurotrophic tyrosine kinase, receptor, type 3                                  | ENSG00000140538 | 15 | Rare Single Gene Mutation, Syndromic, Genetic Association             |
| <i>OR2M4</i>  | Olfactory receptor, family 2, subfamily M, member 4                             | ENSG00000171180 | 1  | Genetic Association                                                   |
| <i>OTX1</i>   | orthodenticle homeobox 1                                                        | ENSG00000115507 | 2  | Genetic Association                                                   |

|                |                                                       |                 |    |                                                            |
|----------------|-------------------------------------------------------|-----------------|----|------------------------------------------------------------|
| <i>OXT</i>     | oxytocin/neurophysin I prepropeptide                  | ENSG00000101405 | 20 | Rare Single Gene Mutation, Genetic Association             |
| <i>OXTR</i>    | oxytocin receptor                                     | ENSG00000180914 | 3  | Rare Single Gene Mutation, Genetic Association, Functional |
| <i>PARD3B</i>  | Par-3 partitioning defective 3 homolog B (C. elegans) | ENSG00000116117 | 2  | Rare Single Gene Mutation, Genetic Association             |
| <i>PATJ</i>    | PATJ, crumbs cell polarity complex component          | ENSG00000132849 | 1  | Rare Single Gene Mutation, Genetic Association             |
| <i>PCDH15</i>  | protocadherin related 15                              | ENSG00000150275 | 10 | Rare Single Gene Mutation, Syndromic, Genetic Association  |
| <i>PCDH9</i>   | protocadherin 9                                       | ENSG00000184226 | 13 | Rare Single Gene Mutation, Genetic Association             |
| <i>PCDHA1</i>  | Protocadherin alpha 1                                 | ENSG00000204970 | 5  | Rare Single Gene Mutation, Genetic Association             |
| <i>PCDHA10</i> | Protocadherin alpha 10                                | ENSG00000250120 | 5  | Rare Single Gene Mutation, Genetic Association             |
| <i>PCDHA11</i> | Protocadherin alpha 11                                | ENSG00000249158 | 5  | Rare Single Gene Mutation, Genetic Association             |
| <i>PCDHA12</i> | Protocadherin alpha 12                                | ENSG00000251664 | 5  | Rare Single Gene Mutation, Genetic Association             |
| <i>PCDHA13</i> | Protocadherin alpha 13                                | ENSG00000239389 | 5  | Rare Single Gene Mutation, Genetic Association             |
| <i>PCDHA2</i>  | Protocadherin alpha 2                                 | ENSG00000204969 | 5  | Rare Single Gene Mutation, Genetic Association             |
| <i>PCDHA3</i>  | Protocadherin alpha 3                                 | ENSG00000255408 | 5  | Rare Single Gene Mutation, Genetic Association             |
| <i>PCDHA4</i>  | Protocadherin alpha 4                                 | ENSG00000204967 | 5  | Rare Single Gene Mutation, Genetic Association             |
| <i>PCDHA5</i>  | Protocadherin alpha 5                                 | ENSG00000204965 | 5  | Rare Single Gene Mutation, Genetic Association             |
| <i>PCDHA6</i>  | Protocadherin alpha 6                                 | ENSG00000081842 | 5  | Rare Single Gene Mutation, Genetic Association             |
| <i>PCDHA7</i>  | Protocadherin alpha 7                                 | ENSG00000204963 | 5  | Rare Single Gene Mutation, Genetic Association             |
| <i>PCDHA8</i>  | Protocadherin alpha 8                                 | ENSG00000204962 | 5  | Rare Single Gene Mutation, Genetic Association             |
| <i>PCDHA9</i>  | Protocadherin alpha 9                                 | ENSG00000204961 | 5  | Rare Single Gene Mutation, Genetic Association             |
| <i>PCDHAC1</i> | Protocadherin alpha subfamily C, 1                    | ENSG00000248383 | 5  | Rare Single Gene Mutation, Genetic Association             |
| <i>PDE1C</i>   | phosphodiesterase 1C                                  | ENSG00000154678 | 7  | Rare Single Gene Mutation, Genetic Association             |

|                |                                                                                     |                 |    |                                                |
|----------------|-------------------------------------------------------------------------------------|-----------------|----|------------------------------------------------|
| <i>PER1</i>    | period homolog 1<br>(Drosophila)                                                    | ENSG00000179094 | 17 | Rare Single Gene Mutation, Genetic Association |
| <i>PEX7</i>    | peroxisomal<br>biogenesis factor 7                                                  | ENSG00000112357 | 6  | Rare Single Gene Mutation, Genetic Association |
| <i>PITX1</i>   | paired-like<br>homeodomain 1                                                        | ENSG00000069011 | 5  | Rare Single Gene Mutation, Genetic Association |
| <i>PLAUR</i>   | Plasminogen<br>activator, urokinase                                                 | ENSG00000011422 | 19 | Rare Single Gene Mutation, Genetic Association |
| <i>PREX1</i>   | Phosphatidylinositol-<br>3,4,5-trisphosphate-<br>dependent Rac<br>exchange factor 1 | ENSG00000124126 | 20 | Rare Single Gene Mutation, Genetic Association |
| <i>PRKCB</i>   | protein kinase C beta                                                               | ENSG00000166501 | 16 | Rare Single Gene Mutation, Genetic Association |
| <i>PRKN</i>    | parkin RBR E3<br>ubiquitin protein<br>ligase                                        | ENSG00000185345 | 6  | Rare Single Gene Mutation, Genetic Association |
| <i>PRODH</i>   | Proline<br>dehydrogenase                                                            | ENSG00000100033 | 22 | Syndromic, Genetic Association                 |
| <i>PSD3</i>    | pleckstrin and Sec7<br>domain containing 3                                          | ENSG00000156011 | 8  | Rare Single Gene Mutation, Genetic Association |
| <i>PTBP2</i>   | polypyrimidine tract<br>binding protein 2                                           | ENSG00000117569 | 1  | Rare Single Gene Mutation, Genetic Association |
| <i>PTCHD1</i>  | patched domain<br>containing 1                                                      | ENSG00000165186 | X  | Rare Single Gene Mutation, Genetic Association |
| <i>PCDHAC2</i> | Protocadherin alpha<br>subfamily C, 2                                               | ENSG00000243232 | 5  | Genetic Association                            |
| <i>PHB</i>     | prohibitin                                                                          | ENSG00000167085 | 17 | Genetic Association                            |
| <i>PIK3CG</i>  | phosphoinositide-3-<br>kinase, catalytic,                                           | ENSG00000105851 | 7  | Genetic Association                            |
| <i>PONI</i>    | gamma polypeptide<br>paraoxonase 1                                                  | ENSG00000005421 | 7  | Genetic Association                            |

|                |                                                          |                 |    |                                                                       |
|----------------|----------------------------------------------------------|-----------------|----|-----------------------------------------------------------------------|
| <i>PPP1R1B</i> | Protein phosphatase 1, regulatory (inhibitor) subunit 1B | ENSG00000131771 | 17 | Genetic Association                                                   |
| <i>PTGS2</i>   | prostaglandin-endoperoxide synthase 2                    | ENSG00000073756 | 1  | Rare Single Gene Mutation, Genetic Association, Functional            |
| <i>PTPRB</i>   | protein tyrosine phosphatase, receptor type B            | ENSG00000127329 | 12 | Rare Single Gene Mutation, Genetic Association                        |
| <i>PTPRC</i>   | protein tyrosine phosphatase, receptor type, C           | ENSG00000081237 | 1  | Rare Single Gene Mutation, Genetic Association                        |
| <i>RASSF5</i>  | Ras association domain family member 5                   | ENSG00000266094 | 1  | Rare Single Gene Mutation, Genetic Association                        |
| <i>RBFOX1</i>  | RNA binding protein, fox-1 homolog (C. elegans) 1        | ENSG00000078328 | 16 | Rare Single Gene Mutation, Genetic Association                        |
| <i>RELN</i>    | Reelin                                                   | ENSG00000189056 | 7  | Rare Single Gene Mutation, Syndromic, Genetic Association, Functional |
| <i>RERE</i>    | Arginine-glutamic acid dipeptide (RE) repeats            | ENSG00000142599 | 1  | Rare Single Gene Mutation, Syndromic, Genetic Association             |
| <i>RIMS1</i>   | Regulating synaptic membrane exocytosis 1                | ENSG00000079841 | 6  | Rare Single Gene Mutation, Genetic Association                        |
| <i>RNF135</i>  | Ring finger protein 135                                  | ENSG00000181481 | 17 | Rare Single Gene Mutation, Syndromic, Genetic Association             |
| <i>ROBO2</i>   | roundabout guidance receptor 2                           | ENSG00000185008 | 3  | Rare Single Gene Mutation, Genetic Association, Functional            |
| <i>RORA</i>    | RAR-related orphan receptor A                            | ENSG00000069667 | 15 | Rare Single Gene Mutation, Syndromic, Genetic Association, Functional |

|                    |                                                                                                                                             |                 |    |                                                            |
|--------------------|---------------------------------------------------------------------------------------------------------------------------------------------|-----------------|----|------------------------------------------------------------|
| <i>SATB2</i>       | SATB homeobox 2                                                                                                                             | ENSG00000119042 | 2  | Rare Single Gene Mutation, Syndromic, Genetic Association  |
| <i>RIMS2</i>       | regulating synaptic membrane exocytosis 2                                                                                                   | ENSG00000176406 | 8  | Rare Single Gene Mutation, Syndromic, Genetic Association  |
| <i>RSRC1</i>       | arginine and serine rich coiled-coil 1                                                                                                      | ENSG00000174891 | 3  | Syndromic, Genetic Association                             |
| <i>SCN1A</i>       | sodium channel, voltage-gated, type I, alpha subunit                                                                                        | ENSG00000144285 | 2  | Rare Single Gene Mutation, Syndromic, Genetic Association  |
| <i>RHOXF1</i>      | Rhox homeobox family, member 1                                                                                                              | ENSG00000101883 | X  | Genetic Association                                        |
| <i>RIT2</i>        | Ras-like without CAAX 2                                                                                                                     | ENSG00000152214 | 18 | Genetic Association                                        |
| <i>RPS10P2-AS1</i> | ribosomal protein S10 pseudogene 2 anti-sense 1                                                                                             | ENSG00000124614 | 20 | Genetic Association, Functional                            |
| <i>SDC2</i>        | syndecan 2 (heparan sulfate proteoglycan 1, cell surface-associated, fibroglycan )                                                          | ENSG00000169439 | 8  | Rare Single Gene Mutation, Genetic Association             |
| <i>SEMA5A</i>      | sema domain, seven thrombospondin repeats (type 1 and type 1-like), transmembrane domain (TM) and short cytoplasmic domain, (semaphorin) 5A | ENSG00000112902 | 5  | Rare Single Gene Mutation, Genetic Association, Functional |
| <i>SERPINE1</i>    | serpin family E member 1                                                                                                                    | ENSG00000106366 | 7  | Genetic Association                                        |



|                 |                                                                                                                               |                 |    |                                                                       |
|-----------------|-------------------------------------------------------------------------------------------------------------------------------|-----------------|----|-----------------------------------------------------------------------|
| <i>SEZ6L2</i>   | SEZ6L2 seizure related 6 homolog (mouse)-like 2                                                                               | ENSG00000174938 | 16 | Rare Single Gene Mutation, Genetic Association                        |
| <i>SHANK1</i>   | SH3 and multiple ankyrin repeat domains 1                                                                                     | ENSG00000161681 | 19 | Rare Single Gene Mutation, Genetic Association                        |
| <i>SHANK2</i>   | SH3 and multiple ankyrin repeat domains 2                                                                                     | ENSG00000162105 | 11 | Rare Single Gene Mutation, Syndromic, Genetic Association, Functional |
| <i>SHANK3</i>   | SH3 and multiple ankyrin repeat domains 3                                                                                     | ENSG00000251322 | 22 | Rare Single Gene Mutation, Syndromic, Genetic Association, Functional |
| <i>SLC1A1</i>   | solute carrier family 1 (neuronal/epithelial high affinity glutamate transporter, system Xag), member Solute carrier family 1 | ENSG00000106688 | 9  | Rare Single Gene Mutation, Genetic Association                        |
| <i>SLC1A2</i>   | (glial high affinity glutamate transporter), member Solute carrier family                                                     | ENSG00000110436 | 11 | Rare Single Gene Mutation, Genetic Association, Functional            |
| <i>SLC22A15</i> | 22, member 15 solute carrier family                                                                                           | ENSG00000163393 | 1  | Genetic Association                                                   |
| <i>SLC25A12</i> | 25 (mitochondrial carrier, Aralar), member 12                                                                                 | ENSG00000115840 | 2  | Rare Single Gene Mutation, Genetic Association, Functional            |
| <i>SLC25A27</i> | solute carrier family 25 member 27                                                                                            | ENSG00000153291 | 6  | Genetic Association                                                   |
| <i>SLC35B1</i>  | solute carrier family 35 member B1                                                                                            | ENSG00000121073 | 17 | Genetic Association                                                   |

|                |                                                                                                   |                 |    |                                                            |
|----------------|---------------------------------------------------------------------------------------------------|-----------------|----|------------------------------------------------------------|
| <i>SLC4A10</i> | solute carrier family 4, sodium bicarbonate transporter-like, member 10                           | ENSG00000144290 | 2  | Rare Single Gene Mutation, Genetic Association             |
| <i>SLC6A1</i>  | Solute carrier family 6 (neurotransmitter transporter), member 1                                  | ENSG00000157103 | 3  | Rare Single Gene Mutation, Syndromic, Genetic Association  |
| <i>SLC6A3</i>  | Solute carrier family 6 (neurotransmitter transporter), member 3                                  | ENSG00000142319 | 5  | Rare Single Gene Mutation, Genetic Association, Functional |
| <i>SLC6A4</i>  | Solute carrier family 6 (neurotransmitter transporter, serotonin), member 4                       | ENSG00000108576 | 17 | Rare Single Gene Mutation, Genetic Association             |
| <i>SLC9A9</i>  | solute carrier family 9 (sodium/hydrogen exchanger), member 9                                     | ENSG00000181804 | 3  | Rare Single Gene Mutation, Genetic Association, Functional |
| <i>SMARCA2</i> | SWI/SNF related, matrix associated, actin dependent regulator of chromatin, subfamily a, member 2 | ENSG00000080503 | 9  | Rare Single Gene Mutation, Syndromic, Genetic Association  |
| <i>SNAP25</i>  | Synaptosomal-associated protein, 25kDa                                                            | ENSG00000132639 | 20 | Rare Single Gene Mutation, Genetic Association             |
| <i>SND1</i>    | staphylococcal nuclease and tudor domain containing 1                                             | ENSG00000197157 | 7  | Rare Single Gene Mutation, Genetic Association             |
| <i>SOX5</i>    | SRY-box 5                                                                                         | ENSG00000134532 | 12 | Rare Single Gene Mutation, Syndromic, Genetic Association  |

|                |                                                                        |                 |    |                                                                       |
|----------------|------------------------------------------------------------------------|-----------------|----|-----------------------------------------------------------------------|
| <i>ST8SIA2</i> | ST8 alpha-N-acetyl-neuraminide alpha-2,8-sialyltransferase 2           | ENSG00000140557 | 15 | Rare Single Gene Mutation, Genetic Association                        |
| <i>STX1A</i>   | Syntaxin 1A (brain)                                                    | ENSG00000106089 | 7  | Rare Single Gene Mutation, Genetic Association                        |
| <i>SORCS3</i>  | sortilin related VPS10 domain containing receptor 3                    | ENSG00000156395 | 10 | Rare Single Gene Mutation, Syndromic, Genetic Association             |
| <i>STYK1</i>   | Serine/threonine/tyrosine kinase 1                                     | ENSG00000060140 | 12 | Rare Single Gene Mutation, Genetic Association                        |
| <i>SYN2</i>    | Synapsin II                                                            | ENSG00000157152 | 3  | Rare Single Gene Mutation, Genetic Association, Functional            |
| <i>SYNE1</i>   | spectrin repeat containing, nuclear envelope 1                         | ENSG00000131018 | 6  | Rare Single Gene Mutation, Genetic Association                        |
| <i>TAF1C</i>   | TATA-box binding protein associated factor, RNA polymerase I subunit C | ENSG00000103168 | 16 | Rare Single Gene Mutation, Genetic Association                        |
| <i>TBC1D5</i>  | TBC1 domain family, member 5                                           | ENSG00000131374 | 3  | Rare Single Gene Mutation, Genetic Association                        |
| <i>TBR1</i>    | T-box, brain, 1                                                        | ENSG00000136535 | 2  | Rare Single Gene Mutation, Syndromic, Genetic Association, Functional |
| <i>SOD1</i>    | superoxide dismutase 1                                                 | ENSG00000142168 | 21 | Genetic Association, Functional                                       |
| <i>STK39</i>   | serine threonine kinase 39 (STE20/SPS1 homolog, yeast)                 | ENSG00000198648 | 2  | Genetic Association                                                   |
| <i>SYT17</i>   | synaptotagmin XVII                                                     | ENSG00000103528 | 16 | Genetic Association                                                   |
| <i>TBLIX</i>   | transducin (beta)-like 1X-linked                                       | ENSG00000101849 | X  | Genetic Association                                                   |

|               |                                                        |                 |    |                                                                       |
|---------------|--------------------------------------------------------|-----------------|----|-----------------------------------------------------------------------|
| <i>TCF4</i>   | Transcription factor 4                                 | ENSG00000196628 | 18 | Rare Single Gene Mutation, Syndromic, Genetic Association, Functional |
| <i>THBS1</i>  | Thrombospondin 1                                       | ENSG00000137801 | 15 | Rare Single Gene Mutation, Genetic Association                        |
| <i>TMLHE</i>  | trimethyllysine hydroxylase, epsilon                   | ENSG00000185973 | X  | Rare Single Gene Mutation, Genetic Association                        |
| <i>TOP3B</i>  | Topoisomerase (DNA) III beta                           | ENSG00000100038 | 22 | Rare Single Gene Mutation, Genetic Association, Functional            |
| <i>TSC2</i>   | tuberous sclerosis 2                                   | ENSG00000103197 | 16 | Rare Single Gene Mutation, Syndromic, Genetic Association             |
| <i>UBE3A</i>  | ubiquitin protein ligase E3A                           | ENSG00000114062 | 15 | Rare Single Gene Mutation, Syndromic, Genetic Association             |
| <i>USP9Y</i>  | ubiquitin specific peptidase 9, Y-linked               | ENSG00000114374 | Y  | Rare Single Gene Mutation, Genetic Association                        |
| <i>TDO2</i>   | tryptophan 2,3-dioxygenase                             | ENSG00000151790 | 4  | Genetic Association                                                   |
| <i>TPO</i>    | Thyroid peroxidase                                     | ENSG00000115705 | 2  | Genetic Association                                                   |
| <i>TRIM33</i> | Tripartite motif containing 33                         | ENSG00000197323 | 1  | Genetic Association                                                   |
| <i>TTC25</i>  | tetratricopeptide repeat domain 25                     | ENSG00000204815 | 17 | Genetic Association                                                   |
| <i>UBE2H</i>  | ubiquitin-conjugating enzyme E2H (UBC8 homolog, yeast) | ENSG00000186591 | 7  | Genetic Association                                                   |
| <i>VASH1</i>  | vasohibin 1                                            | ENSG00000071246 | 14 | Genetic Association                                                   |
| <i>VDR</i>    | vitamin D receptor                                     | ENSG00000111424 | 12 | Genetic Association, Functional                                       |
| <i>WNT1</i>   | Wingless-type MMTV integration site family, member 1   | ENSG00000125084 | 12 | Genetic Association                                                   |
| <i>XPO1</i>   | exportin 1                                             | ENSG00000082898 | 2  | Rare Single Gene Mutation, Genetic Association                        |
| <i>YEATS2</i> | YEATS domain containing 2                              | ENSG00000163872 | 3  | Rare Single Gene Mutation, Genetic Association                        |
| <i>YTHDC2</i> | YTH domain containing 2                                | ENSG00000047188 | 5  | Rare Single Gene Mutation, Genetic Association                        |

|                |                                                        |                 |    |                                                  |
|----------------|--------------------------------------------------------|-----------------|----|--------------------------------------------------|
| <i>ZBTB16</i>  | Zinc finger and BTB domain containing 16               | ENSG00000109906 | 11 | Genetic Association                              |
| <i>ZNF385B</i> | Zinc finger protein 385B                               | ENSG00000144331 | 2  | Genetic Association                              |
| <i>ZNF804A</i> | Zinc finger protein 804A                               | ENSG00000170396 | 2  | Rare Single Gene Mutation, Genetic Association   |
| <i>ZNF827</i>  | Zinc finger protein 827                                | ENSG00000151612 | 4  | Genetic Association                              |
| <i>ZSWIM6</i>  | zinc finger SWIM-type containing 6                     | ENSG00000130449 | 5  | Syndromic, Genetic Association                   |
| <i>AFF2</i>    | AF4/FMR2 family, member 2<br>B-cell                    | ENSG00000155966 | X  | Rare Single Gene Mutation, Syndromic             |
| <i>BCL11A</i>  | CLL/lymphoma 11A (zinc finger protein)                 | ENSG00000119866 | 2  | Rare Single Gene Mutation, Syndromic             |
| <i>CNTNAP4</i> | Contactin associated protein-like 4                    | ENSG00000152910 | 16 | Rare Single Gene Mutation, Functional            |
| <i>CX3CR1</i>  | Chemokine (C-X3-C motif) receptor 1                    | ENSG00000168329 | 3  | Rare Single Gene Mutation, Functional            |
| <i>CYP11B1</i> | cytochrome P450, family 11, subfamily B, polypeptide 1 | ENSG00000160882 | 8  | Syndromic                                        |
| <i>DMPK</i>    | dystrophia myotonica-protein kinase                    | ENSG00000104936 | 19 | Rare Single Gene Mutation, Syndromic             |
| <i>HSD11B1</i> | hydroxysteroid (11-beta) dehydrogenase 1               | ENSG00000117594 | 1  | Syndromic                                        |
| <i>MBD5</i>    | Methyl-CpG binding domain protein 5                    | ENSG00000204406 | 2  | Rare Single Gene Mutation, Syndromic, Functional |
| <i>NTRK1</i>   | neurotrophic tyrosine kinase, receptor, type 1         | ENSG00000198400 | 1  | Rare Single Gene Mutation, Syndromic             |
| <i>RAI1</i>    | retinoic acid induced 1                                | ENSG00000108557 | 17 | Rare Single Gene Mutation, Syndromic             |

Reference: SFARI Gene. [(accessed on 29 October 2020)]; Available online: <https://gene.sfari.org/>.

**Table S3. Known ASD recessive inherited risk genes.**

| <b>Gene symbol</b> | <b>Location</b> | <b>#OMIM</b> | <b>Inheritance</b> | <b>#RefSeq</b> | <b>Ensembl ID</b> |
|--------------------|-----------------|--------------|--------------------|----------------|-------------------|
| <i>ABAT</i>        | 16p13.2         | 137150       | AR                 | NM_020686.5    | ENSG00000183044   |
| <i>ACE</i>         | 17q23.3         | 106180       | AR                 | NM_000789.3    | ENSG00000159640   |
| <i>ACTL6B</i>      | 7q22.1          | 612458       | AD/AR              | NM_016188.4    | ENSG00000077080   |
| <i>ACY1</i>        | 3p21.2          | 104620       | AR                 | NM_000666.2    | ENSG00000243989   |
| <i>ADA</i>         | 20q13.12        | 608958       | AR                 | NM_000022.3    | ENSG00000196839   |
| <i>ADCY3</i>       | 2p23.3          | 600291       | AR                 | NM_004036.4    | ENSG00000138031   |
| <i>ADK</i>         | 10q22.2         | 102750       | AR                 | NM_001123.3    | ENSG00000156110   |
| <i>ADSL</i>        | 22q13.1         | 608222       | AR                 | NM_000026.3    | ENSG00000239900   |
| <i>AFF2</i>        | Xq28            | 300806       | XLR                | NM_002025.3    | ENSG00000155966   |
| <i>AHI1</i>        | 6q23.3          | 608894       | AR                 | NM_017651.4    | ENSG00000135541   |
| <i>ALDH1A3</i>     | 15q26.3         | 600463       | AR                 | NM_000693.3    | ENSG00000184254   |
| <i>ALDH5A1</i>     | 6p22.2-p22.3    | 610045       | AR                 | NM_001080.3    | ENSG00000112294   |
| <i>AMPD1</i>       | 1p13.2          | 102770       | AR                 | NM_000036.2    | ENSG00000116748   |
| <i>AMT</i>         | 3p21.31         | 238310       | AR                 | NM_000481.3    | ENSG00000145020   |
| <i>ANK3</i>        | 10q21           | 600465       | AR                 | NM_020987.4    | ENSG00000151150   |
| <i>AP1S2</i>       | Xp22.2          | 300629       | XLR                | NM_003916.4    | ENSG00000182287   |
| <i>ARHGEF9</i>     | Xq11.1          | 300429       | XLR                | NM_015185.2    | ENSG00000131089   |
| <i>ARNT2</i>       | 15q25.1         | 606036       | AR                 | NM_014862.3    | ENSG00000172379   |
| <i>ARX</i>         | Xp21            | 300382       | XLR                | NM_139058.2    | ENSG00000004848   |
| <i>ASPM</i>        | 1q31.3          | 605481       | AR                 | NM_018136.4    | ENSG00000066279   |
| <i>ALG6</i>        | 1p31.3          | 604566       | AR                 | NM_013339.3    | ENSG00000088035   |
| <i>AR</i>          | Xq12            | 313700       | XLR                | NM_000044.4    | ENSG00000169083   |
| <i>ATP2B2</i>      | 3p25.3          | 108733       | AR                 | NM_001683.4    | ENSG00000157087   |
| <i>ATP6V0A2</i>    | 12q24.31        | 611716       | AR                 | NM_012463.3    | ENSG00000185344   |
| <i>ATRX</i>        | Xq21.1          | 300032       | XLD/XLR            | NM_000489.4    | ENSG00000085224   |
| <i>BBS4</i>        | 15q24.1         | 600374       | AR                 | NM_033028.4    | ENSG00000140463   |
| <i>BCORL1</i>      | Xq26.1          | 300688       | XLR                | NM_021946.4    | ENSG00000085185   |
| <i>BRCA2</i>       | 13q13.1         | 600185       | AD/AR              | NM_000059.3    | ENSG00000139618   |
| <i>BRWD3</i>       | Xq21.1          | 300553       | XLR                | NM_153252.4    | ENSG00000165288   |
| <i>C12orf57</i>    | 12p13.31        | 615140       | AR                 | NM_138425.3    | ENSG00000111678   |
| <i>CACNA1B</i>     | 9q34.3          | 601012       | AR                 | NM_000718.3    | ENSG00000148408   |

|                |                 |        |         |             |                 |
|----------------|-----------------|--------|---------|-------------|-----------------|
| <i>CACNA1D</i> | 3p21.1          | 114206 | AD/AR   | NM_000720.3 | ENSG00000157388 |
| <i>CACNA1F</i> | Xp11.23         | 300110 | XLR     | NM_005183.3 | ENSG00000102001 |
| <i>CAMK2A</i>  | 5q32            | 114078 | AD/AR   | NM_015981.3 | ENSG00000070808 |
| <i>CARD11</i>  | 7p22.2          | 607210 | AD/AR   | NM_032415.5 | ENSG00000198286 |
| <i>CC2D1A</i>  | 19p13.12        | 610055 | AR      | NM_017721.4 | ENSG00000132024 |
| <i>CCDC88C</i> | 14q32.11-q32.12 | 611204 | AD/AR   | NM_00108041 | ENSG00000015133 |
| <i>CEP135</i>  | 4q12            | 611423 | AR      | NM_025009.4 | ENSG00000174799 |
| <i>CEP290</i>  | 12q21.32        | 610142 | AR      | NM_025114.3 | ENSG00000198707 |
| <i>CEP41</i>   | 7q32.2          | 610523 | AR      | NM_018718.2 | ENSG00000106477 |
| <i>CHKB</i>    | 22q13.33        | 612395 | AR      | NM_005198.4 | ENSG00000100288 |
| <i>CHMP1A</i>  | 16q24.3         | 164010 | AR      | NM_002768.4 | ENSG00000131165 |
| <i>CHRM3</i>   | 1q43            | 118494 | AR      | NM_000740.3 | ENSG00000133019 |
| <i>CIB2</i>    | 15q25.1         | 605564 | AR      | NM_006383.3 | ENSG00000136425 |
| <i>CLN8</i>    | 8p23.3          | 607837 | AR      | NM_018941.3 | ENSG00000182372 |
| <i>CNGB3</i>   | 8q21.3          | 605080 | AR      | NM_019098.4 | ENSG00000170289 |
| <i>CNTNAP2</i> | 7q35-q36        | 604569 | AR      | NM_014141.5 | ENSG00000174469 |
| <i>CPT2</i>    | 1p32.3          | 600650 | AD/AR   | NM_000098.2 | ENSG00000157184 |
| <i>CORO1A</i>  | 16p11.2         | 605000 | AR      | NM_007074.3 | ENSG00000102879 |
| <i>CTNNA2</i>  | 2p12            | 114025 | AR      | NM_00116488 | ENSG00000066032 |
| <i>CUL7</i>    | 6p21.1          | 609577 | AR      | NM_014780.4 | ENSG00000044090 |
| <i>CYP11B1</i> | 8q24.3          | 610613 | AD/AR   | NM_000497.3 | ENSG00000160882 |
| <i>CYP27A1</i> | 2q35            | 606530 | AR      | NM_000784.3 | ENSG00000135929 |
| <i>DDX3X</i>   | Xp11.4          | 300160 | XLD/XLR | NM_00119341 | ENSG00000215301 |
| <i>DEAF1</i>   | 11p15.5         | 602635 | AD/AR   | NM_021008.3 | ENSG00000177030 |
| <i>DHCR7</i>   | 11q13.4         | 602858 | AR      | NM_001360.2 | ENSG00000172893 |
| <i>DDHD2</i>   | 8p11.23         | 615003 | AR      | NM_015214.2 | ENSG00000085788 |
| <i>DMD</i>     | Xp21.2-p21.1    | 300377 | XLR     | NM_004006.2 | ENSG00000198947 |
| <i>DNAH17</i>  | 17q25.3         | 610063 | AR      | NM_173628.4 | ENSG00000187775 |
| <i>DOCK8</i>   | 9p24.3          | 611432 | AR      | NM_203447.3 | ENSG00000107099 |
| <i>DOLK</i>    | 9q34.11         | 610746 | AR      | NM_014908.3 | ENSG00000175283 |
| <i>DPYD</i>    | 1p21.3          | 612779 | AR      | NM_000110.3 | ENSG00000188641 |
| <i>DST</i>     | 6p12.1          | 113810 | AR      | NM_001723.5 | ENSG00000151914 |
| <i>DDC</i>     | 7p12.2-p12.1    | 107930 | AR      | NM_000790.3 | ENSG00000132437 |



|                 |               |        |       |             |                 |
|-----------------|---------------|--------|-------|-------------|-----------------|
| <i>DCC</i>      | 18q21.2       | 120470 | AD/AR | NM_005215.3 | ENSG00000187323 |
| <i>EPHB2</i>    | 1p36.12       | 600997 | AR    | NM_017449.4 | ENSG00000133216 |
| <i>ESRRB</i>    | 14q24.3       | 602167 | AR    | NM_004452.3 | ENSG00000119715 |
| <i>ETFB</i>     | 19q13.41      | 130410 | AR    | NM_001985.2 | ENSG00000105379 |
| <i>EXOC6B</i>   | 2p13.2        | 607880 | AR    | NM_015189.2 | ENSG00000144036 |
| <i>FANI</i>     | 15q13.3       | 613534 | AR    | NM_014967.4 | ENSG00000198690 |
| <i>FGA</i>      | 4q31.3        | 134820 | AD/AR | NM_021871.3 | ENSG00000171560 |
| <i>ENPP1</i>    | 6q23.2        | 173335 | AD/AR | NM_006208.2 | ENSG00000197594 |
| <i>GATM</i>     | 15q21.1       | 602360 | AD/AR | NM_001482.2 | ENSG00000171766 |
| <i>GPC4</i>     | Xq26.2        | 300168 | XLR   | NM_001448.2 | ENSG00000076716 |
| <i>GPC6</i>     | 13q31.3-q32.1 | 604404 | AR    | NM_005708.4 | ENSG00000183098 |
| <i>GPHN</i>     | 14q23.3       | 603930 | AR    | NM_020806.4 | ENSG00000171723 |
| <i>GPX1</i>     | 3p21.31       | 138320 | AR    | NM_000581.3 | ENSG00000233276 |
| <i>GRID2</i>    | 4q22.1-q22.2  | 602368 | AR    | NM_001510.3 | ENSG00000152208 |
| <i>GRIK2</i>    | 6q16.3        | 138244 | AR    | NM_021956.4 | ENSG00000164418 |
| <i>FXN</i>      | 9q21.11       | 606829 | AR    | NM_000144.4 | ENSG00000165060 |
| <i>GALNT2</i>   | 1q42.13       | 602274 | AR    | NM_004481.4 | ENSG00000143641 |
| <i>GRIN1</i>    | 9q34.3        | 138249 | AD/AR | NM_007327.3 | ENSG00000176884 |
| <i>GRIP1</i>    | 12q14.3       | 604597 | AR    | NM_021150.3 | ENSG00000155974 |
| <i>GRM7</i>     | 3p26.1        | 604101 | AR    | NM_000844.3 | ENSG00000196277 |
| <i>HCFC1</i>    | Xq28          | 300019 | XLR   | NM_005334.2 | ENSG00000172534 |
| <i>HEPACAM</i>  | 11q24.2       | 611642 | AD/AR | NM_152722.4 | ENSG00000165478 |
| <i>HERC2</i>    | 15q13.1       | 605837 | AR    | NM_004667.5 | ENSG00000128731 |
| <i>HOXA1</i>    | 7p15.2        | 142955 | AR    | NM_005522.4 | ENSG00000105991 |
| <i>HYDIN</i>    | 16q22.2       | 610812 | AR    | NM_00127097 | ENSG00000157423 |
| <i>IL1RAPL1</i> | Xp21.3-p21.2  | 300206 | XLR   | NM_014271.3 | ENSG00000169306 |
| <i>INTS1</i>    | 7p22.3        | 611345 | AR    | NM_00108045 | ENSG00000164880 |
| <i>ITGB3</i>    | 17q21.32      | 173470 | AD/AR | NM_000212.2 | ENSG00000259207 |
| <i>ITPR1</i>    | 3p26.1        | 147265 | AD/AR | NM_002222.5 | ENSG00000150995 |
| <i>IGF1</i>     | 12q23.2       | 147440 | AR    | NM_000618.4 | ENSG00000017427 |
| <i>KCNJ10</i>   | 1q23.2        | 602208 | AR    | NM_002241.4 | ENSG00000177807 |
| <i>KCNMA1</i>   | 10q22.3       | 600150 | AD/AR | NM_002247.3 | ENSG00000156113 |
| <i>KDM5B</i>    | 1q32.1        | 605393 | AR    | NM_006618.4 | ENSG00000117139 |

|               |          |        |         |             |                 |
|---------------|----------|--------|---------|-------------|-----------------|
| <i>KDM5C</i>  | Xp11.22  | 314690 | XLR     | NM_004187.3 | ENSG00000126012 |
| <i>KIF14</i>  | 1q32.1   | 611279 | AR      | NM_014875.2 | ENSG00000118193 |
| <i>KNG1</i>   | 3q27.3   | 612358 | AR      | NM_00110241 | ENSG00000113889 |
| <i>KPTN</i>   | 19q13.32 | 615620 | AR      | NM_007059.3 | ENSG00000118162 |
| <i>LAMA1</i>  | 18p11.31 | 150320 | AR      | NM_005559.3 | ENSG00000101680 |
| <i>LAMB1</i>  | 7q31.1   | 150240 | AR      | NM_002291.2 | ENSG00000091136 |
| <i>LASIL</i>  | Xq12     | 300964 | XLR     | NM_031206.4 | ENSG00000001497 |
| <i>LDLR</i>   | 19p13.2  | 606945 | AD/AR   | NM_000527.4 | ENSG00000130164 |
| <i>LEP</i>    | 7q32.1   | 164160 | AR      | NM_000230.2 | ENSG00000174697 |
| <i>LRBA</i>   | 4q31.3   | 606453 | AR      | NM_006726.4 | ENSG00000198589 |
| <i>LRP1</i>   | 12q13.3  | 107770 | AR      | NM_002332.2 | ENSG00000123384 |
| <i>LNPK</i>   | 2q31.1   | 610236 | AR      | NM_030650.3 | ENSG00000144320 |
| <i>LRP2</i>   | 2q31.1   | 600073 | AR      | NM_004525.2 | ENSG00000081479 |
| <i>LZTR1</i>  | 22q11.21 | 600574 | AD/AR   | NM_006767.3 | ENSG00000099949 |
| <i>MAOA</i>   | Xp11.3   | 309850 | XLR     | NM_000240.3 | ENSG00000189221 |
| <i>MBOAT7</i> | 19q13.42 | 606048 | AR      | NM_00114608 | ENSG00000125505 |
| <i>MCM4</i>   | 8q11.21  | 602638 | AR      | NM_005914.3 | ENSG00000104738 |
| <i>MCPH1</i>  | 8p23.1   | 607117 | AR      | NM_024596.4 | ENSG00000147316 |
| <i>MECP2</i>  | Xq28     | 300005 | XLD/XLR | NM_004992.3 | ENSG00000169057 |
| <i>MEGF10</i> | 5q23.2   | 612453 | AR      | NM_032446.2 | ENSG00000145794 |
| <i>MET</i>    | 7q31.2   | 164860 | AD/AR   | NM_00112750 | ENSG00000105976 |
| <i>MFRP</i>   | 11q23.3  | 606227 | AR      | NM_031433.3 | ENSG00000235718 |
| <i>MTHFR</i>  | 1p36.22  | 607093 | AD/AR   | NM_005957.4 | ENSG00000177000 |
| <i>MYO1E</i>  | 15q22.2  | 601479 | AR      | NM_004998.3 | ENSG00000157483 |
| <i>MYO5A</i>  | 15q21.2  | 160777 | AR      | NM_000259.3 | ENSG00000197535 |
| <i>MYLK</i>   | 3q21.1   | 600922 | AD/AR   | NM_053025.3 | ENSG00000065534 |
| <i>NRXN1</i>  | 2p16.3   | 600565 | AR      | NM_00113565 | ENSG00000179915 |
| <i>NSMCE3</i> | 15q13.1  | 608243 | AR      | NM_138704.4 | ENSG00000185115 |
| <i>NTNG2</i>  | 9q34.13  | 618689 | AR      | NM_032536.4 | ENSG00000196358 |
| <i>NTRK1</i>  | 1q23.1   | 191315 | AR      | NM_00101233 | ENSG00000198400 |
| <i>NUP133</i> | 1q42.13  | 607613 | AR      | NM_018230.3 | ENSG00000069248 |
| <i>OCRL</i>   | Xq26.1   | 300535 | XLR     | NM_000276.3 | ENSG00000122126 |
| <i>OFD1</i>   | Xp22.2   | 300170 | XLD/XLR | NM_003611.2 | ENSG00000046651 |

|                 |              |        |       |             |                 |
|-----------------|--------------|--------|-------|-------------|-----------------|
| <i>OPHN1</i>    | Xq12         | 300127 | XLR   | NM_002547.2 | ENSG00000079482 |
| <i>NUP155</i>   | 5p13.2       | 606694 | AR    | NM_153485.2 | ENSG00000113569 |
| <i>PAH</i>      | 12q23.2      | 612349 | AR    | NM_000277.2 | ENSG00000171759 |
| <i>PCCA</i>     | 13q32.3      | 232000 | AR    | NM_000282.3 | ENSG00000175198 |
| <i>PCCB</i>     | 3q22.3       | 232050 | AR    | NM_000532.4 | ENSG00000114054 |
| <i>PCDH15</i>   | 10q21.1      | 605514 | AR/DR | NM_033056.3 | ENSG00000150275 |
| <i>PEX7</i>     | 6q23.3       | 601757 | AR    | NM_000288.3 | ENSG00000112357 |
| <i>PHF8</i>     | Xp11.22      | 300560 | XLR   | NM_015107.2 | ENSG00000172943 |
| <i>PLCB1</i>    | 20p12.3      | 607120 | AR    | NM_015192.3 | ENSG00000182621 |
| <i>POMGNT1</i>  | 1p34.1       | 606822 | AR    | NM_017739.3 | ENSG00000085998 |
| <i>POMT1</i>    | 9q34.13      | 607423 | AR    | NM_007171.3 | ENSG00000130714 |
| <i>PRICKLE1</i> | 12q12        | 608500 | AR    | NM_153026.2 | ENSG00000139174 |
| <i>PRKDC</i>    | 8q11.21      | 600899 | AR    | NM_006904.6 | ENSG00000253729 |
| <i>PRKN</i>     | 6q26         | 602544 | AR    | NM_004562.2 | ENSG00000185345 |
| <i>PRODH</i>    | 22q11.21     | 606810 | AD/AR | NM_016335.4 | ENSG00000100033 |
| <i>PTCHD1</i>   | Xp22.11      | 300828 | XLR   | NM_173495.2 | ENSG00000165186 |
| <i>POLR3A</i>   | 10q22.3      | 614258 | AR    | NM_007055.3 | ENSG00000148606 |
| <i>PTPRC</i>    | 1q31.3-q32.1 | 151460 | AR    | NM_002838.4 | ENSG00000081237 |
| <i>PXDN</i>     | 2p25.3       | 605158 | AR    | NM_012293.2 | ENSG00000130508 |
| <i>RAB39B</i>   | Xq28         | 300774 | XLR   | NM_171998.3 | ENSG00000155961 |
| <i>RPL10</i>    | Xq28         | 312173 | XLR   | NM_006013.4 | ENSG00000147403 |
| <i>SASH1</i>    | 6q24.3-q25.1 | 607955 | AD/AR | NM_015278.4 | ENSG00000111961 |
| <i>RIMS2</i>    | 8q22.3       | 606630 | AR    | NM_00110011 | ENSG00000176406 |
| <i>RSRC1</i>    | 3q25.32      | 613352 | AR    | NM_016625.3 | ENSG00000174891 |
| <i>SBF1</i>     | 22q13.33     | 603560 | AR    | NM_002972.3 | ENSG00000100241 |
| <i>RAD21</i>    | 8q24.11      | 606462 | AD/AR | NM_006265.2 | ENSG00000164754 |
| <i>SCN4A</i>    | 17q23.3      | 603967 | AD/AR | NM_000334.4 | ENSG00000007314 |
| <i>SCN9A</i>    | 2q24.3       | 603415 | AD/AR | NM_002977.3 | ENSG00000169432 |
| <i>SCP2</i>     | 1p32.3       | 184755 | AR    | NM_002979.4 | ENSG00000116171 |
| <i>SERPINE1</i> | 7q22.1       | 173360 | AD/AR | NM_000602.4 | ENSG00000106366 |
| <i>SGSH</i>     | 17q25.3      | 605270 | AR    | NM_000199.4 | ENSG00000181523 |
| <i>SHOX</i>     | Xp22.33      | 312865 | PD/PR | NM_000451.3 | ENSG00000185960 |
| <i>SLC12A5</i>  | 20q13.12     | 606726 | AD/AR | NM_020708.4 | ENSG00000124140 |

|                 |              |        |         |             |                 |
|-----------------|--------------|--------|---------|-------------|-----------------|
| <i>SLC1A1</i>   | 9p24.2       | 133550 | AR      | NM_004170.5 | ENSG00000106688 |
| <i>SLC25A12</i> | 2q31.1       | 603667 | AR      | NM_003705.4 | ENSG00000115840 |
| <i>SLC45A1</i>  | 1p36.23      | 605763 | AR      | NM_00108039 | ENSG00000162426 |
| <i>SLC6A3</i>   | 5p15.33      | 126455 | AR      | NM_001044.4 | ENSG00000142319 |
| <i>SLC6A8</i>   | Xq28         | 300036 | XLR     | NM_005629.3 | ENSG00000130821 |
| <i>SLC7A7</i>   | 14q11.2      | 603593 | AR      | NM_00112610 | ENSG00000155465 |
| <i>SLCO1B3</i>  | 12p12.2      | 605495 | DR      | NM_019844.3 | ENSG00000111700 |
| <i>SNX14</i>    | 6q14.3       | 616105 | AR      | NM_153816.5 | ENSG00000135317 |
| <i>SYN1</i>     | Xp11.3-p11.2 | 313440 | XLD/XLR | NM_133499.2 | ENSG00000008056 |
| <i>SYNE1</i>    | 6q25.2       | 608441 | AD/AR   | NM_033071.3 | ENSG00000131018 |
| <i>SYNJ1</i>    | 21q22.11     | 604297 | AR      | NM_003895.3 | ENSG00000159082 |
| <i>TAF1</i>     | Xq13.1       | 313650 | XLR     | NM_004606.4 | ENSG00000147133 |
| <i>TAF6</i>     | 7q22.1       | 602955 | AR      | NM_005641.3 | ENSG00000106290 |
| <i>TBC1D23</i>  | 3q12.1-q12.2 | 617687 | AR      | NM_00119919 | ENSG00000036054 |
| <i>TBCK</i>     | 4q24         | 616899 | AR      | NM_00116343 | ENSG00000145348 |
| <i>SOD1</i>     | 21q22.11     | 147450 | AD/AR   | NM_000454.4 | ENSG00000142168 |
| <i>SYCE1</i>    | 10q26.3      | 611486 | AR      | NM_130784.3 | ENSG00000171772 |
| <i>TBX22</i>    | Xq21.1       | 300307 | XLR     | NM_00110987 | ENSG00000122145 |
| <i>TECTA</i>    | 11q23.3      | 602574 | AD/AR   | NM_005422.2 | ENSG00000109927 |
| <i>TMLHE</i>    | Xq28         | 300777 | XLR     | NM_018196.3 | ENSG00000185973 |
| <i>TRAPPC6B</i> | 14q21.1      | 610397 | AR      | NM_00107953 | ENSG00000182400 |
| <i>TRAPPC9</i>  | 8q24.3       | 611966 | AR      | NM_031466.7 | ENSG00000167632 |
| <i>TET3</i>     | 2p13.1       | 613555 | AD/AR   | NM_00128749 | ENSG00000187605 |
| <i>TRAPPC2L</i> | 16q24.3      | 610970 | AR      | NM_016209.5 | ENSG00000167515 |
| <i>TRIM32</i>   | 9q33.1       | 602290 | AR      | NM_012210.3 | ENSG00000119401 |
| <i>TSPAN7</i>   | Xp11.4       | 300096 | XLR     | NM_004615.3 | ENSG00000156298 |
| <i>TTI2</i>     | 8p12         | 614426 | AR      | NM_00110240 | ENSG00000129696 |
| <i>TTN</i>      | 2q31.2       | 188840 | AD/AR   | NM_133378.4 | ENSG00000155657 |
| <i>UNC80</i>    | 2q34         | 612636 | AR      | NM_032504.1 | ENSG00000144406 |
| <i>UPF3B</i>    | Xq24         | 300298 | XLR     | NM_080632.2 | ENSG00000125351 |
| <i>USH2A</i>    | 1q41         | 608400 | AR      | NM_206933.2 | ENSG00000042781 |
| <i>USP45</i>    | 6q16.2       | 618439 | AR      | NM_00108048 | ENSG00000123552 |
| <i>USP9X</i>    | Xp11.4       | 300072 | XLD/XLR | NM_00103959 | ENSG00000124486 |

|                |               |        |    |             |                 |
|----------------|---------------|--------|----|-------------|-----------------|
| <i>VPS13B</i>  | 8q22.2        | 607817 | AR | NM_017890.4 | ENSG00000132549 |
| <i>TDO2</i>    | 4q32.1        | 191070 | AR | NM_005651.3 | ENSG00000151790 |
| <i>TPO</i>     | 2p25.3        | 606765 | AR | NM_000547.5 | ENSG00000115705 |
| <i>TTC25</i>   | 17q21.2       | 617095 | AR | NM_031421.5 | ENSG00000204815 |
| <i>VDR</i>     | 12q13.11      | 601769 | AR | NM_00101753 | ENSG00000111424 |
| <i>WNT1</i>    | 12q13.12      | 164820 | AR | NM_005430.3 | ENSG00000125084 |
| <i>WWOX</i>    | 16q23.1-q23.2 | 605131 | AR | NM_016373.3 | ENSG00000186153 |
| <i>XPC</i>     | 3p25.1        | 613208 | AR | NM_004628.4 | ENSG00000154767 |
| <i>UBR1</i>    | 15q15.2       | 605981 | AR | NM_174916.2 | ENSG00000159459 |
| <i>ZBTB16</i>  | 11q23.2       | 176797 | AR | NM_006006.5 | ENSG00000109906 |
| <i>ZFYVE26</i> | 14q24.1       | 612012 | AR | NM_015346.3 | ENSG00000072121 |

Reference: SFARI Gene. [(accessed on 29 October 2020)]; Available online: <https://gene.sfari.org/>.

OMIM-Oline Mendelian Inheritance In Man. Available online: <https://omim.org/>.

HGMD-The Human Gene Mutation Database. Available online: <http://www.hgmd.cf.ac.uk/ac/i>

**Table S4. Human *in vitro* cell models of ASD.**

| Cell lines derived from hiPSCs | ASD associated gene | Cellular phenotype(s)                                                                                                                                                                                                               | References |
|--------------------------------|---------------------|-------------------------------------------------------------------------------------------------------------------------------------------------------------------------------------------------------------------------------------|------------|
| Cortical neurons               | <i>EHMT1</i>        | -Reduced neurite length and complexity<br>Altered neuronal activity<br>-Increased expression of proliferation genes<br>-Decreased expression of maturation and migration genes                                                      | [1]        |
|                                | <i>MECP2</i>        | -Increased synaptogenesis and dendritic complexity<br>-Altered neuronal network synchronization                                                                                                                                     | [2]        |
|                                | <i>NRXN1</i>        | -Altered ion transport and calcium signaling                                                                                                                                                                                        | [3]        |
|                                | <i>PTCHD1</i>       | -Decreased frequency of miniature excitatory postsynaptic currents<br>-N-methyl-D-aspartate receptor (NMDARs) hypofunction                                                                                                          | [4]        |
|                                | <i>PTCHD1-AS</i>    | -Decreased frequency of miniature excitatory postsynaptic currents                                                                                                                                                                  | [3]        |
|                                | <i>SHANK2</i>       | -Increased number of synapses, dendritic length and complexity<br>-Increased frequency of spontaneous excitatory postsynaptic currents<br>-Altered expression of genes associated to neuronal morphogenesis, plasticity and synapse | [5]        |
|                                | <i>SHANK3</i>       | -Synaptic alteration and decreased dendritic spines                                                                                                                                                                                 | [6-7]      |
|                                | <i>TSC2</i>         | -Mitochondria disorganization and altered mitophagy<br>-Increased soma size and neurite number<br>-mTORC1 signaling pathway hyperactivation<br>-Increased neuronal activity and upregulation of cell adhesion genes                 | [8-9]      |
| Dopaminergic neurons           | <i>RELN</i>         | -Altered neuronal migration                                                                                                                                                                                                         | [10]       |
|                                | <i>AFF2</i>         | -Alteration in genes associated with neuronal development<br>-Decreased synaptic activity: reduced spontaneous excitatory postsynaptic currents                                                                                     | [11]       |
|                                | <i>ASTN2</i>        | -Alteration in genes associated with neuronal development                                                                                                                                                                           | [11]       |

|                       |                |                                                                                                                                                                                             |         |
|-----------------------|----------------|---------------------------------------------------------------------------------------------------------------------------------------------------------------------------------------------|---------|
| Glutamatergic neurons |                | -Decreased synaptic activity: reduced spontaneous excitatory postsynaptic currents                                                                                                          |         |
|                       | <i>ATRX</i>    | -Alteration in genes associated with neuronal development<br>-Decreased synaptic activity: reduced spontaneous excitatory postsynaptic currents                                             | [11]    |
|                       | <i>CNTN5</i>   | -Increased neuronal activity                                                                                                                                                                | [12]    |
|                       | <i>KCNQ2</i>   | -Decreased synaptic activity: reduced spontaneous excitatory postsynaptic currents                                                                                                          | [11]    |
|                       | <i>SCN2A</i>   | -Alteration in genes associated with morphogenesis<br>-Decreased synaptic activity: reduced spontaneous excitatory postsynaptic currents                                                    | [11]    |
| Neuron-like cells     | <i>ARHGEF9</i> | -Altered mTORC1 signaling pathway                                                                                                                                                           | [13]    |
|                       | <i>CACNA1C</i> | -Altered calcium signaling<br>-Altered differentiation of neurons from cortical layers<br>-Increased production of norepinephrine and dopamine<br>-Altered expression of tyrosine hydrolase | [14-15] |
|                       | <i>CDKL5</i>   | -Alterations in neuronal activity                                                                                                                                                           | [16]    |
|                       | <i>CHD8</i>    | -Altered expression of genes associated with neural development, $\beta$ -catenin/Wnt signaling, extracellular matrix and skeletal system development                                       | [17]    |
|                       | <i>COSMOC</i>  | -Impaired redox homeostasis<br>-Altered <i>PTBP2</i> splicing                                                                                                                               | [18]    |
|                       | <i>FMRI</i>    | -Altered DNA methylation patterns<br>-Altered expression of genes associated with neuronal development, migration and maturation<br>-Altered neurite formation and neuronal differentiation | [19-21] |
|                       | <i>SHANK3</i>  | -Alterations in the soma and neurites, as well as alterations in synaptic transmission<br>-Altered expression of genes associated to motility and neurogenesis                              | [22-23] |
|                       | <i>TRPC6</i>   | -Reduce neurite length and complexity<br>-Altered glutamatergic synapse formation and reduced sodium influx                                                                                 | [24]    |
| Neural                | <i>CHD8</i>    | -Alterations in the expression of genes associated with neurogenesis, $\beta$ -catenin/Wnt signaling, neuronal differentiation and axonal guidance                                          | [25]    |
|                       | <i>FOXG1</i>   | -Upregulation of neural cell fate, axon guidance, synaptic and GABAergic genes, downregulation                                                                                              | [26]    |

|                            |                |                                                                                                                                                                              |         |
|----------------------------|----------------|------------------------------------------------------------------------------------------------------------------------------------------------------------------------------|---------|
| organoids                  |                | of non-neuronal genes, decreased cell cycle length, increased MAP2 density<br>-Increased inhibitory synapse density<br>-Increased GABAergic progenitor and neuron production |         |
| Neural progenitor cells    | <i>NRXN1</i>   | -Alterations in neuronal adhesion and differentiation<br>-Overactivation of mTORC1 pathway                                                                                   | [27-28] |
|                            | <i>RELN</i>    | -Alterations in neuronal adhesion and differentiation<br>-Overactivation of mTORC1 pathway                                                                                   | [29]    |
|                            | <i>TRPC6</i>   | -Altered calcium signaling and expression of genes involved in cell adhesion and neurite formation                                                                           | [24]    |
|                            | <i>ZNF804A</i> | -Altered expression of pathways mediated by interferon- $\alpha$ 2                                                                                                           | [30]    |
| Olfactory placodal neurons | <i>SHANK3</i>  | -Decreased number of synapses<br>-Alterations during neural development in the soma and neurites                                                                             | [31]    |
| Purkinje cells             | <i>TSC2</i>    | -Hypoexcitability and synaptic dysfunction<br>-mTORC1 pathway hyperactivation<br>-Altered neuronal differentiation                                                           | [32]    |

## References

1. Nagy J, et al. (2017) Altered neurite morphology and cholinergic function of induced pluripotent stem cell-derived neurons from a patient with Kleefstra Syndrome and autism. *Transl Psychiatry*. 7:e1179. 10.1038/tp.2017.144.
2. Nageshappa S, et al. (2016) Altered neuronal network and rescue in a human MECP2 duplication model. *Mol Psychiatry*. 21(2):178 – 88. 10.1038/mp.2015.128.
3. Avazzadeh S, et al. (2019) Increased Ca<sup>2+</sup> signaling in NRXN1 $\alpha$  +/- neurons derived from ASD induced pluripotent stem cells. *Mol Autism*. 10:52. 10.1186/s13229-019-0303-3.
4. Ross PJ, et al. (2020) Synaptic dysfunction in human neurons with autism-associated deletions in PTCHD1-AS. *Biol Psychiatry*. 87(2):139 – 49. 10.1016/j.biopsych.2019.07.014.
5. Zaslavsky K., et al. (2019) SHANK2 mutations associated with autism spectrum disorder cause hyperconnectivity of human neurons. *Nat Neurosci*. 22(4):556 – 64. 10.1038/s41593-019-0365-8.
6. Gouder L, et al. (2019) Altered spinogenesis in iPSC-derived cortical neurons from patients with autism carrying de novo SHANK3 mutations. *Sci Rep*. 9:94. 10.1038/s41598-018-36993-x.
7. Darville H, et al. (2016) Human pluripotent stem cell-derived cortical neurons for high throughput medication screening in autism: A proof of concept study in SHANK3 haploinsufficiency syndrome. *EBioMedicine*. 9:293 – 305. 10.1016/j.ebiom.2016.05.032.
8. Ebrahimi-Fakhari D, et al. (2016) Impaired mitochondrial dynamics and mitophagy in neuronal models of tuberous sclerosis complex. *Cell Rep*. 17:1053 – 70. 10.1016/j.celrep.2016.09.054.
9. Winden KD, et al. (2019) Biallelic mutations in TSC2 lead to abnormalities associated with cortical tubers in human iPSC-derived neurons. *J Neurosci*. 39(47):9294 – 05.



- 10.1523/JNEUROSCI.0642-19.2019.
10. Arioka Y, et al. (2018) Single-cell trajectory analysis of human homogenous neurons carrying a rare RELN variant. *Transl Psychiatry*. 8:129. 10.1038/s41398-018-0177-8.
  11. Deneault E, et al. (2018) Complete disruption of autism-susceptibility genes by gene editing predominantly reduces functional connectivity of isogenic human neurons. *Stem Cell Rep*. 11:1211 – 25. 10.1016/j.stemcr.2018.10.003.
  12. Deneault E, et al. (2019) CNTN5<sup>-/+</sup> or EHMT2<sup>-/+</sup> human iPSC-derived neurons from individuals with autism develop hyperactive neuronal networks. *Elife*. 8:e40092. 10.7554/eLife.40092.
  13. Machado COF, et al. (2016) Collybistin binds and inhibits mTORC1 signaling: A potential novel mechanism contributing to intellectual disability and autism. *Eur J Hum Genet*. 24:59 – 65. 10.1038/ejhg.2015.69.
  14. Paşca SP, et al. (2011) Using iPSC-derived neurons to uncover cellular phenotypes associated with Timothy Syndrome. *Nat Med*. 179(12):1657 – 62. 10.1038/nm.2576.
  15. Tian Y, et al. (2014) Alteration in basal and depolarization induced transcriptional network in iPSC derived neurons from Timothy Syndrome. *Genome Med*. 6:75. 10.1186/s13073-014-0075-5.
  16. Gao Y, et al. (2020) Gene replacement ameliorates deficits in mouse and human models of cyclin-dependent kinase-like 5 disorder. *Brain*. 143:811 – 32. 10.1093/brain/awaa028.
  17. Wang P, et al. (2015) CRISPR/Cas9-mediated heterozygous knockout of the autism gene CHD8 and characterization of its transcriptional networks in neurodevelopment. *Mol Autism*. 6:55. 10.1186/s13229-015-0048-6.
  18. Rontani P, et al. (2020) Impaired expression of the COSMOC/MOCOS gene unit in ASD patient stem cells. *Mol Psychiatry*. 10.1038/s41380-020-0728-2.
  19. Boland MJ, et al. (2017) Molecular analyses of neurogenic defects in a human pluripotent stem cell model of Fragile X Syndrome. *Brain*. 140:582 – 98. 10.1093/brain/aww357.
  20. Doers ME, et al. (2014) iPSC-derived forebrain neurons from FXS individuals show defects in initial neurite outgrowth. *Stem Cells Dev*. 23:1777 – 87. 10.1089/scd.2014.0030.
  21. Sheridan SD, et al. (2011) Epigenetic characterization of the FMR1 gene and aberrant neurodevelopment in human induced pluripotent stem cell models of Fragile X Syndrome. *PLoS ONE*. 6:e26203. 10.1371/journal.pone.0026203.
  22. Huang G, et al. (2019) Uncovering the functional link between SHANK3 deletions and deficiency in neurodevelopment using iPSC-derived human neurons. *Front Neuroanat*. 13:23. 10.3389/fnana.2019.00023.
  23. Shcheglovitov A, et al. (2013) SHANK3 and IGF1 restore synaptic deficits in neurons from 22q13 deletion syndrome patients. *Nature*. 503(7475):267 – 271. 10.1038/nature12618.
  24. Griesi-Oliveira K, et al. (2015) Modeling non-syndromic autism and the impact of TRPC6 disruption in human neurons. *Mol. Psychiatry*. 20:1350 – 65. 10.1038/mp.2014.141.
  25. Wang P, et al. (2017) CRISPR/Cas9-mediated heterozygous knockout of the autism gene CHD8 and characterization of its transcriptional networks in cerebral organoids derived from iPS cells. *Mol Autism*. 8:11. 10.1186/s13229-017-0124-1.
  26. Mariani J, et al. (2015) FOXG1-dependent dysregulation of GABA-glutamate neuron differentiation in autism spectrum disorders. *Cell* 162(2):375 – 90. 10.1016/j.cell.2015.06.034.
  27. Lam M, et al. (2019) Single cell analysis of autism patient with bi-allelic NRXN1-alpha deletion reveals skewed fate choice in neural progenitors and impaired neuronal functionality. *Exp Cell Res*. 383:111469. 10.1016/j.yexcr.2019.06.014.

28. Zeng L, et al. (2013) Functional impacts of NRXN1 knockdown on neurodevelopment in stem cell models. *PLoS ONE*. 8:e59685. 10.1371/journal.pone.0059685.
29. Sánchez-Sánchez SM, et al. (2018) Rare RELN variants affect Reelin-DAB1 signal transduction in Autism Spectrum Disorder. *Hum Mutat*. 39(10):1372 – 83. 10.1002/humu.23584.
30. Chen J, et al. (2015) ZNF804A transcriptional networks in differentiating neurons derived from induced pluripotent stem cells of human origin. *PLoS ONE*. 10:e0124597. 10.1371/journal.pone.0124597.
31. Kathuria A. (2018) Stem cell-derived neurons from autistic individuals with SHANK3 mutation show morphogenetic abnormalities during early development. *Mol Psychiatry*. 23:735 – 46. 10.1038/mp.2017.185.
32. Sundberg M, et al. (2018) Purkinje cells derived from TSC patients display hypoexcitability and synaptic deficits associated with reduced FMRP levels and reversed by rapamycin. *Mol Psychiatry*. 23(11):2167–83. 10.1038/s41380-018-0018-4.

**Table S5. Animal models of ASD.**

| <b>Animal model</b> | <b>ASD associated gene</b> | <b>Gene modification technique</b> | <b>Observed phenotype</b>                                                                                                                                                          | <b>References</b> |
|---------------------|----------------------------|------------------------------------|------------------------------------------------------------------------------------------------------------------------------------------------------------------------------------|-------------------|
|                     | <i>BCKDK</i>               | Spontaneous mutation               | -Neuronal alterations<br>-Reduced protein phosphorylation<br>-Infertility<br>-Altered development                                                                                  | [1]               |
|                     | <i>CACNA1C</i>             | KO by ZFN                          | -Altered social behavior and reduced USVs<br>-Increased perseverative behaviors                                                                                                    | [2,3]             |
|                     | <i>CNTNAP2</i>             | KO by ZFN                          | -Seizures<br>-Hyperactivity<br>-Altered audition and sleep routines                                                                                                                | [4,5]             |
|                     | <i>CYFIP1</i>              | KO by CRISPR/Cas9                  | -Neuronal alterations<br>-Altered behavioral flexibility in learning tasks                                                                                                         | [6]               |
|                     | <i>FMRI</i>                | KO by ZFN                          | -Increased repetitive behaviors and social alterations.<br>-Altered sensorimotor gating<br>-Memory difficulties<br>-Neuronal alterations<br>-Altered auditory responses            | [7-9]             |
|                     | <i>MECP2</i>               | KO by ZFN                          | -High mortality<br>-Malocclusion<br>-Neuronal alterations<br>-Hypoactivity<br>-Altered social interaction and speech responses.<br>-Memory alterations<br>-Decreased grip strength | [10-11]           |
|                     | <i>NLGN2</i>               | Overexpression in the hippocampus  | -Decreased response to new stimuli and aggressive behavior                                                                                                                         | [12]              |
|                     | <i>NLGN3</i>               | KO by ZFN                          | -Increased repetitive                                                                                                                                                              | [8,13]            |

|              |               |                          |                                                                                                                                                                                                                                                    |         |
|--------------|---------------|--------------------------|----------------------------------------------------------------------------------------------------------------------------------------------------------------------------------------------------------------------------------------------------|---------|
| Mouse or Rat |               |                          | <ul style="list-style-type: none"> <li>behaviors</li> <li>-Hyperactivity and altered sleep routines</li> <li>-Decreased body weight</li> <li>-Altered juvenile play behavior and startle response</li> <li>-Altered sensorimotor gating</li> </ul> |         |
|              | <i>NLGN4</i>  | KO                       | <ul style="list-style-type: none"> <li>-Aggression behavior</li> <li>-Altered social communication</li> <li>-Decreased brain volume</li> </ul>                                                                                                     | [14]    |
|              | <i>NRXN1</i>  | KO by biallelic deletion | <ul style="list-style-type: none"> <li>-Hyperactivity</li> <li>-Altered startle response</li> <li>-Memory alterations</li> </ul>                                                                                                                   | [15]    |
|              | <i>PTEN</i>   | Heterozygous KO by ZFN   | <ul style="list-style-type: none"> <li>-Neuronal alterations</li> </ul>                                                                                                                                                                            | [16]    |
|              | <i>SCN1A</i>  | KO by ENU mutagenesis    | <ul style="list-style-type: none"> <li>-Increased repetitive behaviors</li> <li>-Hyperactivity and anxiety</li> <li>-Learning and memory difficulties</li> <li>-Motor alterations</li> <li>-Reduced dopamine levels</li> </ul>                     | [17]    |
|              | <i>SHANK2</i> | KO by ZFN                | <ul style="list-style-type: none"> <li>-Alterations in social behavior</li> <li>-Hyperactivity and increased repetitive behavior</li> <li>-Memory alterations</li> <li>-Neuronal alterations</li> </ul>                                            | [18]    |
|              | <i>SHANK3</i> | KO by ZFN                | <ul style="list-style-type: none"> <li>-Alterations in social behavior</li> <li>-Neuronal alterations</li> </ul>                                                                                                                                   | [19]    |
|              | <i>TBR1</i>   | Heterozygous KO          | <ul style="list-style-type: none"> <li>-Alterations in social behavior</li> <li>-Learning deficits</li> <li>-Conditioned taste aversion defects</li> </ul>                                                                                         | [20,21] |

|  |                |                                                            |                                                                                                                                                                                           |         |
|--|----------------|------------------------------------------------------------|-------------------------------------------------------------------------------------------------------------------------------------------------------------------------------------------|---------|
|  |                |                                                            | -Axonal projection defects in amygdala<br>-Decreased NMDAR function                                                                                                                       |         |
|  | <i>TCF4</i>    | KO by CRISPR/Cas9 and KD by shRNA in the prefrontal cortex | -Altered electrophysiological properties in neurons                                                                                                                                       | [22]    |
|  | <i>TSC1</i>    | Heterozygous KO/<br>KO                                     | -Alterations in social behavior<br>-Ataxia<br>-Cerebellar deficits                                                                                                                        | [23]    |
|  | <i>TSC2</i>    | Spontaneous mutation                                       | -Enhanced episodic-like memory<br>-Enhanced seizure-induced plasticity<br>-Increased induction of phospho-p42-MAPK in the hippocampus<br>-Increased basal oxygen consumption in the brain | [24,25] |
|  | <i>UBE3A</i>   | KO by CRISPR/Cas9                                          | -Motor, learning and memory difficulties                                                                                                                                                  | [26]    |
|  | <i>ARID1B</i>  | KD by MOs                                                  | -Reduced body length<br>-Altered expression of chondrogenic/osteogenic genes                                                                                                              | [27]    |
|  | <i>ARX</i>     | KD by MOs                                                  | -Altered brain development<br>-Neuronal alterations                                                                                                                                       | [28]    |
|  | <i>AUTS2</i>   | KD by MOs                                                  | -Microcephaly<br>-Altered jaw development<br>-Motor alterations<br>-Neuronal alterations                                                                                                  | [29]    |
|  | <i>CACNA1C</i> | KD by MOs                                                  | -Cardiac alterations<br>-Altered jaw development                                                                                                                                          | [30]    |
|  | <i>CEP41</i>   | KD by MOs                                                  | -Neuronal alterations<br>-Social behavior alterations                                                                                                                                     | [31]    |
|  | <i>CHD2</i>    | KD by MOs                                                  | -Altered development<br>-Microcephaly, abnormal body curvature<br>-Swim bladder absence<br>Motor difficulties                                                                             | [32]    |
|  | <i>CHD8</i>    | KO by CRISPR/Cas9                                          | -Macrocephaly                                                                                                                                                                             | [33,34] |

|             |                       |                                       |                                                                                                                             |         |
|-------------|-----------------------|---------------------------------------|-----------------------------------------------------------------------------------------------------------------------------|---------|
| Zebrafish   |                       | and KD by MOs                         | -Reduction in post-mitotic enteric neurons                                                                                  |         |
|             | <i>CNTNAP2</i>        | KO by ZFN                             | -Altered development<br>-Microcephaly<br>-Neuronal alterations<br>-Motor alterations                                        | [35]    |
|             | <i>CTNND2</i>         | KD by MOs                             | -Reduced body length<br>-Notochord alterations                                                                              | [36]    |
|             | <i>DYRK1A</i>         | KO by TALENs                          | -Altered response to social stimuli                                                                                         | [37]    |
|             | <i>FMRI</i>           | KO by ENU-mutagenesis and CRISPR/Cas9 | -Altered cephalic development<br>-Hyperactivity<br>-Increased anxiety<br>-Altered social behavior<br>-Learning difficulties | [38-40] |
|             | <i>KCNJ10</i>         | KD by MOs                             | -Motor alterations<br>-Altered development                                                                                  | [41]    |
|             | <i>KDM6A</i>          | KD by MOs                             | -Reduced body length<br>-Altered development<br>-Notochord alterations<br>-Neuronal alterations                             | [42,43] |
|             | <i>MECP2</i>          | KO by ENU-mutagenesis and KD by MOs   | -Altered immune response<br>-Neuronal alterations                                                                           | [44-46] |
|             | <i>MET</i>            | KD by MOs                             | -High mortality<br>-Neuronal alterations                                                                                    | [47]    |
|             | <i>MYTIL</i>          | KD by MOs                             | -Reduced levels of oxytocin                                                                                                 | [48]    |
|             | <i>NBEA</i>           | KO by ENU-mutagenesis and TALENs      | -Neuronal alterations<br>-Altered response to startle stimuli                                                               | [49]    |
|             | <i>NR3C2</i>          | KO by CRISPR/Cas9                     | -Altered social behavior<br>-Altered sleep routines                                                                         | [50]    |
|             | <i>OXTR</i>           | KO by TALENs                          | -Altered oxytocin signaling pathway<br>-Memory alterations in social and non-social recognition                             | [51]    |
|             | <i>RELN</i>           | KO by TALENs                          | -Altered social behavior<br>-Altered serotonin signaling pathway                                                            | [52]    |
| <i>RERE</i> | KO by ENU-mutagenesis | -Altered startle response to stimuli  | [53]                                                                                                                        |         |

|               |                |                                        |                                                                                                                        |         |
|---------------|----------------|----------------------------------------|------------------------------------------------------------------------------------------------------------------------|---------|
|               |                |                                        | -Vision and hearing difficulties                                                                                       |         |
|               | <i>SHANK3</i>  | KO by CRISPR/Cas9                      | -Altered development<br>-Neuronal alterations<br>-Reduced social behavior,<br>-hypoactivity                            | [54,55] |
|               | <i>SYNGAP1</i> | KD by MOs                              | -Delayed development<br>-High mortality<br>-Neuronal alterations<br>-Motor difficulties                                | [54]    |
| Monkey or Dog | <i>MECP2</i>   | TALEN mediated mutation/Overexpression | -Altered social behavior<br>-Defects in recognizing emotional expressions<br>-Altered cortical and sub-cortical volume | [56,57] |
|               | <i>SHANK3</i>  | CRISPR/Cas9 mediated mutation          | -Fewer neurons and reduced spine density                                                                               | [58]    |

CRISPR/Cas9: clustered regularly interspersed short palindromic repeats/CRISPR-associated protein 9;

ENU: N-ethyl-N-nitrosourea; KD: knockdown; KO: knockout; TALEN: transcription activator-like effector nuclease; MO: morpholino phosphorodiamidate antisense oligonucleotides; ZFN: zinc-finger nuclease.

## References

1. Zigler JS, et al. (2016) A Spontaneous missense mutation in branched chain keto acid dehydrogenase kinase in the rat affects both the central and peripheral nervous systems. PLoS ONE. 11:e0160447. 10.1371/journal.pone.0160447.
2. Kisko TM, et al. (2018) Cacna1c haploinsufficiency leads to pro-social 50-kHz ultrasonic communication deficits in rats. Dis Model Mech. 11(6):dmm034116. 10.1242/dmm.034116.
3. Währ M, et al. (2020) Sex-dependent effects of Cacna1c haploinsufficiency on behavioral inhibition evoked by conspecific alarm signals in rats. Prog Neuro-Psychopharmacol Biol Psychiatry. 99:109849. 10.1016/j.pnpbp.2019.109849.
4. Scott KE, et al. (2018) Altered auditory processing, filtering, and reactivity in the Cntnap2 knock-out rat model for neurodevelopmental disorders. J Neurosci. 38(40):8588 – 604. 10.1523/JNEUROSCI.0759-18.2018.
5. Thomas AM, et al. (2017) Cntnap2 KO rats and mice exhibit epileptiform activity and abnormal sleep – wake physiology. Sleep. 40(1). 10.1093/sleep/zsw026.
6. Silva AI, et al. (2019) Cyfip1 haploinsufficient rats show white matter changes, myelin thinning, abnormal oligodendrocytes and behavioural inflexibility. Nat Commun. 10:3455. 10.1038/s41467-019-11119-7.
7. Asiminas A, et al. (2019) Sustained correction of associative learning deficits after brief, early treatment in a rat model of Fragile X Syndrome. Sci Transl Med. 11(494):eaao0498. 10.1126/scitranslmed.aao0498.
8. Hamilton SM, et al. (2014) Fmr1 and Nlgn3 KO rats: Novel tools for investigating autism spectrum disorders. Behav Neurosci. 128(2):103 – 9. 10.1037/a0035988.
9. Ruby K., et al. (2015) Abnormal neuronal morphology and neurochemistry in the auditory

- brainstem of Fmr1 KO rats. *Neuroscience*. 303:285 – 98. 10.1016/j.neuroscience.2015.06.061.
10. Engineer CT, et al. (2015) Degraded neural and behavioral processing of speech sounds in a rat model of Rett syndrome. *Neurobiol Dis*. 83:26 – 34. 10.1016/j.nbd.2015.08.019.
  11. Wu Y, et al. (2016) Characterization of Rett Syndrome-like phenotypes in Mecp2-KO rats. *J Neurodev Disord*. 8:23. 10.1186/s11689-016-9156-7.
  12. Kohl C, et al. (2013) Hippocampal neuroligin-2 overexpression leads to reduced aggression and inhibited novelty reactivity in rats. *PLoS ONE*. 8:e56871. 10.1371/journal.pone.0056871.
  13. Thomas AM, et al. (2017) Sleep/wake physiology and quantitative electroencephalogram analysis of the Neuroligin-3 KO rat model of Autism Spectrum Disorder. *Sleep*. 40(10). 10.1093/sleep/zsx138.
  14. Jamain S, et al. (2008) Reduced social interaction and ultrasonic communication in a mouse model of monogenic heritable autism. *Proc Natl Acad Sci USA*. 105(5):1710 – 5. 10.1073/pnas.0711555105.
  15. Esclassan F, et al. (2015) Phenotypic characterization of nonsocial behavioral impairment in neurexin 1 $\alpha$  KO rats. *Behav Neurosci*. 129(1):74 – 85. 10.1037/bne0000024.
  16. Rowley PA, et al. (2019) Convergent microstructural brain changes across genetic models of Autism Spectrum Disorder—A pilot study. *Psychiatry Res Neuroimaging*. 283:83 – 91. 10.1016/j.psychresns.2018.12.007.
  17. Ohmori I, et al. (2014) Methylphenidate improves learning impairments and hyperthermia-induced seizures caused by an Scn1a mutation. *Epilepsia*. 55(10):1558 – 67. 10.1111/epi.12750.
  18. Modi ME, et al. (2018) Hyperactivity and hypermotivation associated with increased striatal mGluR1 signaling in a Shank2 rat model of autism. *Front. Mol Neurosci*. 11:107. 10.3389/fnmol.2018.00107.
  19. Harony-Nicolas H, et al. (2017) Oxytocin improves behavioral and electrophysiological deficits in a novel Shank3-deficient rat. *Elife*. 6:e18904. 10.7554/eLife.18904.
  20. Huang TN, et al. (2014) Tbr1 haploinsufficiency impairs amygdalar axonal projections and results in cognitive abnormality. *Nat Neurosci*. 17(2): 240 – 7. 10.1038/nn.3626.
  21. Lee EJ, et al. (2015) Trans-synaptic zinc mobilization improves social interaction in two mouse models of autism through NMDAR activation. *Nat Commun*. 6: 7168. 10.1038/ncomms8168.
  22. Rannals MD, et al. (2016) Neurodevelopmental models of transcription factor 4 deficiency converge on a common ion channel as a potential therapeutic target for Pitt Hopkins Syndrome. *Rare Dis*. 4:e1220468. 10.1080/21675511.2016.1220468.
  23. Tsai PT, et al. (2012) Autistic-like behavior and cerebellar dysfunction in Purkinje cell Tsc1-mutant mice. *Nature*. 488(7431): 647 – 51. 10.1038/nature11310.
  24. Chi OZ, et al. (2015) Restoration of normal cerebral oxygen consumption with rapamycin treatment in a rat model of autism – tuberous sclerosis. *NeuroMol Med*. 17(3):305 – 13. 10.1007/s12017-015-8359-5.
  25. Waltereit R, et al. (2006) Enhanced episodic-like memory and kindling epilepsy in a rat model of tuberous sclerosis. *J Neurochem*. 96(2):407 – 13. 10.1111/j.1471-4159.2005.03538.x.
  26. Dodge A, et al. (2020) Generation of a novel rat model of Angelman Syndrome with a complete Ube3a gene deletion. *Autism Res*. 13(3):397 – 409. 10.1002/aur.2267.
  27. Liu X, et al. (2020) De Novo ARID1B mutations cause growth delay associated with aberrant Wnt/ $\beta$  – catenin signaling. *Hum Mutat*. 41(5):1012 – 24. 10.1002/humu.23990.
  28. Ishibashi M, et al. (2015) Copy number variants in patients with intellectual disability affect the regulation of ARX transcription factor gene. *Hum Genet*. 134(11-12):1163 – 82. 10.1007/s00439-015-1594-x.



29. Oksenberg N, et al. (2013) Function and regulation of AUTS2, a gene implicated in autism and human evolution. *PLoS Genet.* 9:e1003221. 10.1371/journal.pgen.1003221.
30. Ramachandran KV, et al. (2013) Calcium influx through L-type CaV1.2 Ca<sup>2+</sup> channels regulates mandibular development. *J Clin Invest.* 123(4):1638 – 46. 10.1172/JCI66903.
31. Patowary A, et al. (2019) Family-based exome sequencing and case-control analysis implicate CEP41 as an ASD gene. *Transl Psychiatry.* 9(1):4. 10.1038/s41398-018-0343-z.
32. Suls A, et al. (2013) De novo loss-of-function mutations in CHD2 cause a fever-sensitive myoclonic epileptic encephalopathy sharing features with dravet syndrome. *Am J Hum Genet* 93(5):967 – 75. 10.1016/j.ajhg.2013.09.017.
33. Bernier R, et al. (2014) Disruptive CHD8 mutations define a subtype of autism early in development. *Cell.* 158(2):263 – 76. 10.1016/j.cell.2014.06.017.
34. Sugathan A, et al. (2014) CHD8 regulates neurodevelopmental pathways associated with autism spectrum disorder in neural progenitors. *Proc Natl Acad Sci USA.* 111:E4468 – E4477. 10.1073/pnas.1405266111.
35. Hoffman EJ, et al. (2016) Estrogens suppress a behavioral phenotype in zebrafish mutants of the autism risk gene, CNTNAP2. *Neuron.* 89(4):725 – 33. 10.1016/j.neuron.2015.12.039.
36. Turner TN, et al. (2015) Loss of  $\delta$ -catenin function in severe autism. *Nature.* 520(7545):51 – 6. 10.1038/nature14186.
37. Kim OH, et al. (2017) Zebrafish KO of Down syndrome gene, DYRK1A, shows social impairments relevant to autism. *Mol Autism.* 8:50. 10.1186/s13229-017-0168-2.
38. Hu J, et al. (2020) Hyperactivity, memory defects, and craniofacial abnormalities in zebrafish *fmr1* mutant larvae. *Behav Genet.* 50(3):152 – 60. 10.1007/s10519-020-09995-7.
39. Kim L, et al. (2014) Anxiety, hyperactivity and stereotypy in a zebrafish model of Fragile X Syndrome and Autism Spectrum Disorder. *Prog Neuro-Psychopharmacol Biol Psychiatry.* 55:40 – 9. 10.1016/j.pnpbp.2014.03.007.
40. Wu YJ, et al. (2017) Fragile X mental retardation-1 KO zebrafish shows precocious development in social behavior. *Zebrafish.* 14(5):438 – 43. 10.1089/zeb.2017.1446.
41. Sicca F, et al. (2016) Gain-of-function defects of astrocytic Kir4.1 channels in children with Autism Spectrum Disorders and epilepsy. *Sci Rep.* 6:34325. 10.1038/srep34325.
42. Bögershausen N, et al. (2015) RAP1-mediated MEK/ERK pathway defects in Kabuki syndrome. *J Clin Invest.* 125(9):3585 – 99. 10.1172/JCI80102.
43. Van Laarhoven P.M, et al. (2015) Kabuki syndrome genes KMT2D and KDM6A: Functional analyses demonstrate critical roles in craniofacial, heart and brain development. *Hum Mol Genet.* 24(15):4443 – 53. 10.1093/hmg/ddv180.
44. Leong WY, et al. (2015) Methyl-CpG binding protein 2 (*Mecp2*) regulates sensory function through *Sema5b* and *Robo2*. *Front Cell Neurosci.* 9:481. 10.3389/fncel.2015.00481.
45. Pietri T, et al. (2013) The first *mecp2*-null zebrafish model shows altered motor behaviors. *Front Neural Circuits.* 7:118. 10.3389/fncir.2013.00118.
46. Van Der Vaart M, et al. (2017) *Mecp2* regulates *tnfa* during zebrafish embryonic development and acute inflammation. *DMM Dis. Model Mech.* 10(12):1439 – 51. 10.1242/dmm.026922.
47. Elsen GE, et al. (2009) The autism susceptibility gene *met* regulates zebrafish cerebellar development and facial motor neuron migration. *Dev Biol.* 335(1):78 – 92. 10.1016/j.ydbio.2009.08.024.
48. Blanchet P, et al. (2017) MYT1L mutations cause intellectual disability and variable obesity by

- dysregulating gene expression and development of the neuroendocrine hypothalamus. *PLoS. d Genet.* 13(8):e1006957. 10.1371/journal.pgen.1006957.
49. Miller AC, et al. (2015) Neurobeachin is required postsynaptically for electrical and chemical synapse formation. *Curr Biol.* 25(1):16 – 28. 10.1016/j.cub.2014.10.071.
50. Ruzzo EK, et al. (2019) Inherited and de novo genetic risk for autism impacts shared networks. *Cell.* 178(4):850 – 866.e26. 10.1016/j.cell.2019.07.015.
51. Ribeiro D, et al. (2020) Oxytocin receptor signalling modulates novelty recognition but not social preference in zebrafish. *J Neuroendocrinol.* 32:e12834. 10.1111/jne.12834.
52. Vecchia ED, et al. (2019) Reelin signaling controls the preference for social novelty in zebrafish. *Front Behav Neurosci.* 13:214. 10.3389/fnbeh.2019.00214.
53. Plaster N, et al. (2007) REREa/Atrophia-2 interacts with histone deacetylase and Fgf8 signaling to regulate multiple processes of zebrafish development. *Dev Dyn.* 236(7):1891 – 904. 10.1002/dvdy.21196.
54. Kozol RA, et al. (2015) Two KD models of the autism genes SYNGAP1 and SHANK3 in zebrafish produce similar behavioral phenotypes associated with embryonic disruptions of brain morphogenesis. *Hum Mol Genet.* 24(14):4006 – 23. 10.1093/hmg/ddv138.
55. Liu CX, et al. (2018) CRISPR/Cas9-induced shank3b mutant zebrafish display autism-like behaviors. *Mol Autism.* 9:23. 10.1186/s13229-018-0204-x.
56. Chen Y, et al. (2017) Modeling Rett Syndrome Using TALEN-Edited MECP2 Mutant Cynomolgus Monkeys. *Cell.* 169(5):945-55.e10. 10.1016/j.cell.2017.04.035.
57. Liu Z, et al. (2016) Autism-like behaviours and germline transmission in transgenic monkeys overexpressing MeCP2. *Nature.* 530(7588):98-102. 10.1038/nature16533.
58. Zhao H, et al. (2018) Modeling autism in non-human primates: Opportunities and challenges. *Autism Res.* 11(5):686-94. 10.1002/aur.1945.
